# Supplementary material
Source: Research Square preprint supplement (doi:10.21203/rs.3.rs-9567896/v1)
Supplement: Supplementary file 1 [file 4069e7a96591bad8e9dc7211.xlsx]

## Sheet: Sheet1
date	Daily average temperature	Daily average relative humidity	Daily average atmospheric pressur	Daily average wind speed	maximum temperature	minimum temperature	PM2.5	PM10	O3	SO2	NO2	CO
2016-01-01	7.3	64	1032	0.4	12.4	3.2	58	64	74	15	55	0.8
2016-01-02	11.8	65	1023.6	0.2	16.5	9.5	98	120	58	23	80	1.2
2016-01-03	12.3	70	1020.7	0.1	15.8	10.1	151	171	30	26	117	1.6
2016-01-04	12.8	79	1020.5	0.5	15	11.6	120	111	83	25	77	1.3
2016-01-05	10.2	87	1021.8	1.2	12.2	8.6	24	22	87	12	26	0.5
2016-01-06	9	74	1025.8	0.8	9.9	7.5	45	58	67	16	32	0.7
2016-01-07	7.4	70	1028.2	0.4	9.2	5.4	75	83	43	23	57	1
2016-01-08	5.7	50	1027.4	0.7	7.3	4.3	66	75	57	31	53	1
2016-01-09	5.9	50	1027.2	0.3	9.1	3.3	112	120	80	38	76	1.2
2016-01-10	9.1	65	1024.5	0.3	11.2	7.4	59	57	62	25	58	0.7
2016-01-11	8	84	1024	0.9	9.2	6.7	44	35	75	15	32	0.7
2016-01-12	4.9	71	1028.2	0.8	6.7	3.9	41	48	68	16	30	0.6
2016-01-13	2.2	64	1027.7	0.6	3.9	0.4	121	131	38	37	62	1.3
2016-01-14	2.9	64	1025.3	0.3	6.9	-0.1	163	182	39	48	87	1.9
2016-01-15	6.1	56	1021.2	0.2	10	2.9	143	161	58	40	98	1.6
2016-01-16	6.7	62	1020.4	0.4	11.5	3.2	126	128	78	36	80	1.3
2016-01-17	7.9	77	1015.7	0.7	9	6.8	80	68	85	19	38	0.9
2016-01-18	4.1	69	1022.3	1	7.4	1.4	132	136	52	29	45	1.2
2016-01-19	1.1	49	1029.8	0.7	3.8	-0.7	85	95	70	29	43	1
2016-01-20	2.2	56	1032	0.8	4.9	0.1	23	29	61	15	32	0.6
2016-01-21	2.9	87	1028.3	0.6	3.8	2.1	17	13	52	11	30	0.6
2016-01-22	4.1	74	1029.5	0.7	5.6	2.5	37	44	68	14	26	0.7
2016-01-23	-0.6	62	1036.5	0.7	2.5	-3.6	41	55	68	20	22	0.8
2016-01-24	-5.2	38	1039.5	0	-3.6	-7.2	28	85	65	20	18	0.6
2016-01-25	-3	38	1037.6	0.3	2.1	-6.1	35	81	56	20	45	0.7
2016-01-26	0.9	47	1032.4	0.2	7	-3.1	55	90	55	22	80	1
2016-01-27	4.3	76	1028.8	0.3	5.3	2.8	40	44	23	14	79	0.9
2016-01-28	7.5	97	1022.4	0.3	8.5	5.2	22	18	34	10	59	0.9
2016-01-29	6.7	91	1022.5	0.9	8.6	5	24	33	66	11	33	0.7
2016-01-30	5.3	74	1027.8	0.9	6.8	4.4	32	59	67	13	28	0.7
2016-01-31	3.5	74	1031.9	0.8	6.1	0.9	55	70	77	17	32	0.9
2016-02-01	1.1	73	1033.8	1.1	2.7	-0.1	46	47	73	16	25	0.8
2016-02-02	1.7	53	1032.6	0.6	5.5	-1.1	88	102	70	29	54	1.2
2016-02-03	3.3	57	1030.2	0.4	7.4	-0.1	53	59	65	20	56	0.9
2016-02-04	3.8	73	1028.8	0.3	6.4	1	35	38	53	17	59	0.8
2016-02-05	5.3	56	1027.3	0.4	9.5	1.9	133	143	111	32	71	1.4
2016-02-06	4.6	46	1029	0.8	6.6	2.6	56	69	90	21	31	0.9
2016-02-07	4.5	44	1026.3	0.3	9.8	0.2	59	88	109	20	44	0.9
2016-02-08	7.3	43	1022.3	0.2	14.6	1.7	86	139	108	22	41	0.9
2016-02-09	10.5	51	1021.2	0.2	19	4.6	73	109	113	24	45	0.9
2016-02-10	13	55	1019	0.7	19.7	7.9	31	53	118	18	25	0.6
2016-02-11	15.3	85	1015.1	0.6	19	13.3	19	22	93	14	13	0.5
2016-02-12	16.2	88	1012.5	0.5	21.3	14	24	21	70	11	25	0.6
2016-02-13	13.6	87	1009.4	0.6	15.9	9.3	50	50	48	10	27	1.3
2016-02-14	4.3	63	1024.6	1.3	9.3	1.6	33	41	74	11	19	0.6
2016-02-15	2.4	40	1030.2	0.9	5.8	-0.5	30	42	82	17	25	0.6
2016-02-16	5	43	1027.4	0.4	10.4	0.9	36	50	82	20	39	0.7
2016-02-17	7	41	1027.6	0.3	11.7	3	57	70	82	28	54	0.9
2016-02-18	9.4	47	1024.3	0.4	15.6	4.8	67	76	100	20	53	0.8
2016-02-19	9.2	68	1024.3	0.3	10.8	7.1	69	67	52	18	78	0.8
2016-02-20	8.6	50	1027.3	0.9	11.2	6.4	76	107	93	21	40	0.7
2016-02-21	7.1	55	1029.4	0.6	11.7	3.7	40	113	93	13	30	0.6
2016-02-22	7.1	83	1027.9	0.5	8.8	5.2	36	58	91	10	30	0.6
2016-02-23	7.2	77	1030.9	0.7	9.5	6	47	66	89	11	23	0.7
2016-02-24	6.3	58	1036.4	0.9	8.6	4.1	33	49	91	14	24	0.6
2016-02-25	6.1	55	1036.4	0.6	10.7	2.8	44	60	101	15	36	0.6
2016-02-26	9.7	61	1029.9	0.5	15.8	5.6	70	94	91	17	54	0.7
2016-02-27	12.3	60	1024.5	0.3	19	7.3	56	96	95	17	49	0.7
2016-02-28	12.9	59	1022.8	0.6	21	8.1	61	100	90	16	38	0.7
2016-02-29	7.3	51	1032.1	1.1	11	4.5	51	61	97	17	30	0.7
2016-03-01	6.1	50	1030.3	0.7	11.7	2.2	31	53	86	14	36	0.5
2016-03-02	10.2	64	1024.6	0.7	16.1	6.1	65	88	110	16	48	0.7
2016-03-03	14.8	63	1019.8	0.5	22.3	10	63	97	79	20	76	0.8
2016-03-04	17.7	68	1017.6	0.6	22.8	14.4	26	51	93	16	38	0.5
2016-03-05	19.3	71	1016.6	0.6	25.8	15.1	78	99	133	18	44	0.8
2016-03-06	11.6	86	1018.9	0.8	18.7	10.3	76	81	65	11	34	0.8
2016-03-07	13.2	83	1016.2	0.6	20.4	10	69	76	72	13	48	0.8
2016-03-08	10.6	91	1015.6	1.4	13.3	6.6	14	19	83	9	23	0.5
2016-03-09	6	71	1023.9	1.3	7	4.8	16	43	82	9	17	0.4
2016-03-10	4.6	58	1030	1.1	6.3	2.3	18	36	83	12	22	0.5
2016-03-11	5.4	45	1028.6	0.4	10.1	1.3	54	75	85	22	61	0.8
2016-03-12	7.5	53	1023.5	0.6	12	4	79	93	136	21	38	0.7
2016-03-13	9.1	79	1019.9	0.6	10.4	7.7	51	51	95	12	40	0.6
2016-03-14	8.8	68	1024.8	0.8	12	6.1	64	84	114	16	33	0.7
2016-03-15	8.8	63	1023.2	0.7	12.9	5.2	38	48	99	13	35	0.5
2016-03-16	12.6	64	1018.3	0.7	19.2	8.3	40	63	87	13	48	0.6
2016-03-17	13.7	83	1016.4	0.6	18.3	10.5	34	38	67	11	49	0.6
2016-03-18	16.1	85	1011.2	0.3	19.4	14	83	95	47	21	79	1.1
2016-03-19	14.8	84	1016.5	0.5	16.5	13.1	30	31	59	11	48	0.5
2016-03-20	12.6	56	1021.6	0.8	16.7	9	49	75	105	15	48	0.6
2016-03-21	11.7	66	1022.4	0.9	15.1	8.7	50	65	107	13	37	0.5
2016-03-22	12.4	76	1018.9	0.6	14.4	11	34	48	88	13	42	0.5
2016-03-23	11.9	65	1020.9	1	13.7	9.2	30	54	109	13	26	0.4
2016-03-24	8.8	46	1028.3	1.3	12	7	20	52	98	11	20	0.3
2016-03-25	9.7	45	1027.6	0.9	14.2	6.4	29	60	115	16	31	0.4
2016-03-26	10.4	40	1025.8	0.5	15.7	5.4	51	80	119	17	57	0.6
2016-03-27	12.3	48	1024.4	0.5	17	8.2	99	121	108	23	56	0.8
2016-03-28	14.1	41	1023.7	0.4	20.7	8.9	85	109	148	24	63	0.7
2016-03-29	16.4	42	1019.5	0.5	23.3	11.2	62	100	122	20	71	0.7
2016-03-30	17.3	51	1019.6	0.3	19.2	15.9	68	98	100	21	71	0.7
2016-03-31	13.3	85	1016.6	0.3	16	11.5	47	56	86	11	63	0.7
2016-04-01	14.5	80	1015.2	0.6	20.4	10.6	81	73	144	12	50	0.7
2016-04-02	15.7	82	1013.8	0.7	19.4	13.4	51	45	103	11	42	0.6
2016-04-03	15.1	93	1012.4	0.5	16.7	12.2	51	41	85	10	46	0.7
2016-04-04	13.8	65	1015.8	0.7	18.5	11.1	20	46	94	13	35	0.4
2016-04-05	14.7	60	1015.8	0.6	17.9	13	22	46	75	15	44	0.4
2016-04-06	15.3	90	1009.7	0.6	18.5	13.9	31	33	66	10	50	0.7
2016-04-07	15	89	1010.9	0.4	17.5	12.2	57	68	41	14	65	1
2016-04-08	17.2	76	1016.4	0.5	23.4	13.4	38	40	82	12	58	0.6
2016-04-09	18.1	67	1013.8	0.4	23.1	14.6	42	58	107	13	54	0.6
2016-04-10	17.5	73	1011.9	0.5	21.4	14.4	65	75	76	15	56	0.6
2016-04-11	15.6	69	1016.4	0.6	20.9	12	36	50	95	13	43	0.5
2016-04-12	15.4	85	1012	0.4	17.3	13.7	46	66	83	10	47	0.6
2016-04-13	19	80	1006.6	0.4	24.4	16	82	91	126	15	64	0.9
2016-04-14	19.8	68	1011.8	0.4	27.3	15.1	114	127	146	13	56	0.8
2016-04-15	19.3	54	1015.4	0.7	25.4	14.7	66	98	117	14	45	0.5
2016-04-16	18.8	79	1004.6	0.7	22.5	17	27	37	90	11	34	0.6
2016-04-17	17.9	60	1014.6	0.6	22.1	15	49	68	115	16	33	0.7
2016-04-18	16.1	53	1018.5	0.6	20.6	12.3	25	46	125	12	37	0.4
2016-04-19	16.9	59	1020.6	0.7	23	12.7	24	45	124	11	29	0.4
2016-04-20	17.9	86	1013.6	0.6	21	15.5	22	37	91	10	37	0.5
2016-04-21	19.7	84	1008.7	0.3	23.4	16.6	59	77	163	14	57	0.9
2016-04-22	21	72	1010.5	0.4	26	16.6	92	106	202	19	56	1
2016-04-23	15.7	87	1010.6	0.6	21.8	13.8	34	32	139	9	22	0.6
2016-04-24	16.2	79	1013.6	0.5	18.8	14.1	47	87	123	11	38	0.7
2016-04-25	15.2	80	1015.5	0.3	16.6	13.7	36	83	89	10	47	0.6
2016-04-26	15.8	87	1012.3	0.4	16.8	15.1	33	51	77	10	43	0.6
2016-04-27	15.3	85	1008.2	0.4	17.4	13.4	54	66	100	12	43	0.7
2016-04-28	17.8	70	1012.4	0.5	22.6	14.1	86	97	157	20	46	1.1
2016-04-29	19.9	55	1015.8	0.4	26.6	14.1	109	129	187	24	70	1.2
2016-04-30	21.1	47	1012.8	0.5	27	16.1	69	84	192	16	39	0.7
2016-05-01	22	61	1010.3	0.8	28.8	17	43	61	159	12	28	0.7
2016-05-02	21.9	81	1006.3	0.6	24.1	20.3	35	39	91	10	34	0.7
2016-05-03	22	59	1006.1	0.6	26.5	17.3	30	80	134	12	34	0.5
2016-05-04	22.9	46	1011.7	0.4	29.1	17.3	43	102	172	15	56	0.6
2016-05-05	22.6	85	1008.4	0.5	25.1	21.4	36	56	69	9	38	0.6
2016-05-06	24.2	81	1007	0.4	29.6	20.5	67	65	160	14	37	0.8
2016-05-07	18.4	67	1014.4	0.8	23.2	13.9	58	215	110	9	30	0.5
2016-05-08	16.5	75	1014.4	0.4	18.2	14.1	25	69	97	10	27	0.5
2016-05-09	17.3	86	1011.2	0.2	19.5	15.9	43	41	58	9	47	0.6
2016-05-10	16.2	86	1008.9	0.4	17.9	13.2	27	36	86	10	43	0.6
2016-05-11	19.2	69	1011.3	0.3	26.1	14.1	83	100	210	18	54	1
2016-05-12	21.5	61	1010.2	0.7	27.4	16.9	54	74	179	13	31	0.6
2016-05-13	19.6	78	1017.3	0.7	21.9	17.6	63	71	136	9	30	0.7
2016-05-14	20.2	80	1018.3	0.5	24.1	17.4	33	43	103	7	22	0.5
2016-05-15	19.9	85	1011.9	0.5	25.4	14.7	30	36	57	9	31	0.8
2016-05-16	18.5	63	1015.9	0.4	24.7	14.3	41	50	142	14	38	0.8
2016-05-17	20.2	39	1016.6	0.4	26.1	15.6	28	46	139	11	41	0.5
2016-05-18	21	47	1016.1	0.5	26.4	16.2	40	63	167	13	31	0.5
2016-05-19	21.6	67	1013.8	0.5	25.1	19	46	58	135	15	23	0.5
2016-05-20	20.6	79	1012.8	0.5	22.5	19.9	22	36	107	9	22	0.4
2016-05-21	19.7	95	1010.7	0.5	20.2	19.1	15	19	94	6	29	0.5
2016-05-22	21	86	1011.4	0.2	23.9	19	52	55	91	8	36	0.7
2016-05-23	22.3	74	1011	0.2	26.8	19.1	79	82	140	13	54	0.9
2016-05-24	22.5	72	1009.5	0.3	25.6	19.6	85	79	133	16	46	0.9
2016-05-25	23.9	75	1008.6	0.5	29.8	19.8	72	66	168	10	30	0.8
2016-05-26	23.4	88	1008.4	0.3	24.8	22	93	79	62	10	59	1.2
2016-05-27	21.4	92	1010.1	0.2	23.8	20.4	30	20	78	8	38	0.6
2016-05-28	20.6	95	1007.3	0.2	21.1	20.3	28	25	74	8	50	0.7
2016-05-29	20.5	96	1006	0.2	20.9	19.8	45	42	39	9	59	1.2
2016-05-30	21.6	83	1008.8	0.3	24.3	19.7	52	55	119	9	38	0.7
2016-05-31	23.9	80	1006.7	0.4	29.3	20.4	61	65	133	11	37	0.7
2016-06-01	20.6	88	1004.4	0.7	24.6	18.4	22	31	121	8	24	0.5
2016-06-02	21.3	74	1009	0.4	26	18.4	35	43	111	9	27	0.5
2016-06-03	19.6	88	1006.9	0.4	21.3	17.3	18	24	110	7	26	0.5
2016-06-04	21.3	85	1004.8	0.3	24	19.4	37	40	108	9	29	0.7
2016-06-05	21.4	78	1010.3	0.5	24.7	19.1	27	29	108	9	25	0.5
2016-06-06	22.2	79	1009.9	0.4	26.6	19.3	34	43	106	8	23	0.5
2016-06-07	23.9	82	1009.1	0.4	27.3	21.9	38	47	90	8	29	0.5
2016-06-08	23.5	87	1008.3	0.3	25.9	21.9	32	40	60	8	34	0.6
2016-06-09	22	89	1009.7	0.3	22.8	21.3	27	32	83	8	26	0.5
2016-06-10	23.6	82	1009.2	0.4	28.1	20.3	29	40	95	7	18	0.5
2016-06-11	25.8	83	1006.7	0.5	29.5	23.4	48	68	107	10	35	0.6
2016-06-12	22.9	93	1004.8	0.3	26.3	20.8	19	16	89	8	31	0.5
2016-06-13	24	82	1003.7	0.3	29.2	21	28	34	111	11	34	0.5
2016-06-14	25.8	75	1002.2	0.5	31.7	21.4	36	48	178	10	31	0.5
2016-06-15	27	80	1000.2	0.3	32	24	60	72	161	12	41	0.8
2016-06-16	22.8	84	1004.3	0.2	24.6	21.3	97	89	97	12	55	1.1
2016-06-17	24.7	77	1007.3	0.4	29.8	21	57	57	174	11	32	0.8
2016-06-18	26.4	77	1007.4	0.5	31.3	22.6	26	36	140	10	28	0.6
2016-06-19	28.3	71	1007.5	0.4	31.8	25.3	25	41	114	12	31	0.6
2016-06-20	25	92	1005.6	0.3	27.4	23.5	15	20	41	8	31	0.6
2016-06-21	27.8	82	1005.2	0.3	34	23.8	42	62	159	11	47	0.7
2016-06-22	27	89	1003.9	0.3	29.8	24.3	34	40	51	9	46	0.7
2016-06-23	29.2	78	1004.3	0.3	34	25.6	49	66	165	11	40	0.8
2016-06-24	29.3	73	1002.8	0.5	32.9	25.1	36	49	87	11	30	0.7
2016-06-25	22.1	87	1010	0.3	25.1	20.5	38	36	82	6	41	0.7
2016-06-26	22.6	77	1011.7	0.5	25.7	20.6	31	30	133	6	20	0.6
2016-06-27	22.4	93	1007.6	0.2	23.7	21.2	28	32	90	6	41	0.7
2016-06-28	23.7	94	1007.7	0.2	25.8	22.7	59	50	60	9	61	1.2
2016-06-29	24.3	92	1009.5	0.3	26.4	23	28	32	54	8	37	0.7
2016-06-30	28.2	75	1008.7	0.3	34.1	23.9	30	46	156	11	30	0.7
2016-07-01	29	78	1004.6	0.3	33	26	27	43	100	10	34	0.7
2016-07-02	26.6	84	1005.7	0.3	30.7	23.9	18	26	63	9	37	0.8
2016-07-03	26.4	91	1005.9	0.2	29.8	24	48	58	99	10	38	0.8
2016-07-04	29.5	79	1005.1	0.4	35.4	26.3	32	40	143	10	25	0.7
2016-07-05	29.3	75	1008	0.4	33.9	24.9	21	34	131	8	31	0.6
2016-07-06	28.8	77	1011.6	0.5	33.2	24.6	20	41	87	8	27	0.5
2016-07-07	29.5	78	1010.4	0.6	33.2	27.7	11	28	44	7	14	0.5
2016-07-08	28.8	76	1006.7	0.6	32.1	26.9	8	21	43	9	14	0.5
2016-07-09	27.3	82	1004.6	0.5	28.4	26	10	24	48	8	15	0.5
2016-07-10	27.5	87	1001.9	0.4	30.3	26.1	14	25	50	8	19	0.5
2016-07-11	27	94	1000.8	0.2	28.2	26.1	21	29	65	7	26	0.6
2016-07-12	29.3	82	999.6	0.2	33.8	26.7	53	69	175	9	34	0.8
2016-07-13	30.8	77	1000.5	0.2	35.3	28	53	68	193	9	47	0.9
2016-07-14	28.3	89	1002.6	0.1	31	26.7	48	51	42	8	65	1
2016-07-15	30.4	79	1000.4	0.4	36.1	26.9	49	54	175	9	43	0.9
2016-07-16	27.3	78	1002.4	0.3	32	23.7	59	56	137	8	33	1
2016-07-17	28.2	75	1007	0.3	32	25	69	56	148	8	25	0.8
2016-07-18	29.8	74	1006.1	0.5	34.4	27.1	28	35	125	7	19	0.6
2016-07-19	29.9	76	1004.9	0.5	33.4	27.9	27	42	146	8	21	0.6
2016-07-20	31.9	69	1004.3	0.6	37	28	35	60	180	10	23	0.7
2016-07-21	33.8	61	1005.6	0.4	39.1	30.1	38	56	212	12	30	0.7
2016-07-22	33.8	60	1005.8	0.4	39	29.9	41	68	214	13	33	0.7
2016-07-23	34.4	57	1005.7	0.5	40	30	39	58	183	12	26	0.7
2016-07-24	33.1	64	1007	0.5	38.7	28.8	36	54	165	10	19	0.6
2016-07-25	31.3	68	1007.7	0.7	35.9	28	19	34	137	9	15	0.5
2016-07-26	32.3	68	1005.4	0.6	39.5	28.2	33	53	213	11	23	0.7
2016-07-27	33.7	63	1004.4	0.4	40.3	29.9	41	68	175	11	36	0.8
2016-07-28	32	69	1005.1	0.2	39.2	26.1	59	84	180	10	47	0.9
2016-07-29	32.2	71	1006.2	0.4	38	29.3	64	79	203	10	31	0.8
2016-07-30	31.6	71	1007.7	0.6	35.5	28.6	31	39	114	7	13	0.5
2016-07-31	31.2	69	1008.4	0.6	34.9	28.5	12	24	68	8	10	0.4
2016-08-01	30.8	71	1007.6	0.5	34.3	28.3	12	25	59	8	12	0.5
2016-08-02	31.6	72	1006	0.6	35.9	28.8	14	30	99	9	16	0.5
2016-08-03	28.4	83	1006.6	0.4	32.2	25.6	17	30	53	9	36	0.7
2016-08-04	27.7	84	1007.5	0.2	29.8	25.7	23	33	88	11	47	0.7
2016-08-05	29.4	76	1007	0.4	33.3	26.9	18	26	73	9	21	0.6
2016-08-06	30.3	73	1005.3	0.4	34	27.5	15	24	72	9	15	0.5
2016-08-07	30.5	71	1004.1	0.5	35.1	27.8	8	18	73	9	13	0.5
2016-08-08	30.4	70	1004.6	0.6	34.1	27.8	8	18	59	8	16	0.4
2016-08-09	30.1	75	1004.6	0.6	33.6	28.1	9	22	47	8	16	0.5
2016-08-10	30.5	78	1006	0.5	34.4	28	9	19	55	7	14	0.5
2016-08-11	31	72	1007.7	0.6	34.8	28.6	13	24	54	9	15	0.5
2016-08-12	31	76	1006.5	0.5	34.3	29.1	12	22	50	8	13	0.6
2016-08-13	31.5	73	1005.1	0.5	36	28.8	14	26	64	8	12	0.6
2016-08-14	31.1	68	1004.4	0.5	35.7	28.1	19	33	102	9	15	0.6
2016-08-15	31.1	70	1003	0.5	35.7	27.9	12	26	97	8	14	0.6
2016-08-16	31.4	69	1002.3	0.5	35.6	28.6	15	27	88	10	17	0.6
2016-08-17	31.5	65	1002.2	0.5	35.5	28.4	16	29	80	10	19	0.6
2016-08-18	31.4	69	1002	0.5	35.7	28.3	14	32	94	10	16	0.6
2016-08-19	31.4	74	1002.5	0.4	36.7	29.1	15	34	124	9	22	0.6
2016-08-20	31.3	75	1003.2	0.4	35.8	29.1	26	41	142	9	25	0.7
2016-08-21	31.7	70	1003.3	0.4	36.2	29	22	31	80	10	17	0.6
2016-08-22	31.3	68	1006.1	0.5	35.3	27.7	20	29	118	9	17	0.7
2016-08-23	31.2	66	1006	0.7	35.1	28.7	18	28	127	10	19	0.7
2016-08-24	30.1	62	1004.8	0.6	35	27.2	16	31	131	10	21	0.7
2016-08-25	31	67	1003.9	0.5	36.4	28.1	22	36	112	11	22	0.7
2016-08-26	30.1	70	1006	0.7	33.7	27	16	31	99	9	14	0.6
2016-08-27	27.2	64	1008.5	0.7	29.9	24.8	15	39	102	12	23	0.7
2016-08-28	26.7	49	1007.7	0.9	30.9	22.8	20	49	151	14	22	0.7
2016-08-29	26.6	50	1008.1	0.7	31	22.7	21	43	136	13	29	0.7
2016-08-30	26.8	45	1006.3	0.6	31.2	23.2	27	58	139	17	41	0.8
2016-08-31	27.7	46	1003.3	0.3	33.1	23	35	68	182	15	45	0.8
2016-09-01	28.8	55	1001	0.4	33.1	25.6	56	81	187	14	34	0.9
2016-09-02	28.1	62	1002.4	0.4	35.4	23.9	61	84	209	15	38	1
2016-09-03	28.3	61	1006	0.4	34.5	24.1	59	69	160	13	30	0.8
2016-09-04	28.1	67	1009.1	0.6	31.9	25.5	30	36	107	10	17	0.6
2016-09-05	28	66	1010.2	0.4	30.6	26.7	25	38	109	12	26	0.7
2016-09-06	26.7	62	1009.7	0.4	28.3	25.4	37	53	102	15	47	0.8
2016-09-07	22.6	86	1008.1	0.3	26.1	20.7	32	35	89	9	46	0.8
2016-09-08	24.2	78	1009	0.2	29.3	21	63	63	162	13	58	1
2016-09-09	26.4	66	1010.4	0.3	31.6	22.5	61	59	162	12	47	0.9
2016-09-10	26.5	73	1010.6	0.3	28.7	24.9	44	51	124	11	28	0.7
2016-09-11	24.5	80	1012.4	0.1	26.4	21.3	43	47	97	10	41	0.7
2016-09-12	24.7	73	1015.1	0.5	29.1	21.3	32	41	117	10	29	0.7
2016-09-13	25.8	72	1016.6	0.5	29	23.4	28	35	117	10	27	0.6
2016-09-14	23.4	87	1015.7	0.4	25.3	20.7	16	21	73	9	35	0.6
2016-09-15	24.4	93	1012.7	0.3	25.6	23	7	9	59	9	20	0.5
2016-09-16	24.8	96	1006.8	0.3	27.3	22.5	8	12	36	9	16	0.5
2016-09-17	24.6	84	1008.2	0.4	27.8	22.7	12	20	69	10	18	0.5
2016-09-18	25.1	73	1009.5	0.8	27.6	23.4	28	50	94	10	16	0.6
2016-09-19	24.4	71	1010.5	1	27.4	23	17	38	83	11	19	0.6
2016-09-20	23.4	65	1015.6	0.7	27.1	20.5	16	38	89	11	27	0.5
2016-09-21	23.4	70	1018.5	0.3	26.3	20.9	14	27	86	11	36	0.5
2016-09-22	23.6	66	1017.6	0.3	27.4	21	15	25	93	12	36	0.5
2016-09-23	23.6	68	1015.9	0.4	27.2	20.9	24	34	91	13	41	0.5
2016-09-24	24	71	1013.9	0.4	28.5	21.1	31	41	132	11	30	0.5
2016-09-25	24.7	70	1013	0.4	30	21.1	31	41	132	10	30	0.5
2016-09-26	26	77	1012.2	0.4	29.7	22.9	24	35	76	10	27	0.5
2016-09-27	27.8	81	1011	0.5	31	25.9	17	30	32	10	21	0.4
2016-09-28	26.2	88	1010.7	0.9	27.8	23.7	12	19	68	9	18	0.5
2016-09-29	23	89	1011.4	1	23.7	21.9	11	19	67	8	24	0.6
2016-09-30	24.7	91	1010.3	0.1	26.6	23.1	37	44	52	9	56	0.9
2016-10-01	26.1	85	1013	0.2	28.9	24	47	59	87	11	39	0.9
2016-10-02	28	77	1011.5	0.4	31.3	25.1	20	26	83	12	21	0.6
2016-10-03	23.7	85	1010.4	0.3	28	21.4	24	23	86	10	24	0.8
2016-10-04	23.8	78	1010.5	0.5	26.4	22.5	15	27	74	10	21	0.5
2016-10-05	24.5	81	1012.3	0.4	27.2	22.9	32	46	81	11	25	0.6
2016-10-06	23.6	72	1018.7	0.9	24.9	22.5	23	40	115	10	18	0.6
2016-10-07	21.9	84	1016.1	0.3	23.9	19.3	23	42	75	10	41	0.6
2016-10-08	21.4	82	1013.7	0.7	23.8	18.8	16	30	96	10	19	0.5
2016-10-09	19.2	58	1019.3	0.7	21.2	18	11	34	78	10	19	0.4
2016-10-10	19.1	61	1019.2	0.6	22.6	16.3	10	30	88	10	24	0.4
2016-10-11	20.5	64	1018.7	0.6	24.7	17.6	11	27	96	11	26	0.4
2016-10-12	20.7	65	1021.3	0.5	22.1	17.6	27	46	113	13	26	0.6
2016-10-13	20.7	65	1021.1	0.6	21.5	20.1	19	39	82	12	32	0.5
2016-10-14	21	75	1021	0.4	22.5	18.7	24	39	85	12	36	0.5
2016-10-15	22.5	72	1020	0.4	24	21.4	14	36	79	12	32	0.5
2016-10-16	23.8	81	1017.3	0.3	27.6	21.6	42	58	94	16	48	0.8
2016-10-17	21.8	71	1018.7	0.6	23.7	19.8	31	33	86	15	30	0.7
2016-10-18	22	73	1018.9	0.5	24.1	20.3	18	28	96	12	30	0.5
2016-10-19	21.6	79	1017.1	0.3	22.9	20.9	27	47	78	12	38	0.6
2016-10-20	21.1	91	1015.5	0.3	21.6	20.4	21	28	68	11	38	0.6
2016-10-21	21.2	95	1012	0.7	22	19.9	8	10	68	9	23	0.5
2016-10-22	22	96	1008.5	0.5	22.4	21.7	5	7	52	8	20	0.5
2016-10-23	21	84	1011.5	0.6	22.6	18.8	19	34	87	9	20	0.5
2016-10-24	21.7	78	1014.6	0.3	25.2	19.6	21	35	83	10	33	0.6
2016-10-25	20.5	81	1013.9	0.4	22.6	18	31	45	36	14	45	0.9
2016-10-26	19.7	92	1015.7	0.4	22	18	23	22	71	10	52	0.8
2016-10-27	19.1	93	1017.6	0.5	21.2	17.3	15	22	72	9	40	0.6
2016-10-28	19	90	1017.9	0.5	22	15.7	24	28	60	10	34	0.6
2016-10-29	15.5	72	1027.4	0.6	16.2	14.9	15	34	63	9	22	0.5
2016-10-30	15.9	63	1028.4	0.4	18.3	13.9	13	36	72	10	28	0.4
2016-10-31	15.7	80	1025.7	0.4	16.6	14.3	16	30	59	10	36	0.5
2016-11-01	14.3	66	1030.4	0.7	15.6	12.3	13	26	76	8	21	0.4
2016-11-02	12.7	61	1029.3	0.4	16.3	9.9	25	49	80	12	53	0.5
2016-11-03	13.7	65	1025.9	0.2	17.9	10.5	62	91	86	18	79	1
2016-11-04	15.3	68	1017.9	0.2	20.7	11.8	64	81	121	15	74	0.8
2016-11-05	17.6	75	1013.4	0.2	23.1	14	66	89	115	15	75	0.8
2016-11-06	18.6	81	1018	0.2	23.4	15.2	61	60	86	16	65	0.8
2016-11-07	20	86	1019.2	0.2	23.8	17.7	33	35	65	13	48	0.6
2016-11-08	14.1	78	1025	1	19.9	11.9	15	25	73	9	21	0.5
2016-11-09	12.2	60	1029.1	0.7	13.3	11.6	14	31	67	9	25	0.4
2016-11-10	12.1	69	1023.6	0.3	13.1	10.7	34	53	41	14	56	0.7
2016-11-11	12.4	71	1021.5	0.2	17.5	8.9	47	81	62	18	61	0.8
2016-11-12	16.7	72	1019.4	0.3	21.7	13	35	65	92	13	50	0.6
2016-11-13	18.3	88	1017.9	0.1	21	16.9	49	52	30	11	63	0.8
2016-11-14	18.6	81	1016.2	0.2	20.2	17.6	80	82	72	18	64	1.1
2016-11-15	16.1	70	1022.2	0.6	18.4	13.7	41	67	83	13	30	0.7
2016-11-16	14.5	71	1021.9	0.3	17.2	12.3	13	35	61	12	51	0.5
2016-11-17	15.8	89	1019.4	0.3	16.7	15.1	17	21	44	11	53	0.6
2016-11-18	19.4	90	1014.8	0.2	23.3	16.7	60	66	84	13	60	0.9
2016-11-19	19.6	89	1014.5	0.1	21.7	18	103	108	18	21	88	1.6
2016-11-20	18.6	89	1017.8	0.5	20.3	17.1	39	29	58	11	31	0.9
2016-11-21	18.1	91	1015.2	0.3	20.2	16.8	27	37	45	12	49	0.8
2016-11-22	13.1	86	1023	0.8	17.6	9	9	13	67	9	21	0.5
2016-11-23	6.6	84	1029.8	0.9	9.3	4.9	19	21	48	11	34	0.6
2016-11-24	5.2	72	1030.4	0.6	8.8	2.2	48	52	53	19	48	0.9
2016-11-25	8.8	69	1026.6	0.4	11.7	6.5	40	52	35	15	59	0.8
2016-11-26	9.5	91	1022.4	0.3	11.9	6.8	31	29	38	13	53	0.9
2016-11-27	8.7	70	1024.4	0.4	12.6	5.8	95	114	58	36	73	1.5
2016-11-28	9.7	63	1030.1	0.4	12.6	7.4	58	106	74	20	54	0.9
2016-11-29	10.2	72	1031.6	0.1	13.1	6.9	18	42	48	13	59	0.7
2016-11-30	12.2	72	1028	0.2	13.8	11.1	48	80	24	17	80	0.9
2016-12-01	11.5	68	1029.5	0.3	14.2	9.3	95	126	86	25	63	1.2
2016-12-02	11.5	60	1031.5	0.3	14	8.8	27	47	72	13	53	0.7
2016-12-03	11.5	67	1026.6	0.3	15.4	8.1	24	42	78	13	55	0.6
2016-12-04	13.2	78	1020.3	0.1	16.3	12	76	107	57	21	84	1.2
2016-12-05	13.7	74	1020.3	0	18.7	10.6	116	145	66	23	86	1.4
2016-12-06	10.7	60	1028.7	0.7	15.2	8.7	34	60	62	15	47	0.7
2016-12-07	10.3	61	1023.8	0.2	14.6	7.1	95	126	54	23	88	1.2
2016-12-08	12.1	62	1019.9	0.2	15.9	9.1	124	148	106	23	103	1.4
2016-12-09	11.8	65	1021.1	0.5	14.3	10.3	84	92	87	20	61	1
2016-12-10	10.9	62	1025.6	0.6	12.9	9.2	16	28	64	13	33	0.5
2016-12-11	11.2	63	1025.1	0.7	13.8	9.5	14	29	65	13	32	0.6
2016-12-12	13.7	79	1019.4	0.2	17.4	11.1	28	56	36	14	64	0.9
2016-12-13	13.2	91	1018.2	0.3	15.2	10.6	31	40	54	12	48	0.8
2016-12-14	7.9	67	1026.7	1.1	10.9	5.4	19	38	59	12	26	0.5
2016-12-15	4.2	52	1031	0.7	6.9	1.6	64	80	57	26	55	1
2016-12-16	5.1	55	1032.8	0.5	7.8	2.7	139	146	70	35	80	1.5
2016-12-17	6.9	68	1029.6	0.3	12.2	2.9	110	104	73	21	75	1.2
2016-12-18	11.9	79	1025.4	0.1	17.6	8.2	38	66	51	14	74	1.2
2016-12-19	14.6	82	1022.1	0.2	18.3	12	60	85	26	19	86	1.3
2016-12-20	13.7	84	1023.2	0.8	15	12.4	41	38	65	13	49	0.7
2016-12-21	15.8	94	1018.6	0.4	18.4	13.5	30	30	32	12	50	0.8
2016-12-22	9.7	78	1021.9	0.6	13.5	8.6	87	90	53	15	52	1.3
2016-12-23	7.8	68	1027.1	0.5	9.9	5.9	130	126	57	24	58	1.6
2016-12-24	7.9	62	1028.7	0.7	10.5	5.7	22	29	56	13	38	0.7
2016-12-25	10.9	82	1025.1	0.6	12.1	9.7	16	20	47	12	48	0.6
2016-12-26	11.5	96	1020	0.4	13.3	8.8	16	15	50	10	50	0.9
2016-12-27	6	67	1030.1	1.2	8.8	4.2	28	40	61	12	27	0.8
2016-12-28	4.1	65	1031.7	0.6	6.3	2.5	35	50	40	15	48	0.8
2016-12-29	4.6	61	1033.8	0.7	6.8	2.4	63	76	68	18	46	0.9
2016-12-30	6	64	1032.4	0.4	10.3	2.5	51	69	39	15	71	1
2016-12-31	8.5	77	1029	0.3	13.5	4.9	44	65	30	20	80	1.1
2017-01-01	10.4	84	1026	0.3	14.6	7.3	33	46	60	18	60	0.8
2017-01-02	12.4	85	1022.9	0.3	14.7	10.7	66	73	44	20	60	1.1
2017-01-03	10.7	80	1025.3	0.4	13.6	7.9	94	93	67	16	68	1.1
2017-01-04	12.6	80	1022.3	0.4	15.7	10.3	50	54	66	19	66	0.8
2017-01-05	10.9	92	1020.4	0.8	13.3	9.8	25	23	78	12	40	0.8
2017-01-06	11.8	93	1021.2	0.4	14.1	9.8	20	26	49	12	48	0.7
2017-01-07	12.6	96	1015.8	0.5	13.5	10.6	15	15	61	12	44	0.8
2017-01-08	8.4	87	1017.5	0.6	10.6	7.4	75	72	10	14	50	1.6
2017-01-09	6.7	68	1023.4	0.9	8.3	5.1	64	69	66	20	40	1.2
2017-01-10	6.7	63	1025.7	0.6	8.4	4.8	79	81	72	17	49	1.1
2017-01-11	7.2	62	1027.7	0.7	8.1	6.5	29	39	68	14	37	0.7
2017-01-12	6.3	74	1023.8	0.3	7.3	4.7	55	61	33	16	68	0.9
2017-01-13	6.7	70	1021.5	0.4	10.4	3.8	98	108	59	29	63	1.2
2017-01-14	5.7	55	1026.9	0.8	7.8	3.9	22	33	70	14	27	0.6
2017-01-15	5.2	56	1030.3	0.9	6.6	4	12	24	64	12	25	0.5
2017-01-16	5.4	59	1029.1	0.7	7.9	3.4	17	27	64	13	38	0.6
2017-01-17	7.2	67	1028.9	0.5	9.7	4.3	39	51	43	16	66	0.8
2017-01-18	8.3	83	1028	0.6	9	7.9	35	40	64	15	48	0.7
2017-01-19	8.1	73	1026.3	0.5	8.6	7.6	78	88	62	19	58	1
2017-01-20	3.7	49	1031.4	1.1	7.8	0.7	68	99	71	17	30	0.9
2017-01-21	2.2	50	1031.6	0.4	6.7	-1	36	46	68	14	53	0.8
2017-01-22	4	44	1033	0.6	6.7	1.9	44	66	68	19	48	0.8
2017-01-23	3.4	47	1035	0.8	6.6	0.8	22	36	77	16	32	0.7
2017-01-24	4.6	59	1035.3	0.6	8.5	1.7	29	41	87	16	38	0.7
2017-01-25	7.2	63	1033.8	0.7	10.3	4.8	55	61	93	17	38	0.8
2017-01-26	7.6	73	1029.5	0.4	12.1	4.2	52	52	105	15	42	0.7
2017-01-27	7.5	76	1027.9	0.6	9.9	5.4	42	75	75	12	27	0.7
2017-01-28	9.5	75	1023.3	0.6	14.3	5.9	26	71	95	11	23	0.6
2017-01-29	13.5	80	1016.7	0.5	21.5	8.9	55	60	82	13	29	0.9
2017-01-30	5	66	1029.9	1.4	11.3	2.8	22	39	75	9	12	0.5
2017-01-31	3.8	56	1030.3	0.8	7	2	11	19	76	8	14	0.4
2017-02-01	4.8	67	1031.3	0.7	5.5	3.9	31	38	82	11	19	0.6
2017-02-02	4.9	63	1032.9	0.5	8.2	3	21	30	80	9	21	0.5
2017-02-03	7.3	78	1025.7	0.2	9.6	4.4	16	23	50	11	41	0.6
2017-02-04	8.9	91	1019.5	0.2	10.1	8.3	54	50	19	11	58	1
2017-02-05	7.9	77	1019.8	0.5	9.2	6.4	113	112	52	13	52	1.3
2017-02-06	6.7	63	1025.4	0.7	9.4	5	65	65	88	11	28	0.8
2017-02-07	6.8	60	1026.1	0.9	9.9	5	13	25	81	9	24	0.4
2017-02-08	5.6	80	1022.9	0.8	7.4	3.5	15	17	70	8	26	0.5
2017-02-09	3.1	64	1025.8	1	5.7	1	72	72	83	16	33	1
2017-02-10	3.2	36	1027.5	0.8	6.6	0	40	59	79	18	38	0.8
2017-02-11	4	32	1031	0.6	8.1	0.9	43	60	79	19	54	0.9
2017-02-12	5.7	37	1031	0.2	11.7	1.1	64	67	91	18	72	1
2017-02-13	7.9	48	1031.5	0.4	14.2	3.4	59	56	99	16	67	0.8
2017-02-14	9	49	1034	0.3	15.5	4.1	67	65	115	18	79	0.9
2017-02-15	9.9	55	1029.5	0.5	15.2	6	65	59	131	16	50	0.7
2017-02-16	13	69	1019.2	0.5	18.4	9	38	48	77	12	54	0.7
2017-02-17	10.1	79	1023.1	0.7	14.8	6.3	49	71	68	12	42	0.7
2017-02-18	7.6	62	1028.4	0.7	12.8	4.8	15	36	66	12	37	0.4
2017-02-19	10.8	69	1017.9	0.6	18.3	6.1	36	62	107	12	35	0.6
2017-02-20	11.4	67	1017.3	0.9	16.3	4.9	41	77	79	10	30	0.6
2017-02-21	6.4	65	1027.3	1	9.4	4	21	45	81	8	23	0.5
2017-02-22	8	86	1018.3	0.7	10.8	4.7	54	57	57	8	41	0.9
2017-02-23	4.8	67	1025.7	0.8	7.1	3.6	76	72	85	13	34	0.8
2017-02-24	5.7	52	1028.5	0.7	9.3	3.3	42	50	97	13	41	0.7
2017-02-25	7.1	57	1026	0.4	12.3	3	80	79	110	16	69	0.9
2017-02-26	9.7	51	1025.2	0.3	14.8	6.3	117	106	127	17	76	1
2017-02-27	9.9	50	1027.5	0.6	14.7	6.1	43	40	101	13	56	0.7
2017-02-28	9.9	58	1024.8	0.5	14.9	6.3	39	44	104	12	47	0.6
2017-03-01	11.3	63	1018.8	0.5	16.5	7.3	50	82	88	14	53	0.7
2017-03-02	7.4	48	1024.6	1	11.7	3.8	44	60	85	13	41	0.7
2017-03-03	8.6	52	1020.5	0.6	13.6	4.3	48	65	110	15	49	0.7
2017-03-04	12.4	60	1015.9	0.4	19.8	7.1	56	76	112	17	73	0.8
2017-03-05	11.9	77	1015.7	0.3	13.1	10.7	64	63	48	13	76	0.8
2017-03-06	9.5	55	1020.3	1	11.9	6.7	27	41	92	8	27	0.5
2017-03-07	9.2	47	1020.7	0.5	14.7	4.9	35	59	100	11	47	0.6
2017-03-08	9	52	1021.5	0.7	14	5	42	64	92	13	49	0.7
2017-03-09	10.9	54	1019.4	0.4	17.5	6.1	75	90	108	17	75	0.8
2017-03-10	12.7	63	1017.9	0.5	15.7	10.7	61	71	90	14	56	0.7
2017-03-11	12.2	68	1020.6	0.5	17.2	8.6	51	57	134	11	40	0.6
2017-03-12	12.2	81	1018.3	0.6	13.1	11.2	25	25	95	8	36	0.6
2017-03-13	9	85	1018.8	1.1	11.2	6.9	27	39	97	7	26	0.6
2017-03-14	8.6	59	1024.4	0.9	12.5	5.2	27	45	96	9	30	0.6
2017-03-15	9.2	49	1025.2	0.6	14.4	5	30	45	105	13	49	0.6
2017-03-16	10	59	1021.9	0.6	12.7	8.3	24	37	95	10	38	0.5
2017-03-17	9.9	62	1022.9	0.6	13.8	6.8	33	40	96	10	47	0.5
2017-03-18	11.6	66	1022.4	0.6	13.3	9.8	29	36	92	10	37	0.5
2017-03-19	11.2	77	1023.4	0.6	12.7	10.2	37	39	95	9	42	0.6
2017-03-20	11.5	93	1016.7	0.3	12.5	10.7	40	30	87	7	52	0.7
2017-03-21	11.4	72	1022.1	0.9	15.6	8.9	60	69	128	11	34	0.7
2017-03-22	8.9	75	1020.7	0.7	10.7	8	16	26	79	8	34	0.5
2017-03-23	9.3	86	1020	0.6	11.2	7.8	20	27	82	7	36	0.5
2017-03-24	10.2	75	1021.2	0.6	12.2	8.5	38	47	95	9	43	0.6
2017-03-25	10.5	68	1021.3	0.5	15.2	6.9	76	87	88	14	59	0.9
2017-03-26	13.2	52	1022.1	0.4	18.3	8.4	74	110	107	17	62	0.9
2017-03-27	14.5	39	1024.2	0.4	20.1	8.9	62	87	113	18	58	0.8
2017-03-28	16.2	46	1019.4	0.8	21.3	11.8	35	73	120	12	40	0.6
2017-03-29	14.9	65	1020.5	0.7	18.7	11.5	56	76	102	10	42	0.8
2017-03-30	11.1	80	1021.1	0.8	14.4	9.6	39	41	90	7	37	0.6
2017-03-31	11.1	74	1020.9	1	14.4	7.9	35	43	106	8	29	0.6
2017-04-01	12.2	43	1021.8	0.6	16.4	7.7	64	85	122	15	72	0.9
2017-04-02	14.5	54	1021.7	0.5	21.9	9.1	79	87	127	16	56	0.8
2017-04-03	16.1	45	1023.3	0.6	23.3	10.4	61	68	149	12	39	0.7
2017-04-04	16.2	55	1019.6	0.8	19.5	12.8	45	55	138	9	25	0.6
2017-04-05	19.2	69	1012.7	0.5	23.3	16.3	39	62	85	10	59	0.8
2017-04-06	18.1	83	1011.1	0.4	20.4	16.9	64	63	51	12	69	0.9
2017-04-07	15.2	92	1012.3	0.5	16.9	14.2	39	35	45	7	59	0.7
2017-04-08	16.6	84	1012.6	0.7	21.6	14	56	54	86	9	53	0.7
2017-04-09	13	89	1011.8	1	14.7	11.4	29	36	106	7	29	0.6
2017-04-10	12.1	91	1009.5	0.5	14.1	10.3	24	28	75	6	40	0.6
2017-04-11	11.7	88	1012.6	0.4	12.8	10.7	55	61	88	8	56	1
2017-04-12	14.4	54	1018.8	0.4	19.7	11.3	43	88	98	10	59	0.7
2017-04-13	15.6	41	1020.1	0.6	22.4	10	19	70	117	9	48	0.5
2017-04-14	18.9	47	1013.6	0.5	27.2	12.8	28	65	155	12	46	0.6
2017-04-15	22.5	58	1011.5	0.4	31.2	15.4	40	74	166	13	53	0.8
2017-04-16	22.3	66	1011.1	0.5	29.2	17.9	43	57	63	10	59	0.7
2017-04-17	21.6	77	1004.9	0.4	24.5	19.5	49	63	129	11	52	1
2017-04-18	22.1	58	1004.8	0.5	28.2	18.2	39	112	131	15	49	0.8
2017-04-19	20.1	42	1010.4	0.6	24.8	15.6	34	101	130	11	38	0.7
2017-04-20	20.7	76	1008.3	0.5	26.5	16.8	44	72	126	9	35	0.8
2017-04-21	19.1	61	1011.1	0.6	22.4	17.4	47	71	99	15	43	0.8
2017-04-22	17.2	57	1015.2	0.8	20.9	14	30	57	129	9	27	0.6
2017-04-23	17.3	52	1016.8	0.6	22.7	13.3	35	71	154	9	30	0.6
2017-04-24	18.7	59	1015.8	0.6	24.7	14.3	38	80	166	10	33	0.6
2017-04-25	20.1	67	1014.4	0.4	24.3	16.5	36	59	113	9	39	0.6
2017-04-26	17.1	79	1015.6	0.7	20.1	15.5	22	32	110	7	23	0.5
2017-04-27	16.9	44	1018.2	0.5	21.2	13.6	24	46	118	11	46	0.6
2017-04-28	18.9	48	1014.4	0.4	24.9	13.5	43	73	164	15	64	0.7
2017-04-29	22.1	40	1011.6	0.3	29	16.2	52	83	169	18	57	0.7
2017-04-30	23.7	37	1010.9	0.4	30.6	18.1	37	70	182	15	38	0.6
2017-05-01	22.7	62	1012.9	0.4	28.6	18.5	26	47	116	10	30	0.5
2017-05-02	20	76	1015.5	0.5	22.2	17.6	15	24	96	7	20	0.4
2017-05-03	19.5	72	1016.3	0.6	22.9	17.6	15	30	94	7	20	0.4
2017-05-04	19.9	89	1010.9	0.5	20.6	19.2	24	31	75	6	31	0.6
2017-05-05	20.1	81	1014.3	0.2	21.6	19	45	49	54	7	43	0.8
2017-05-06	20.7	68	1018.7	0.5	24.9	18	48	189	103	9	40	0.6
2017-05-07	21.7	47	1017.6	0.4	27.1	18.5	50	227	138	9	38	0.5
2017-05-08	18.2	64	1011.8	0.5	21.7	14.8	26	86	90	7	29	0.4
2017-05-09	19.9	74	1008.9	0.4	22.2	18.2	44	60	110	8	45	0.8
2017-05-10	23.5	56	1013	0.3	32.1	16.6	55	87	188	14	61	0.9
2017-05-11	26.3	53	1011.7	0.3	33.9	20.9	44	78	200	13	50	0.8
2017-05-12	20.5	81	1009.4	0.5	27.6	17.9	30	35	113	7	44	0.7
2017-05-13	22.6	67	1008.7	0.4	29.9	17.3	45	57	167	11	49	0.8
2017-05-14	23.1	66	1011.2	0.7	27.8	20	51	66	152	12	37	0.7
2017-05-15	21	50	1014.3	0.6	24.4	18.8	19	54	105	11	33	0.5
2017-05-16	20.8	49	1012	0.5	24.3	19.2	14	37	102	12	39	0.4
2017-05-17	21.2	50	1011.8	0.4	27.8	16.2	19	46	122	9	34	0.5
2017-05-18	22.5	56	1014.8	0.6	28.5	17.9	21	45	145	9	27	0.5
2017-05-19	22.1	62	1014.4	0.6	26.2	19.3	25	46	144	9	20	0.6
2017-05-20	23.5	70	1011.5	0.6	27.9	20.9	20	38	114	8	18	0.5
2017-05-21	23.6	64	1010.7	0.6	27.8	20.5	16	33	111	7	17	0.5
2017-05-22	24.2	70	1010.3	0.6	29	21	13	31	96	7	16	0.5
2017-05-23	23	87	1007.4	0.4	24.5	21.8	22	29	62	8	32	0.6
2017-05-24	20.5	85	1008.9	0.7	21.9	19.3	14	20	94	7	21	0.6
2017-05-25	22	57	1010.6	0.3	28.6	17.4	35	54	142	14	55	0.7
2017-05-26	23.1	57	1011.5	0.5	27.1	19.5	37	52	126	11	40	0.5
2017-05-27	23.5	55	1012.2	0.5	29.9	18.2	23	51	157	14	39	0.5
2017-05-28	25.4	52	1012.2	0.5	31.7	20.5	26	55	178	14	34	0.5
2017-05-29	24.9	54	1012.2	0.6	31	20.3	17	36	135	10	21	0.4
2017-05-30	25.1	72	1008.4	0.7	29.9	21.6	23	42	140	11	20	0.4
2017-05-31	27.7	62	1002.7	0.3	33.4	24.6	47	71	162	13	46	0.7
2017-06-01	27.6	68	1000.3	0.4	30.5	25.7	75	90	178	15	56	0.9
2017-06-02	26	61	1003.9	0.7	29	23.6	40	44	134	10	28	0.5
2017-06-03	24.7	51	1006.9	0.6	30.5	21.4	14	33	130	10	25	0.4
2017-06-04	23.6	58	1009.7	0.7	28.1	20.5	13	29	120	9	17	0.4
2017-06-05	20.9	77	1011.4	0.5	23.2	18.3	16	27	107	8	21	0.4
2017-06-06	23.2	85	1007.7	0.4	29.3	18.2	28	37	94	7	28	0.6
2017-06-07	23.6	64	1010.5	0.4	28.1	20.1	54	58	195	12	36	0.8
2017-06-08	25.1	65	1012	0.4	29.2	21.4	73	61	200	11	34	0.8
2017-06-09	26.1	69	1008.6	0.4	31.4	22.9	61	65	191	11	37	0.8
2017-06-10	24.6	88	1005	0.4	27.6	22.7	24	22	68	7	35	0.6
2017-06-11	24.4	78	1007.1	0.6	27.8	22	12	16	120	7	17	0.4
2017-06-12	21.5	83	1010.7	0.4	24.3	19.8	10	15	106	6	23	0.4
2017-06-13	21.2	90	1011.7	0.3	22	20.1	16	20	94	7	32	0.5
2017-06-14	22.1	76	1011.7	0.6	25.2	19.2	20	30	102	7	28	0.4
2017-06-15	22.8	63	1011.3	0.3	27	19.3	30	42	131	8	37	0.5
2017-06-16	23.6	60	1009.4	0.3	26.6	20.3	31	40	131	8	25	0.4
2017-06-17	24.3	58	1008.7	0.5	29.7	20.1	29	39	152	10	25	0.5
2017-06-18	24.5	69	1009.1	0.5	28.4	21.8	25	37	115	9	16	0.4
2017-06-19	23.8	87	1006.2	0.3	25.1	23.2	16	23	84	6	24	0.5
2017-06-20	25.3	85	1002.3	0.3	30	22.5	23	22	85	8	31	0.5
2017-06-21	24.4	91	1005	0.3	25.8	23.3	30	31	76	8	30	0.6
2017-06-22	23.3	90	1006.2	0.4	24.6	22.2	11	12	97	5	22	0.5
2017-06-23	24.6	90	1005.6	0.2	27.2	23.2	50	43	64	6	45	0.7
2017-06-24	24	94	1001.7	0.2	25.4	22.6	31	28	72	7	45	0.7
2017-06-25	24.4	94	1002.4	0.2	25	23.1	44	42	47	7	44	0.8
2017-06-26	24.4	87	1005.7	0.2	28.5	22	85	75	122	10	46	1
2017-06-27	25.1	83	1008	0.3	29.5	23.6	87	68	151	9	45	1
2017-06-28	24.5	82	1010	0.4	26.5	23	45	39	131	8	31	0.7
2017-06-29	24.6	84	1009.1	0.4	27.3	22.4	30	28	94	6	34	0.7
2017-06-30	27.5	78	1007.1	0.3	32.6	24.2	31	40	139	7	39	0.7
2017-07-01	27.5	83	1005.2	0.3	32.9	22.9	41	49	146	7	36	0.7
2017-07-02	28.7	78	1004.8	0.5	34.1	24.9	19	35	102	6	21	0.5
2017-07-03	29.6	75	1005.7	0.4	33.7	26.1	24	35	143	7	24	0.6
2017-07-04	30	66	1006.6	0.5	33.4	27.6	19	31	114	8	23	0.5
2017-07-05	30.1	71	1008.3	0.4	36.2	24.9	26	43	148	8	37	0.6
2017-07-06	29.6	76	1007.8	0.4	36	25.3	25	42	168	8	30	0.6
2017-07-07	31.9	66	1006	0.4	36.7	28.4	25	49	152	8	27	0.6
2017-07-08	32.2	64	1006	0.4	36.7	29.9	26	45	143	8	28	0.6
2017-07-09	31.3	64	1004.9	0.5	34	29.4	18	38	111	9	24	0.5
2017-07-10	30.5	68	1002.5	0.5	34.1	26.4	18	36	89	7	28	0.5
2017-07-11	30.2	69	1007.2	0.4	36	26.2	23	39	161	8	27	0.5
2017-07-12	32.5	64	1008.7	0.4	38	28.7	34	55	199	9	33	0.6
2017-07-13	33	61	1006.6	0.4	37.9	29.8	39	64	217	11	36	0.7
2017-07-14	33.2	60	1005.7	0.5	39.7	30.1	40	66	196	9	41	0.7
2017-07-15	32.8	64	1007	0.6	37.9	29.4	31	51	184	8	20	0.6
2017-07-16	32.4	62	1008.9	0.7	38	28.8	20	42	182	8	17	0.5
2017-07-17	32.2	63	1010.2	0.8	36.1	29.5	14	37	120	8	17	0.4
2017-07-18	32.6	67	1009.2	0.3	37.6	29.9	39	72	190	10	53	0.7
2017-07-19	33.9	56	1007	0.3	37.9	30.7	38	62	193	12	36	0.6
2017-07-20	34.6	53	1006	0.4	39	30.8	33	57	206	13	30	0.6
2017-07-21	34.3	57	1007.4	0.4	40.9	30.7	38	67	238	14	34	0.7
2017-07-22	33.5	61	1008.7	0.4	38.3	29.6	45	72	209	14	34	0.7
2017-07-23	32.9	66	1006.4	0.3	39	29.1	37	61	243	13	36	0.7
2017-07-24	34	57	1003.6	0.3	40.2	29.8	39	67	262	15	39	0.7
2017-07-25	35	53	1003.3	0.4	40.5	31	48	76	208	14	32	0.8
2017-07-26	33.6	67	1004.2	0.8	38.8	30.6	49	54	164	8	21	0.7
2017-07-27	33.2	61	1004.5	0.6	37.8	29.5	41	54	144	10	21	0.6
2017-07-28	32.6	66	1006.1	0.7	37.4	29.2	16	29	85	7	15	0.5
2017-07-29	31.2	72	1005.7	0.5	33.2	29.3	17	28	66	7	13	0.5
2017-07-30	31.1	74	1002.8	0.5	34.6	28.8	15	29	55	6	11	0.5
2017-07-31	31.8	73	1001.2	0.8	35.6	28.9	15	35	73	5	9	0.5
2017-08-01	31.1	71	1002.2	0.8	34.3	29.4	18	41	83	5	11	0.5
2017-08-02	31.4	69	1002.1	0.8	35.7	29	18	36	94	6	12	0.5
2017-08-03	32.2	68	999.5	0.8	37.2	29	24	42	183	7	16	0.6
2017-08-04	31.5	76	1000.3	0.6	38.1	28.5	36	54	185	7	31	0.7
2017-08-05	29.4	88	1001.2	0.3	32.3	27.9	57	66	97	7	60	1.1
2017-08-06	31.7	74	1001.1	0.4	37	28.6	74	71	209	9	44	1.2
2017-08-07	33.1	63	1001	0.3	37.6	29.7	70	83	234	9	35	1
2017-08-08	29.3	82	1000.5	0.4	34	25.2	31	42	94	8	42	0.8
2017-08-09	27.2	88	999.3	0.2	29.4	25.2	16	23	77	6	35	0.7
2017-08-10	30.1	72	1000.8	0.3	34.6	27.2	38	50	212	9	35	0.8
2017-08-11	31.5	67	1004.1	0.2	37.1	28.5	58	74	225	9	47	0.9
2017-08-12	29.8	77	1006.1	0.4	31.6	28.9	39	48	138	8	26	0.6
2017-08-13	31	73	1004.1	0.3	34.6	28.7	28	40	117	7	27	0.6
2017-08-14	29.1	79	1003.7	0.3	33.8	25	15	28	110	7	33	0.6
2017-08-15	29.9	72	1004.5	0.2	33.2	26.7	51	62	180	8	37	1
2017-08-16	29.5	70	1005.7	0.4	33	26.7	30	37	138	8	35	0.7
2017-08-17	29.7	69	1007.6	0.4	34.6	27.2	24	39	162	9	45	0.7
2017-08-18	28.9	74	1009.3	0.4	35.1	24	20	33	184	8	33	0.6
2017-08-19	31.9	67	1007.4	0.4	37.6	28.3	31	49	187	8	26	0.6
2017-08-20	26.9	85	1005.8	0.4	31.6	24	13	25	70	6	34	0.6
2017-08-21	28.4	84	1005.3	0.3	32.4	25.5	27	38	116	8	37	0.7
2017-08-22	30.2	80	1007.2	0.4	34.3	27.9	9	22	44	6	16	0.5
2017-08-23	30.9	75	1008.7	0.7	34.3	28.6	8	26	64	6	14	0.5
2017-08-24	32.1	68	1007.8	0.5	36.8	28.9	19	37	162	7	24	0.6
2017-08-25	31.4	72	1008.3	0.4	37.1	28.6	27	42	134	8	41	0.8
2017-08-26	28.8	69	1011.9	0.9	30.8	27.4	13	26	112	7	18	0.6
2017-08-27	29.7	67	1012.4	0.6	33.8	26.9	12	28	101	8	19	0.5
2017-08-28	31.9	67	1010.1	0.5	37.6	28.2	18	36	170	8	26	0.5
2017-08-29	30.1	74	1011.6	0.7	33.2	26.5	16	33	95	9	23	0.5
2017-08-30	26.3	61	1012.7	0.8	27.6	25.6	9	29	88	7	18	0.5
2017-08-31	25.7	61	1012.3	0.8	27.3	24.2	14	32	120	7	19	0.5
2017-09-01	26.3	60	1010.9	0.7	29.4	24.8	18	38	138	7	18	0.6
2017-09-02	26.4	66	1010.1	0.7	29.9	24.3	19	38	126	8	18	0.6
2017-09-03	26.9	65	1011.3	0.5	29.2	25.6	11	29	103	9	18	0.5
2017-09-04	27.9	70	1010.4	0.6	32.3	25.6	9	29	96	7	18	0.5
2017-09-05	29.3	70	1008.5	0.4	35.1	25.9	22	50	143	9	31	0.6
2017-09-06	29.1	75	1007.1	0.4	31.7	27.2	53	68	99	12	44	0.9
2017-09-07	24.8	88	1008.8	0.4	27.3	23.4	20	23	69	7	37	0.7
2017-09-08	25.6	75	1011.4	0.4	29.4	23	16	26	111	7	29	0.6
2017-09-09	25.3	79	1010.9	0.5	26.4	23.6	25	35	101	8	24	0.7
2017-09-10	28.2	77	1008.7	0.5	33.3	25	25	39	127	8	24	0.6
2017-09-11	26.1	88	1007.7	0.2	29.3	23.5	22	27	73	7	36	0.9
2017-09-12	25.4	72	1014.8	0.6	28.8	22.8	22	37	127	7	23	0.7
2017-09-13	25.9	62	1017	1	29.7	23.7	30	44	132	7	19	0.7
2017-09-14	25.6	59	1014.4	1.2	28.7	23.7	15	38	130	7	15	0.5
2017-09-15	24.3	86	1011.4	0.5	26	22.8	14	34	79	5	16	0.5
2017-09-16	24.6	69	1010.5	0.8	27.8	22.1	13	34	113	7	16	0.5
2017-09-17	24.3	64	1010	0.5	28.7	20.5	17	40	119	8	29	0.6
2017-09-18	26.3	56	1010.8	0.3	31.8	22.1	51	83	206	12	50	0.9
2017-09-19	26.2	70	1010.5	0.4	29.5	24	63	81	181	10	44	0.8
2017-09-20	22.1	83	1012.4	0.6	27.1	19.3	23	24	96	7	32	0.6
2017-09-21	21.3	89	1012.5	0.4	22.9	19.5	15	22	92	7	36	0.6
2017-09-22	23.1	78	1012.6	0.2	25.4	21.6	24	44	60	10	61	0.7
2017-09-23	21.5	83	1015.3	0.2	23.4	20.2	26	31	89	9	45	0.6
2017-09-24	21.5	95	1013.1	0.2	23.2	20	11	11	71	6	33	0.6
2017-09-25	23.7	97	1009.2	0.2	24.2	22.8	11	12	41	6	41	0.7
2017-09-26	26.8	89	1007.8	0.1	32.4	23.9	49	62	138	9	54	1.1
2017-09-27	26.1	81	1008.5	0.4	28.2	24.2	44	44	99	8	32	0.9
2017-09-28	22.5	71	1013.2	0.3	24.2	19.6	15	42	70	9	46	0.6
2017-09-29	22.1	66	1017.5	0	25.8	18.4	17	42	111	9	50	0.6
2017-09-30	21.2	84	1018.5	0.3	23.2	20.4	13	26	81	7	35	0.5
2017-10-01	25.6	83	1011.7	0.4	31.2	19.9	21	42	110	7	26	0.6
2017-10-02	24.5	92	1010.7	0.3	26.6	21.8	24	34	79	8	31	0.8
2017-10-03	22.3	70	1018.5	0.8	23.5	21.3	10	47	84	6	15	0.4
2017-10-04	20.7	62	1022.4	0.7	22.4	19.3	8	32	88	6	15	0.4
2017-10-05	19.3	73	1019.5	0.4	20.2	18.1	15	31	76	7	31	0.5
2017-10-06	19.9	73	1018.5	0.3	23.3	17.7	50	62	93	14	48	1.1
2017-10-07	21.6	68	1019.2	0.4	26	18.3	45	51	129	10	42	0.8
2017-10-08	23.1	76	1019.7	0.4	27.5	20.4	21	27	101	9	31	0.6
2017-10-09	24.3	83	1018.9	0.3	28.2	21	22	34	67	8	32	0.6
2017-10-10	26.8	83	1016.8	0.4	30.4	24.4	17	36	76	7	24	0.5
2017-10-11	22.3	89	1018	0.5	27	19.5	14	19	70	6	24	0.7
2017-10-12	18.8	78	1020.2	0.7	20.1	17.8	12	28	83	6	25	0.5
2017-10-13	18.8	65	1020.5	0.8	20	17.8	9	28	83	6	20	0.4
2017-10-14	20	61	1020.2	1.1	22	18.3	12	35	102	7	18	0.5
2017-10-15	17.7	88	1020	1.3	18.6	16.6	7	12	94	6	14	0.5
2017-10-16	18.5	92	1019.7	1.1	19.1	17	7	14	81	6	16	0.5
2017-10-17	18.7	77	1022.1	0.6	20.1	17	15	38	85	7	25	0.5
2017-10-18	19.9	78	1019.7	0.4	22.7	18.4	20	42	84	8	30	0.6
2017-10-19	18.9	74	1018.3	0.5	20.8	17.3	23	38	74	10	34	0.6
2017-10-20	19.4	68	1018	0.6	21.7	18.2	17	32	100	8	28	0.6
2017-10-21	18.7	68	1017.3	0.6	21.7	16.5	28	45	132	9	25	0.8
2017-10-22	18.4	70	1014.6	0.8	21.8	15.5	58	73	131	9	27	1
2017-10-23	16.9	69	1018.9	0.6	18.6	14.5	30	62	78	11	37	0.7
2017-10-24	16.2	61	1024.8	0.5	19.7	12.9	21	48	97	10	38	0.6
2017-10-25	16.8	67	1025.1	0.4	21	13.3	24	44	110	8	52	0.7
2017-10-26	18.2	68	1020.8	0.3	21.9	15.3	26	38	93	11	54	0.6
2017-10-27	18.4	69	1018.5	0.4	21.3	15.9	28	41	113	10	52	0.6
2017-10-28	18.3	68	1018.5	0.7	21.9	15.9	31	48	127	9	29	0.7
2017-10-29	16.5	72	1023.6	0.8	19.3	14.4	46	72	89	8	27	0.8
2017-10-30	13.6	54	1029.5	0.6	15.9	10.9	15	42	73	8	27	0.5
2017-10-31	14.7	57	1026.4	0.3	18.8	11.1	18	42	78	8	52	0.6
2017-11-01	16.6	67	1021.1	0.3	21.8	13.2	24	49	96	10	53	0.7
2017-11-02	18.1	70	1017.9	0.1	23.5	14.5	46	70	101	12	73	0.8
2017-11-03	18.2	73	1021.3	0.4	23.2	15.3	87	113	126	17	68	1.2
2017-11-04	14	51	1031.2	0.9	16.9	12.2	11	32	74	7	19	0.5
2017-11-05	13.9	57	1028.8	0.3	16.2	11.9	16	37	71	8	43	0.6
2017-11-06	17.1	76	1022.4	0.2	22	13.3	32	59	74	10	61	0.8
2017-11-07	19.4	80	1020	0.1	21.3	18.2	92	125	34	16	108	1.3
2017-11-08	18.4	62	1022.3	0.5	22	16.1	93	134	120	21	68	1.3
2017-11-09	16.9	63	1022.9	0.4	20.9	14.2	16	42	78	9	48	0.5
2017-11-10	17	74	1018.2	0.3	19.8	14.8	41	76	60	12	54	0.7
2017-11-11	15.1	55	1023.1	0.7	17.2	12.9	15	47	75	9	32	0.5
2017-11-12	15.3	60	1020.5	0.4	18.5	13.2	16	52	69	10	45	0.5
2017-11-13	16.5	72	1017.6	0.2	20	14.3	26	49	63	9	52	0.6
2017-11-14	16	85	1019.2	0.3	18	14.6	42	51	58	10	60	0.7
2017-11-15	16.4	69	1021.3	0.5	18.1	15.4	29	66	81	10	57	0.7
2017-11-16	14.6	88	1020.8	0.3	15.8	13.8	22	29	67	8	42	0.6
2017-11-17	16.6	95	1013.9	0.5	17.8	14.3	9	13	71	7	30	0.6
2017-11-18	11.5	71	1023	1	16.5	8.3	15	35	75	7	18	0.5
2017-11-19	8.3	63	1028.5	0.4	11.7	5.4	26	42	65	9	30	0.6
2017-11-20	9.8	67	1028	0.4	11	8.4	18	26	68	8	37	0.6
2017-11-21	10.5	77	1025.4	0.3	12.6	8.5	48	52	30	10	69	0.8
2017-11-22	11.6	82	1021.4	0.4	13.6	9.9	63	63	78	12	48	0.9
2017-11-23	10.3	47	1026	0.4	12.7	8.1	37	94	61	15	64	0.8
2017-11-24	10	47	1027.8	0.1	14	6.6	67	117	46	21	98	1.1
2017-11-25	12.3	49	1026.4	0.2	15.6	10	54	85	72	16	80	0.8
2017-11-26	13.5	62	1024.8	0.3	17.3	10.5	66	97	68	18	67	0.9
2017-11-27	13.7	69	1024.7	0.5	16.6	11.3	31	64	94	12	45	0.6
2017-11-28	14.6	80	1020.8	0.2	18.6	13	57	78	60	12	80	0.9
2017-11-29	13.9	80	1024.4	0.6	14.6	12.4	79	100	64	10	48	0.9
2017-11-30	10.3	67	1027.9	0.8	12.4	8.9	18	46	69	7	26	0.5
2017-12-01	9.6	57	1030.3	0.7	11.3	8.3	35	71	84	10	31	0.6
2017-12-02	9.9	63	1027.5	0.3	12.1	7.5	29	49	38	11	67	0.7
2017-12-03	12.9	68	1023.4	0.2	15.6	11.3	42	57	33	15	74	0.9
2017-12-04	11.1	71	1025	0.5	13.4	8.3	82	85	78	12	46	0.9
2017-12-05	6.7	43	1027.9	0.6	8.3	4.7	37	60	55	16	51	0.9
2017-12-06	6.7	42	1024.7	0.2	10.6	3.6	55	78	65	17	85	1.1
2017-12-07	8.2	59	1023.4	0.2	10.9	5.6	90	105	46	19	96	1.3
2017-12-08	7	48	1028.5	0.6	9.5	5.1	30	51	56	12	47	0.7
2017-12-09	5.4	41	1024.1	0.3	9.4	2.3	48	72	49	19	76	1
2017-12-10	8.3	51	1019.7	0.2	12.2	5.7	74	110	54	21	77	1.1
2017-12-11	7.7	49	1025.5	0.2	11	4.5	71	95	50	18	85	1.2
2017-12-12	7.5	57	1028.8	0.8	9.6	6.2	19	36	72	9	40	0.6
2017-12-13	8	57	1029.4	0.8	10.7	6.1	20	36	77	9	35	0.6
2017-12-14	8.3	67	1028.9	0.9	9.1	7.2	20	33	57	7	36	0.6
2017-12-15	8.7	79	1026.6	0.6	9.4	7.4	20	27	49	7	42	0.6
2017-12-16	6.3	67	1031.9	0.8	7.5	4.1	60	66	57	10	39	0.9
2017-12-17	2.8	41	1035.3	0.5	4.9	0.6	46	70	56	16	56	0.9
2017-12-18	3.3	39	1032.9	0.2	6.8	0.5	50	80	45	18	80	1.1
2017-12-19	5.4	50	1034.3	0.6	9.4	2.5	43	72	62	16	62	1
2017-12-20	5.9	53	1033.8	0.2	10.6	2.1	48	85	41	17	83	1
2017-12-21	7	46	1032.4	0.3	10.9	3.3	74	101	43	19	86	1.1
2017-12-22	8.3	61	1026.4	0.2	13.7	4.8	68	86	67	15	86	0.9
2017-12-23	12.1	80	1020.9	0.4	17	8.5	52	51	72	12	58	0.7
2017-12-24	11.7	53	1020.2	0.6	14.9	8.9	122	160	69	25	82	1.3
2017-12-25	7.2	43	1027.1	0.5	9.4	4.8	47	103	69	15	61	0.9
2017-12-26	7.3	54	1027.5	0.4	11	4.8	38	67	57	14	73	0.8
2017-12-27	7.9	65	1029.2	0.5	11.1	5.4	37	63	78	12	57	0.7
2017-12-28	9.7	81	1026.1	0.5	10.6	8.5	19	26	56	8	51	0.6
2017-12-29	10.9	86	1027.2	0.4	12.6	9.5	33	41	53	11	61	0.7
2017-12-30	10.3	83	1026.6	0.4	11.6	8.9	71	74	45	11	61	0.9
2017-12-31	7.3	69	1028.2	0.5	9.4	5.2	174	192	65	14	66	1.7
2018-01-01	7.1	61	1027.6	0.4	10.6	4.5	93	95	72	13	63	1.1
2018-01-02	10.5	70	1025.5	0.4	13.2	7.1	27	38	62	10	43	0.7
2018-01-03	8.7	85	1028.2	1.4	12.2	5.6	21	31	76	7	26	0.6
2018-01-04	5.1	89	1026.8	1.3	6	4	8	8	56	6	27	0.5
2018-01-05	4.7	81	1024.5	0.8	5.8	3.8	26	30	54	8	38	0.8
2018-01-06	4.5	72	1025	0.5	7.5	1.7	58	60	49	11	54	1
2018-01-07	8.2	94	1017.8	0.4	10.6	5.7	21	17	44	8	48	1
2018-01-08	4.1	77	1019.2	0.6	5.7	2.9	94	87	65	12	47	1.3
2018-01-09	2.3	46	1024.8	0.5	5.8	-0.6	28	56	62	13	45	0.8
2018-01-10	3.3	43	1027.3	0.5	5.6	1.5	34	73	55	16	53	0.8
2018-01-11	2.4	39	1031.8	0.6	5	-0.4	45	74	54	21	56	0.9
2018-01-12	-0.1	42	1035.4	0.6	3	-2.8	33	55	43	18	54	0.9
2018-01-13	1.4	46	1033.8	0.3	5.9	-2.1	52	71	33	19	83	1.1
2018-01-14	6.4	63	1027.7	0.4	11.7	2.6	31	43	60	13	61	0.7
2018-01-15	8.8	79	1023.3	0.3	15	4.4	37	45	47	15	72	0.9
2018-01-16	11.8	88	1016.4	0.4	15	9.6	70	69	25	11	70	0.9
2018-01-17	10.1	76	1018.8	0.5	12.4	8.7	101	88	39	11	62	1.2
2018-01-18	8.7	73	1023.3	0.7	10.5	8	78	66	64	10	56	0.8
2018-01-19	8.7	75	1024.2	0.6	9.2	7.7	122	127	55	14	74	1.1
2018-01-20	8.1	71	1023	0.5	9.1	7.2	84	99	57	14	71	1
2018-01-21	8.1	77	1021.1	0.7	9.7	7	37	47	75	12	54	0.7
2018-01-22	7.1	83	1019.3	0.4	10.4	5.3	49	55	57	10	64	0.9
2018-01-23	6.3	73	1023.1	0.8	8.1	4.1	83	82	61	9	36	0.9
2018-01-24	2.7	57	1028	1.2	4.9	1.2	20	31	72	8	23	0.5
2018-01-25	1.2	89	1028.4	1	2.4	0.6	11	12	58	6	31	0.5
2018-01-26	0.4	77	1031.8	0.5	1.1	-0.1	14	22	64	7	22	0.4
2018-01-27	1.3	79	1028	0.5	2.6	-0.1	16	22	51	7	38	0.5
2018-01-28	2.7	90	1024.3	0.7	3.3	2.1	22	23	57	7	31	0.5
2018-01-29	0.4	57	1029.5	0.7	2.5	-1.7	97	97	72	20	48	1.1
2018-01-30	0.3	57	1029.6	0.4	3.9	-2.5	191	185	78	28	97	1.8
2018-01-31	2.1	57	1029.3	0.4	3.5	0.6	174	168	59	25	108	1.7
2018-02-01	2.5	53	1029.7	0.6	6.8	-1.1	124	119	75	24	87	1.5
2018-02-02	4.4	48	1030.9	0.4	8	1.6	103	111	81	24	83	1.2
2018-02-03	1.2	53	1034.3	1.2	4.2	-0.8	30	39	68	10	29	0.6
2018-02-04	0.3	40	1034.4	0.8	3.4	-2.1	36	48	71	15	39	0.7
2018-02-05	1.4	39	1032.2	0.4	5.5	-1.8	57	78	67	20	69	0.9
2018-02-06	1.7	47	1030.2	0.6	4.7	-0.2	30	42	64	13	47	0.7
2018-02-07	2.1	53	1026.8	0.5	7.1	-1.6	25	41	69	12	61	0.6
2018-02-08	3.4	54	1024.9	0.5	7.2	0.7	84	94	60	17	61	1.1
2018-02-09	5.8	63	1020.9	0.4	10.2	2.1	61	61	69	13	64	0.9
2018-02-10	6.5	70	1024	0.6	8.1	4.1	65	89	68	12	46	0.9
2018-02-11	4.5	48	1028.6	0.5	9.3	0.8	43	140	81	14	44	0.8
2018-02-12	4.5	27	1029.7	0.6	8.2	-0.1	33	124	77	15	37	0.7
2018-02-13	5.8	36	1026.3	0.4	12	1.1	32	61	105	13	48	0.7
2018-02-14	10.2	54	1018.1	0.3	18.3	5.1	38	74	105	13	55	0.8
2018-02-15	8.8	70	1019.7	1	12.5	5.9	33	53	81	10	29	0.6
2018-02-16	5.2	82	1020.5	0.6	6	4.3	19	27	72	8	27	0.5
2018-02-17	6.1	72	1024.4	0.6	10.3	2.9	36	47	111	11	28	0.6
2018-02-18	7.8	80	1020.6	0.7	10.4	5.5	15	29	82	9	25	0.4
2018-02-19	7.1	93	1020.8	0.7	8.2	5.6	22	24	91	8	24	0.5
2018-02-20	6.9	79	1021.9	0.9	8.3	4.7	42	48	89	9	23	0.6
2018-02-21	6	80	1024.4	0.7	8.1	4.4	34	46	89	9	24	0.6
2018-02-22	6.7	69	1024.7	0.3	9.5	4.6	47	57	78	11	39	0.8
2018-02-23	7.7	68	1023.9	0.4	13.7	3.6	49	46	101	10	34	0.7
2018-02-24	9.5	75	1022.7	0.7	14.2	6.8	36	36	90	10	34	0.6
2018-02-25	9.1	81	1024.9	0.7	11.3	7	32	40	90	9	29	0.6
2018-02-26	8.9	65	1025	0.6	14.3	4.8	38	44	92	11	43	0.6
2018-02-27	11	70	1019.8	0.7	16.6	7.1	37	44	120	11	28	0.5
2018-02-28	12.7	83	1009.2	0.6	14	10.9	32	31	73	8	39	0.6
2018-03-01	10.2	74	1016.6	0.8	13.5	7.9	66	67	101	11	44	0.8
2018-03-02	7.6	77	1017.6	0.8	9	5.9	20	36	82	8	28	0.4
2018-03-03	12	90	1011	0.5	15.7	9	28	25	71	8	37	0.6
2018-03-04	16.7	84	1007.9	0.7	23.5	12.1	30	29	108	10	30	0.6
2018-03-05	10.1	77	1017.1	1.3	20	7.1	17	35	87	8	22	0.4
2018-03-06	8.1	65	1027.7	1.1	12.2	5.4	18	38	94	7	21	0.4
2018-03-07	8.8	84	1023.5	0.9	9.7	8	20	27	72	8	34	0.4
2018-03-08	7.9	72	1024.6	1.1	10.3	5.3	46	58	84	8	27	0.6
2018-03-09	5.3	54	1028.2	0.8	10.7	1.4	38	49	74	11	44	0.6
2018-03-10	9.3	61	1024.9	0.6	16.4	4.4	65	67	135	13	55	0.7
2018-03-11	11.8	62	1023.6	0.6	19.2	6.6	60	56	122	11	53	0.6
2018-03-12	14.7	60	1019.6	0.8	21.3	10.6	23	37	109	14	41	0.5
2018-03-13	17.4	72	1016.7	0.7	23.9	12.5	22	37	108	14	38	0.5
2018-03-14	18.2	79	1014.9	0.7	22.6	15.3	18	33	76	14	29	0.5
2018-03-15	17.2	90	1012.8	0.4	18.7	16	40	43	42	12	61	0.7
2018-03-16	9.1	74	1022.4	1.2	17.5	7.9	22	43	87	8	23	0.4
2018-03-17	10.5	71	1024.8	0.8	13.4	8	17	37	92	7	25	0.4
2018-03-18	12.9	77	1016	0.5	16	10.5	27	47	77	10	51	0.6
2018-03-19	10.1	87	1015.7	0.8	13.8	8.5	27	30	72	8	34	0.5
2018-03-20	7.6	82	1017	0.5	8.6	6.1	46	38	60	9	48	0.8
2018-03-21	6.1	87	1019.2	0.5	7.3	4.8	29	29	48	8	48	0.7
2018-03-22	10	65	1018.5	0.3	15.6	6.1	78	78	92	14	67	0.9
2018-03-23	13.3	67	1019	0.4	20	8.1	88	87	127	14	61	0.8
2018-03-24	15.5	60	1021.2	0.4	22.4	10.5	58	77	116	15	62	0.7
2018-03-25	16.4	67	1022.6	0.5	20.6	12.8	68	79	142	14	47	0.6
2018-03-26	16.8	64	1020.9	0.4	21.8	12.7	59	65	119	16	50	0.6
2018-03-27	16.8	69	1018.4	0.5	22.8	12.2	57	57	124	14	48	0.6
2018-03-28	18.1	64	1015.8	0.7	25.8	12.9	43	55	138	12	47	0.6
2018-03-29	18.7	69	1016.7	0.6	25.1	14	24	44	80	9	43	0.5
2018-03-30	17	82	1020.4	0.9	21.4	14.5	24	33	47	8	42	0.5
2018-03-31	16.8	67	1018.5	0.7	24	11.9	30	51	115	9	34	0.5
2018-04-01	20.2	68	1014	0.8	26.7	15.3	39	89	139	14	35	0.5
2018-04-02	20.2	75	1012.2	0.6	23.8	17.3	42	106	63	15	55	0.6
2018-04-03	21.7	73	1012	0.7	26.6	18.4	30	81	102	13	30	0.5
2018-04-04	15.8	84	1015	0.7	21.5	11.7	29	47	76	8	31	0.5
2018-04-05	12.2	85	1015.1	0.6	14.4	9.1	25	29	69	7	33	0.5
2018-04-06	11.2	66	1020.3	0.8	15.9	7.7	48	131	92	10	32	0.8
2018-04-07	11.7	32	1025.3	0.6	15.3	8.1	23	76	100	11	35	0.5
2018-04-08	14.4	39	1019.2	0.5	22	8.5	33	86	130	13	53	0.6
2018-04-09	18.8	45	1016.2	0.4	26.1	13	37	89	135	14	56	0.6
2018-04-10	21	58	1010.6	0.7	28.1	15.8	25	59	139	12	39	0.6
2018-04-11	21.1	53	1010.8	0.8	27.2	18.2	52	145	135	17	63	0.8
2018-04-12	18	55	1014.2	0.8	21.8	16.3	24	66	87	13	40	0.5
2018-04-13	16.9	68	1014.5	0.8	17.9	16.1	19	47	96	10	35	0.5
2018-04-14	14.7	86	1011.8	0.5	18.3	12.3	31	32	69	7	42	0.6
2018-04-15	14.9	59	1018.7	0.5	19.6	11.7	53	102	139	12	43	0.7
2018-04-16	13.8	52	1020.8	0.4	16.4	11.7	21	152	80	11	51	0.5
2018-04-17	14.5	49	1020.3	0.4	21.8	9.6	33	64	105	13	55	0.5
2018-04-18	17.1	57	1017.3	0.6	24.8	11.7	41	68	156	12	48	0.5
2018-04-19	20	58	1015.5	0.6	27.5	14.4	35	70	150	11	44	0.5
2018-04-20	20.5	68	1015.7	0.8	27	16.4	24	64	115	9	25	0.4
2018-04-21	20.9	75	1013.2	0.7	24.7	18	26	62	98	11	25	0.5
2018-04-22	23.8	73	1009.7	0.6	28.8	20.3	28	51	121	12	36	0.6
2018-04-23	20.5	87	1008	0.6	24.6	14.4	36	37	78	9	39	0.6
2018-04-24	13.6	83	1013.6	0.8	15.2	12.7	22	28	96	7	31	0.5
2018-04-25	16.5	59	1015.8	0.6	22.1	12.2	47	54	140	12	52	0.7
2018-04-26	18.3	50	1014.9	0.4	24	14.2	28	43	87	14	59	0.5
2018-04-27	20.8	51	1016.5	0.5	27.1	15.9	75	90	210	17	60	0.8
2018-04-28	21.2	57	1017	0.5	27.9	16.6	100	117	194	16	59	0.8
2018-04-29	22.2	63	1011.3	0.7	28.5	17.9	79	81	225	15	43	0.7
2018-04-30	25	72	1010.2	0.3	30.1	21.4	74	77	207	13	49	0.9
2018-05-01	24.8	74	1009.3	0.4	31.2	21.7	45	48	131	10	53	0.8
2018-05-02	22.1	80	1011.3	0.6	25.4	16.7	53	52	127	8	38	0.8
2018-05-03	19.4	47	1018.4	0.4	25.8	14.2	31	49	165	10	43	0.5
2018-05-04	21.2	48	1017.8	0.6	27.8	16.5	40	64	187	14	44	0.5
2018-05-05	20	66	1013.8	0.4	21.7	17.5	24	39	115	9	35	0.4
2018-05-06	23.5	83	1005.5	0.3	27.6	20.2	41	51	106	11	40	0.6
2018-05-07	21	80	1005.4	0.5	25.3	17.9	29	33	85	8	31	0.6
2018-05-08	19.2	73	1011.1	0.5	24.5	16.7	32	48	123	10	38	0.6
2018-05-09	18.8	61	1019.1	0.6	23.3	15.1	30	54	127	9	33	0.5
2018-05-10	18.2	63	1021.4	0.6	22.6	15.1	21	44	137	7	24	0.4
2018-05-11	20.3	68	1014.9	0.7	26.2	15.7	20	48	135	9	25	0.4
2018-05-12	23.7	74	1009	0.4	29	21	70	87	137	14	65	0.8
2018-05-13	23.9	78	1009.4	0.4	29.5	20.7	71	52	137	10	41	0.9
2018-05-14	24.7	74	1008.8	0.6	31.3	19.8	52	52	170	10	30	0.7
2018-05-15	27.8	73	1004.7	0.8	34.2	23.6	47	60	177	14	28	0.6
2018-05-16	29.2	69	1002.5	0.9	35.4	24.8	39	60	193	15	33	0.6
2018-05-17	29.7	64	1002.1	0.5	35.7	25.1	35	57	167	13	41	0.6
2018-05-18	27.5	75	1005.4	0.5	31.9	24.5	46	52	147	10	43	0.7
2018-05-19	21	87	1009.7	0.6	24.5	20	27	23	88	6	27	0.5
2018-05-20	19.3	91	1011.3	0.7	20.7	18.4	12	26	86	6	21	0.4
2018-05-21	19.7	91	1012.8	0.3	21	18.4	19	34	77	7	26	0.4
2018-05-22	21.7	91	1010.1	0.2	24.9	20	23	37	76	7	28	0.6
2018-05-23	22.1	53	1013	0.4	27.2	18	32	106	145	11	32	0.6
2018-05-24	22.1	48	1010.8	0.3	28.1	17.9	31	111	119	10	35	0.4
2018-05-25	20.9	82	1004.6	0.3	22.3	18	23	43	89	7	36	0.5
2018-05-26	22	93	1005.2	0.3	22.9	20.7	29	29	85	9	30	0.6
2018-05-27	21.9	86	1009.5	0.2	25.4	19.8	34	41	76	9	38	0.5
2018-05-28	24.8	75	1009.2	0.2	29.7	21.5	73	73	153	13	43	0.8
2018-05-29	24.2	82	1010.2	0.3	26.7	22.3	100	88	113	17	62	0.8
2018-05-30	24.6	83	1010.4	0.2	26.7	23.1	80	62	71	13	53	0.8
2018-05-31	22	83	1013	0.2	24.7	18.9	48	47	134	10	54	0.6
2018-06-01	22.5	63	1015.2	0.4	27.2	18.9	37	39	146	11	39	0.5
2018-06-02	22.9	61	1014.4	0.4	28.3	19.2	32	38	146	11	30	0.5
2018-06-03	22.6	67	1011.8	0.3	25.2	20.5	33	37	127	9	24	0.5
2018-06-04	24	73	1010.1	0.3	27.5	21.1	35	47	127	10	35	0.5
2018-06-05	24.4	74	1010.4	0.1	27.1	22.5	79	71	183	11	58	0.8
2018-06-06	24.7	70	1010.6	0.3	29.9	21.8	51	45	197	11	28	0.6
2018-06-07	24.6	72	1010.4	0.4	29.2	21.9	26	31	131	8	23	0.5
2018-06-08	24.5	73	1008.4	0.4	28.7	21.9	23	29	103	10	30	0.5
2018-06-09	23.5	73	1004.3	0.5	26.7	21.8	23	31	99	8	23	0.4
2018-06-10	23.2	76	1002.3	0.2	26.2	21.3	40	47	120	9	34	0.6
2018-06-11	25.2	65	1001.4	0.3	30.2	21.5	57	60	210	10	39	0.8
2018-06-12	26.6	62	1003.2	0.3	32.9	22.1	61	67	249	14	40	0.8
2018-06-13	27.9	57	1002.1	0.5	33.2	24	47	61	215	14	29	0.7
2018-06-14	26.8	64	1002.1	0.5	31	23.7	28	34	131	8	19	0.5
2018-06-15	25.9	64	1005	0.5	30.1	22.8	18	28	126	9	21	0.4
2018-06-16	24.1	67	1009	0.5	27.1	22.6	22	39	101	8	16	0.4
2018-06-17	24.8	70	1007.5	0.5	28.7	22.2	22	39	110	8	16	0.4
2018-06-18	27.1	71	1004.1	0.3	32.1	24.1	19	31	114	7	14	0.4
2018-06-19	27.5	82	1000.3	0.3	31.5	25.8	23	25	79	8	25	0.5
2018-06-20	22.7	91	1003.8	0.5	26.3	21.2	13	14	90	7	27	0.4
2018-06-21	24.2	74	1007.6	0.4	29.6	21	19	23	109	8	26	0.4
2018-06-22	22.7	83	1007.7	0.2	24.4	19.9	23	27	84	7	26	0.4
2018-06-23	21.1	84	1006.6	0.2	24.9	18.5	12	17	120	7	22	0.4
2018-06-24	23.3	83	1008.1	0.2	26.2	20.9	19	23	104	6	20	0.4
2018-06-25	27.6	84	1007.5	0.2	33.7	23.7	36	39	172	9	28	0.6
2018-06-26	31.4	71	1005.9	0.4	36.7	27.1	39	53	183	12	33	0.6
2018-06-27	32.3	63	1004.5	0.3	36.6	29	31	47	137	10	34	0.6
2018-06-28	31.2	66	1001.1	0.3	34.4	27.4	29	44	112	10	41	0.6
2018-06-29	28	80	1001.3	0.4	30.5	25.9	30	31	118	9	36	0.7
2018-06-30	26.3	87	1003.3	0.3	27.5	24.7	18	24	59	9	30	0.5
2018-07-01	26.6	90	1003.5	0.2	28.8	24.2	14	21	61	8	25	0.5
2018-07-02	28.4	80	1001.7	0.3	32.4	26.3	14	27	50	7	18	0.4
2018-07-03	28.1	79	998.7	0.2	30	26.1	16	28	48	9	28	0.4
2018-07-04	27.9	84	998.5	0.2	32.5	26.2	36	40	120	11	34	0.5
2018-07-05	26.3	97	998.9	0.2	27.8	25	25	25	49	7	31	0.5
2018-07-06	26.9	90	1000.3	0.2	28.7	25.2	14	20	55	8	27	0.5
2018-07-07	26.5	91	1003.3	0.3	27.2	25.9	13	23	55	7	20	0.4
2018-07-08	28.7	83	1004.6	0.2	33.7	25.9	25	42	134	8	22	0.4
2018-07-09	29.9	74	1006.9	0.5	33.5	27.1	14	29	99	8	18	0.4
2018-07-10	29.7	72	1009	0.5	33.7	26.9	10	27	49	7	13	0.3
2018-07-11	28.8	78	1008.2	0.4	31.3	27.5	12	36	34	6	12	0.4
2018-07-12	29.4	76	1008.1	0.5	33.2	27.4	9	27	67	5	12	0.4
2018-07-13	29.8	72	1009	0.6	33.6	27.1	9	25	79	6	14	0.4
2018-07-14	29.7	67	1008.5	0.6	33.7	26.7	9	25	92	7	15	0.4
2018-07-15	29.6	68	1008.7	0.5	33.8	26.7	9	24	87	7	14	0.4
2018-07-16	29.6	69	1009.2	0.6	33.5	26.9	8	21	73	6	13	0.3
2018-07-17	30	71	1009	0.5	34.5	27.1	8	22	55	6	15	0.4
2018-07-18	29.8	69	1008.4	0.5	34.7	26.8	8	22	65	6	13	0.3
2018-07-19	30	68	1008.2	0.5	34.8	27	8	20	59	6	13	0.3
2018-07-20	29.9	69	1006.8	0.4	33.8	27.1	23	38	70	9	16	0.3
2018-07-21	29.8	74	1004.9	0.5	33.6	27.8	20	34	51	8	13	0.4
2018-07-22	27.3	89	995.6	0.7	29.7	25.6	9	15	39	5	10	0.3
2018-07-23	29.5	79	1000.9	0.4	33.2	27.1	12	26	61	6	14	0.4
2018-07-24	29.4	85	1002.6	0.2	35	27.1	26	39	168	7	25	0.5
2018-07-25	32.1	72	1004.3	0.2	37.7	28.5	36	55	184	8	26	0.5
2018-07-26	30.1	82	1005	0.3	36.1	25.9	35	53	114	8	52	0.7
2018-07-27	30.6	72	1005.8	0.2	36.3	27	41	59	231	10	47	0.7
2018-07-28	31.7	71	1005.7	0.2	36.2	28.8	41	52	186	11	29	0.6
2018-07-29	32.1	68	1004.3	0.4	36.6	28.6	41	51	140	11	29	0.6
2018-07-30	32.1	64	1003.2	0.3	36	29.3	32	45	130	7	28	0.6
2018-07-31	30.5	69	1003.7	0.3	34.8	27.7	19	32	90	9	26	0.5
2018-08-01	30.7	68	1003.5	0.4	34.5	27.9	15	25	106	7	19	0.4
2018-08-02	30.3	72	1002.5	0.6	33.3	28.5	18	30	85	7	15	0.4
2018-08-03	27	93	997.1	0.6	30	26.2	11	19	69	4	17	0.5
2018-08-04	30	80	1003.1	0.3	34.3	26.8	19	34	121	5	16	0.5
2018-08-05	31	74	1005.1	0.4	35.3	28.1	18	32	134	6	17	0.5
2018-08-06	31.2	75	1005	0.3	35.2	28.6	19	33	135	6	20	0.5
2018-08-07	31.1	73	1005.4	0.3	35.1	28.4	15	25	95	6	20	0.4
2018-08-08	31	71	1006	0.3	35.8	28	20	30	108	6	20	0.4
2018-08-09	31.1	68	1005.6	0.3	35.6	28.1	20	34	122	7	21	0.5
2018-08-10	31.7	65	1004.3	0.3	36.8	28.1	27	40	142	7	27	0.5
2018-08-11	31.5	65	1002.2	0.4	35.3	29.6	22	33	123	6	22	0.6
2018-08-12	28.2	86	1000.6	0.3	30.7	25.9	13	22	60	5	19	0.5
2018-08-13	29.1	85	1000	0.4	32.5	26.5	9	24	68	4	11	0.4
2018-08-14	29.8	79	1004.2	0.3	32.7	28	9	27	34	5	14	0.4
2018-08-15	29.9	79	1003.9	0.4	34.1	27.8	13	27	55	7	16	0.4
2018-08-16	28.9	81	999.5	0.5	31.6	26.9	8	18	53	5	13	0.4
2018-08-17	26.8	96	993.2	0.6	27.9	26.1	8	19	70	4	12	0.4
2018-08-18	28.9	82	1002.9	0.3	32.2	27.1	8	19	58	5	13	0.4
2018-08-19	29.4	77	1004.2	0.4	32.3	27.8	7	21	60	4	12	0.4
2018-08-20	30.1	77	1002.2	0.4	32.7	28.3	10	25	94	5	15	0.4
2018-08-21	28.8	86	1001.2	0.2	30.2	27.1	16	23	59	6	35	0.5
2018-08-22	29.5	76	1001.2	0.3	33.3	27.2	14	26	88	6	20	0.5
2018-08-23	28.9	69	1000.3	0.3	32.1	26	23	48	148	7	23	0.6
2018-08-24	28.8	58	1003.8	0.3	33.2	25.1	29	57	187	12	34	0.9
2018-08-25	27.2	85	1005.9	0.5	28.5	26	17	26	85	5	23	0.5
2018-08-26	27.5	92	1004.2	0.1	29.1	26.4	13	21	61	4	24	0.5
2018-08-27	29.4	80	1006.7	0.3	33.1	26.9	9	24	71	4	16	0.4
2018-08-28	29.7	74	1007.8	0.5	32.9	27.4	8	22	74	4	14	0.4
2018-08-29	29.8	74	1006.9	0.4	33.7	27.1	9	24	75	5	15	0.4
2018-08-30	30.1	71	1007.3	0.4	33.5	27.5	11	28	95	5	16	0.4
2018-08-31	30.5	68	1007.8	0.4	34.5	27.5	16	35	159	6	22	0.5
2018-09-01	29.1	79	1007.5	0.1	31.8	26.1	33	42	113	6	40	0.7
2018-09-02	28.6	85	1005.5	0.2	32	26.6	37	39	137	6	36	0.7
2018-09-03	30.3	78	1002.3	0.1	34.2	27.7	42	44	145	6	33	0.8
2018-09-04	29.2	65	1002	0.3	32.9	26.8	42	61	177	10	42	1
2018-09-05	28.6	56	1005.9	0.2	33.2	25.3	36	62	210	11	37	0.8
2018-09-06	29.2	70	1005.2	0.3	32.9	26.6	53	77	204	10	30	0.8
2018-09-07	24.9	85	1008.1	0.1	30.1	23	67	61	65	9	62	1.2
2018-09-08	24.8	68	1012.8	0.3	27.4	22.9	15	30	98	6	31	0.5
2018-09-09	25.1	57	1015.8	0.4	29	21.7	14	30	113	6	29	0.5
2018-09-10	24.6	62	1017.7	0.4	26.8	22.3	13	28	110	6	27	0.5
2018-09-11	25.5	66	1015.6	0.2	27.8	23.7	11	35	86	6	30	0.5
2018-09-12	25.1	80	1013.3	0.2	27.4	23.2	12	26	72	6	30	0.5
2018-09-13	26.1	82	1012.4	0.2	28.2	24.7	13	27	61	6	33	0.6
2018-09-14	26.9	77	1013.3	0.1	29.5	24.6	12	26	76	7	42	0.5
2018-09-15	27.7	75	1013.8	0.2	32	24.7	15	26	96	8	27	0.5
2018-09-16	28.6	79	1013.4	0.3	32.9	26.2	11	25	51	6	18	0.5
2018-09-17	26.1	91	1014.8	0.1	28.9	24.1	8	18	33	6	35	0.6
2018-09-18	27.9	82	1015.5	0.1	31	25.7	15	27	57	8	37	0.6
2018-09-19	29.4	77	1011.9	0.2	33.9	26.9	28	42	151	7	44	0.7
2018-09-20	28.1	84	1008.7	0.1	32	25.2	29	38	61	6	58	0.8
2018-09-21	25.1	87	1011.3	0.2	26.7	23.8	30	31	75	6	46	0.9
2018-09-22	25.1	77	1015.6	0.1	26.6	23.8	22	33	93	7	48	0.7
2018-09-23	25.8	70	1016.2	0.1	28.1	24.3	49	69	165	10	42	0.9
2018-09-24	25.6	56	1017.3	0.7	28.6	23.9	26	48	160	8	20	0.6
2018-09-25	23.6	52	1016.9	0.7	25.5	21.2	10	28	103	6	20	0.4
2018-09-26	23.6	57	1015.4	0.7	26.1	21.8	10	30	110	6	21	0.4
2018-09-27	24.1	62	1015.2	0.6	27.3	22	10	28	103	6	23	0.4
2018-09-28	24.2	60	1014.8	0.5	28.1	21	11	29	104	6	31	0.5
2018-09-29	24	62	1012	0.5	26.7	21.9	11	30	103	6	21	0.4
2018-09-30	23.9	60	1010.8	0.4	29.1	20.1	36	67	193	10	32	0.7
2018-10-01	22.3	44	1016.1	0.4	25.3	19.7	18	53	118	11	31	0.6
2018-10-02	21.9	45	1019.2	0.2	26.4	18.5	23	48	137	9	41	0.6
2018-10-03	22.1	53	1020.6	0.4	26	18.9	22	38	134	7	37	0.5
2018-10-04	22.6	54	1019.4	0.6	25.7	20.2	17	35	132	7	19	0.4
2018-10-05	21.1	79	1011.8	0.7	22.1	19.9	16	31	110	6	16	0.5
2018-10-06	21.5	63	1013.7	0.3	25.9	17.8	24	47	122	8	29	0.6
2018-10-07	22	65	1018.5	0.3	26.2	18.3	29	61	186	8	34	0.6
2018-10-08	22.1	67	1018.1	0.3	25.3	19.6	16	45	109	7	28	0.5
2018-10-09	21.6	67	1016	0.1	24.4	19.3	26	54	81	7	57	0.6
2018-10-10	19.3	62	1019.9	0.4	21.4	18	23	43	80	7	26	0.6
2018-10-11	17.6	49	1024.9	0.6	20.3	14.3	16	37	97	7	30	0.4
2018-10-12	18	46	1025.9	0.3	22	15	17	35	98	7	42	0.5
2018-10-13	19.3	51	1023.8	0.4	23.3	16.3	18	32	115	6	43	0.4
2018-10-14	19.2	61	1021.2	0.2	20.9	17.9	13	25	89	6	32	0.4
2018-10-15	19.8	58	1019.3	0.5	23.2	18	12	26	107	7	32	0.4
2018-10-16	16.8	85	1017.5	0.3	19	14.7	22	29	103	6	36	0.5
2018-10-17	18.2	67	1017.7	0.2	22.1	14.8	42	57	142	7	60	0.7
2018-10-18	18	62	1021	0.3	20.3	16.1	19	32	96	6	30	0.4
2018-10-19	16.9	54	1024.8	0.4	20.6	13.3	16	37	98	7	47	0.5
2018-10-20	18.4	64	1024.5	0.2	20.4	16.2	12	29	90	6	42	0.4
2018-10-21	19.1	69	1021.5	0.2	21.4	17.2	15	28	99	7	41	0.4
2018-10-22	17.2	96	1018.2	0.1	19.5	16.3	15	17	70	5	49	0.5
2018-10-23	18.7	78	1019.8	0.2	22	16.9	57	56	114	9	45	0.8
2018-10-24	18.9	73	1020.5	0.1	22.7	15.9	60	77	137	9	60	0.8
2018-10-25	19.3	69	1018.3	0.2	23	16.4	25	58	119	9	35	0.5
2018-10-26	20.5	64	1016.3	0.2	23	19.2	55	76	123	10	43	0.7
2018-10-27	16.7	31	1022.4	0.2	19.9	13.2	31	87	76	13	57	0.6
2018-10-28	17.2	43	1018.1	0.2	23	12.8	39	78	110	15	73	0.7
2018-10-29	18.7	43	1015.9	0.1	24.5	14.3	53	92	107	18	76	0.8
2018-10-30	18.8	65	1020.9	0.3	22.8	15.7	19	40	106	8	41	0.5
2018-10-31	17.7	55	1024.4	0.9	19.6	15.9	18	33	108	8	28	0.5
2018-11-01	15.7	53	1026.7	0.5	18.4	13.1	11	21	87	6	28	0.4
2018-11-02	16.4	56	1026.1	0.3	19.4	13.6	14	28	83	6	43	0.4
2018-11-03	18.2	70	1022.9	0.2	20	16.7	16	28	95	6	41	0.5
2018-11-04	18.5	79	1020.8	0.2	22.1	15.9	22	27	104	7	43	0.6
2018-11-05	19.5	81	1021	0.2	21.6	17.8	25	27	94	7	30	0.4
2018-11-06	18.6	78	1022.1	0.2	19.7	17.7	20	26	102	6	32	0.5
2018-11-07	18.3	94	1020.2	0	19.1	17.1	35	20	48	6	50	0.7
2018-11-08	13.7	90	1018.8	0.1	17.1	11.6	18	16	32	5	36	0.8
2018-11-09	12.8	70	1022.8	0.1	16.8	9.9	53	46	74	9	53	0.8
2018-11-10	14.6	74	1023.6	0.1	19.8	10.6	41	34	99	6	45	0.6
2018-11-11	17.4	80	1019.4	0.1	20.9	15.6	50	48	61	7	50	0.7
2018-11-12	15.5	83	1019.7	0.3	16.5	14.5	16	22	86	5	29	0.5
2018-11-13	14.9	61	1020.9	0.4	17.3	12.1	24	40	90	6	45	0.5
2018-11-14	14.9	66	1021.8	0.2	17.9	12	32	51	97	6	56	0.6
2018-11-15	15.7	80	1020.5	0	17.6	14.5	23	37	48	6	70	0.6
2018-11-16	14.4	94	1020.4	0.2	15.7	13.5	21	21	77	5	34	0.5
2018-11-17	14.6	70	1023.2	0.4	16.8	13.4	15	31	83	5	25	0.4
2018-11-18	12.1	92	1021.5	0.2	14.4	11.3	15	16	60	5	34	0.5
2018-11-19	11.7	81	1023.9	0.1	14.3	9.7	76	70	55	10	61	1
2018-11-20	13.6	77	1023.4	0.1	17.9	10	52	57	84	9	64	0.9
2018-11-21	14.1	96	1019.4	0.1	16.5	13.2	11	13	77	5	40	0.4
2018-11-22	12.6	69	1026.5	0.3	14.5	10.6	32	48	84	7	40	0.6
2018-11-23	12.1	59	1025.9	0.2	16.1	9.1	39	55	84	7	67	0.6
2018-11-24	14.3	71	1023.5	0.1	18.2	11.5	50	64	72	8	63	0.7
2018-11-25	14.6	80	1022.8	0.1	18.2	11.8	81	73	115	8	79	0.9
2018-11-26	16.2	83	1021.7	0.1	19.4	13.6	54	56	83	7	85	0.8
2018-11-27	15.8	81	1023	0	18.4	13.7	77	76	81	8	82	1.1
2018-11-28	14.1	81	1022.7	0	16.3	12.2	124	110	69	10	98	1.4
2018-11-29	14.4	78	1024.7	0.1	18.6	11.3	106	107	117	9	102	1.3
2018-11-30	15.4	82	1024.3	0.1	18.7	13	58	108	95	7	70	0.7
2018-12-01	16.8	82	1021.2	0.1	20.7	14	29	66	75	7	59	0.5
2018-12-02	17.9	95	1017.6	0.1	20.9	16.1	28	38	51	6	46	0.5
2018-12-03	18.1	96	1016.2	0.1	20.2	16.9	53	42	20	6	62	0.8
2018-12-04	15.2	92	1019.5	0.2	17.7	10.8	23	26	54	5	35	0.6
2018-12-05	11.9	75	1024.8	0.4	13.2	10.3	14	57	63	5	30	0.4
2018-12-06	10.8	91	1022.5	0.3	13.3	8.1	12	24	62	5	29	0.4
2018-12-07	5.4	86	1032.4	0.6	8.1	2.1	20	30	55	6	29	0.5
2018-12-08	2.7	75	1035.7	0.4	3.7	1.2	25	40	47	7	35	0.6
2018-12-09	3.1	84	1033.8	0.3	6.4	0.5	28	34	35	6	45	0.6
2018-12-10	8.5	90	1028.1	0.6	10.1	6.4	7	14	59	5	29	0.4
2018-12-11	8.5	94	1026.8	0.4	9.6	6.4	16	19	60	5	35	0.5
2018-12-12	5	71	1032.8	0.5	7.4	2.3	71	71	57	11	50	1.1
2018-12-13	4.6	56	1033.4	0.3	6.6	3.3	70	78	48	14	71	1
2018-12-14	6.1	60	1034.7	0.4	10.3	2.4	51	67	61	10	58	0.8
2018-12-15	9.2	68	1030.8	0.3	10.3	8.1	13	25	44	6	54	0.4
2018-12-16	8	83	1024.4	0.1	9.5	6.4	70	75	51	9	67	1
2018-12-17	7.9	63	1024.7	0.1	12.4	4.8	103	127	60	13	88	1.2
2018-12-18	9	66	1024.2	0.1	14.4	5.1	88	131	52	15	106	1.4
2018-12-19	11.3	65	1020.4	0.2	14.7	8.5	54	102	31	19	104	1
2018-12-20	12.7	77	1019.4	0.4	13.8	11.4	26	38	60	8	67	0.6
2018-12-21	12.3	93	1020.9	0	15	9.7	45	57	19	7	76	0.8
2018-12-22	13.3	98	1020.7	0.2	14	12.5	35	26	54	6	48	0.7
2018-12-23	10.7	77	1026.5	0.6	12.5	9.1	43	56	87	7	35	0.8
2018-12-24	9.7	63	1027.7	0.4	11.6	7.7	26	53	79	7	39	0.6
2018-12-25	10.9	72	1021.5	0.2	13.1	8.9	16	34	47	7	49	0.4
2018-12-26	10.1	95	1020.5	1	12	8.3	12	15	72	5	28	0.5
2018-12-27	6.9	73	1028.3	0.9	8.3	5.5	16	36	67	6	21	0.4
2018-12-28	2.6	54	1036	1.2	5.5	0.1	26	46	60	7	27	0.5
2018-12-29	0.3	56	1039.1	0.7	3.4	-2.4	31	49	54	9	38	0.7
2018-12-30	1.7	66	1039.1	0.6	3.6	0.5	28	40	44	8	41	0.6
2018-12-31	2.5	84	1038.3	0.4	5.1	0.4	27	29	54	6	37	0.5
2019-01-01	4.2	62	1037.4	0.6	5.3	3.4	28	33	68	7	29	0.5
2019-01-02	4.5	61	1036.2	0.5	6.6	3	64	72	68	13	45	0.8
2019-01-03	7.1	65	1033.9	0.4	9	5.2	47	53	55	9	58	0.7
2019-01-04	9.4	89	1028.3	0.2	10.7	8.3	18	20	47	6	60	0.6
2019-01-05	8.3	97	1026.1	0.2	9.6	7.7	32	31	42	6	51	0.7
2019-01-06	7.3	91	1029.2	0.2	8.3	6.5	25	29	57	6	44	0.5
2019-01-07	7.5	83	1028	0.5	8.5	6.9	27	30	48	6	50	0.6
2019-01-08	6.9	77	1030.2	0.5	7.8	6.2	55	54	79	9	42	0.8
2019-01-09	5.2	80	1032.5	0.5	6.2	4.5	22	25	51	6	44	0.6
2019-01-10	6.5	96	1026.7	0.3	7.5	4.9	16	17	38	5	47	0.5
2019-01-11	7.7	97	1023.4	0.2	8.9	6.7	15	15	31	6	56	0.6
2019-01-12	6.9	88	1024.2	0.1	8.6	6.1	42	41	16	8	52	1.1
2019-01-13	6.2	72	1027	0.3	7.9	5.1	78	75	41	8	58	1.1
2019-01-14	7.3	75	1026	0.4	10.7	4.6	71	74	77	8	66	0.9
2019-01-15	7.7	81	1026.8	0.4	9.2	6.6	103	97	92	9	50	1.2
2019-01-16	4.2	59	1030.4	0.7	6.6	2.3	30	59	55	8	44	0.6
2019-01-17	4.5	52	1028.8	0.2	8.5	1.2	77	119	40	13	84	1.1
2019-01-18	6	66	1027.7	0.3	10.4	2.7	82	100	83	11	74	1
2019-01-19	8.5	78	1021.7	0.1	10.8	6.6	77	94	54	11	79	1.1
2019-01-20	7.1	67	1027.3	0.8	9.2	5.2	90	85	75	11	50	0.9
2019-01-21	5.2	53	1029.1	0.4	8.5	2.3	46	66	55	12	70	0.8
2019-01-22	6.5	51	1024.9	0.2	11	3.5	83	103	63	15	86	1.1
2019-01-23	7.7	45	1023.9	0.1	13.1	3.4	94	109	78	16	109	1.2
2019-01-24	8.3	52	1024.8	0.3	12.9	4.7	95	96	89	14	90	1.1
2019-01-25	8.4	71	1026	0.5	12.3	5.9	29	38	84	9	54	0.6
2019-01-26	4.5	54	1033.5	1	7.2	3.1	14	34	66	6	24	0.4
2019-01-27	5.2	57	1030.6	0.6	9.7	1.6	18	37	80	6	46	0.6
2019-01-28	7.2	75	1025.3	0.2	8.6	5.8	55	60	46	10	65	0.9
2019-01-29	8	72	1026.6	0.4	10.1	6.5	40	72	62	7	52	0.7
2019-01-30	10.4	84	1022.7	0.4	13.8	8.2	28	64	50	8	70	0.7
2019-01-31	7	87	1022.7	1.1	11.1	3.9	12	24	82	5	22	0.5
2019-02-01	3.8	67	1029.6	0.3	5.8	2.1	60	70	67	6	32	0.8
2019-02-02	8	79	1019.3	0.3	14	3.4	51	65	88	7	30	0.7
2019-02-03	11	85	1016.8	0.4	13.7	7.3	69	68	42	9	38	1.3
2019-02-04	7.9	69	1026.7	0.6	11.7	5.5	76	133	86	8	30	0.9
2019-02-05	9.8	69	1019.9	0.1	12.2	8.1	19	72	80	7	26	0.4
2019-02-06	11.3	83	1015.1	0.2	16.9	7.5	44	54	85	7	31	0.8
2019-02-07	9.3	86	1019	0.8	13	5.1	24	37	78	5	15	0.6
2019-02-08	3.4	81	1026.3	0.5	5.1	1	10	22	72	5	16	0.4
2019-02-09	3.3	81	1028.6	0.6	5	1.8	11	20	75	5	14	0.4
2019-02-10	3.3	78	1031.2	0.6	4.3	2.3	15	25	71	6	17	0.5
2019-02-11	3.1	65	1033.7	0.5	5	1.2	27	31	70	7	25	0.6
2019-02-12	5.4	81	1030.5	0.5	7.8	2.8	20	25	72	5	31	0.5
2019-02-13	6.8	86	1029.9	0.8	8.9	5.7	23	36	88	5	22	0.6
2019-02-14	5.5	90	1029.2	1	7.7	3.4	25	39	88	5	26	0.6
2019-02-15	6.5	95	1025.1	0.2	7.3	5.1	15	15	68	5	33	0.5
2019-02-16	4.5	73	1028.2	0.5	5.1	3.6	39	57	77	6	22	0.7
2019-02-17	4.8	59	1028.6	0.7	7.4	3.2	26	38	88	7	23	0.6
2019-02-18	5.9	89	1022.9	0.3	7.5	4.6	16	15	66	5	40	0.5
2019-02-19	7.4	89	1020	0.2	8.6	6.3	31	24	32	6	53	0.9
2019-02-20	5.5	94	1025.6	0.4	6.8	4.6	44	33	61	5	42	0.8
2019-02-21	6.9	87	1026.4	0.7	8.1	6	56	55	83	5	36	0.8
2019-02-22	5.5	88	1024	0.3	6.1	4.8	46	39	68	5	42	0.8
2019-02-23	6.3	70	1025.4	0.3	8.7	3.7	123	100	85	9	65	1.2
2019-02-24	8.6	50	1023.5	0.3	13.3	4.4	103	84	110	10	74	1.2
2019-02-25	8.6	59	1022.8	0.3	11.4	6	76	68	82	7	79	1.2
2019-02-26	9	73	1023.6	0.8	13.4	5.9	37	42	96	6	41	0.6
2019-02-27	8.8	86	1019.9	0.7	10.6	8.1	26	39	69	6	48	0.6
2019-02-28	9.1	76	1020.9	0.4	11.3	7.9	31	40	75	7	46	0.6
2019-03-01	9.1	66	1022.7	0.5	11.1	7.1	92	91	113	8	62	0.9
2019-03-02	8	86	1017.9	0.4	9.2	6.3	50	45	91	7	51	0.7
2019-03-03	8.4	74	1014.3	0.1	11.8	6.9	75	81	75	9	65	0.9
2019-03-04	10.1	61	1018.3	0.3	13.6	7.6	96	95	109	10	56	1
2019-03-05	9.7	82	1018.3	0.3	11.6	8.2	81	63	96	7	54	0.8
2019-03-06	11.2	84	1017.7	0.4	14	9.2	81	76	114	7	48	1
2019-03-07	9.5	55	1024.9	0.9	12.3	7.3	66	71	115	6	31	0.8
2019-03-08	8.2	62	1025.1	0.7	12.8	5.1	20	42	91	6	41	0.5
2019-03-09	10.2	95	1017.5	0.1	11.4	8.9	32	28	45	6	79	0.8
2019-03-10	10.1	92	1015	0.3	11.3	9.3	50	49	56	5	54	0.8
2019-03-11	12.4	71	1015.4	0.2	19.1	7.5	71	104	113	9	71	0.9
2019-03-12	13.7	51	1016.6	0.4	21.2	7.9	79	117	114	9	56	0.9
2019-03-13	10.8	56	1024.1	0.6	16.3	6.9	20	69	91	6	39	0.5
2019-03-14	10.1	73	1025	0.4	11	8.9	19	34	86	5	46	0.6
2019-03-15	12.9	66	1023.4	0.3	20.6	7.8	47	61	106	9	55	0.7
2019-03-16	13.4	44	1023.4	0.5	20.4	7.7	40	76	137	9	55	0.7
2019-03-17	15.2	59	1022.1	0.5	22.4	9.8	80	85	156	13	65	0.9
2019-03-18	12.1	84	1019.4	0.3	13.3	11	34	30	98	6	44	0.6
2019-03-19	13.7	67	1017.5	0.5	20	9.2	35	38	115	6	51	0.6
2019-03-20	17.2	73	1007.3	0.6	25.3	12.6	31	51	110	7	46	0.8
2019-03-21	15.9	77	1012.6	0.6	21.4	10.1	55	48	93	6	37	0.9
2019-03-22	9.5	61	1022.5	0.9	12	8.3	16	34	92	5	23	0.5
2019-03-23	11	47	1026.1	0.6	16.4	7.5	28	44	102	8	37	0.7
2019-03-24	11.2	57	1024.2	0.6	15.4	7.6	34	52	122	7	35	0.6
2019-03-25	11.8	75	1018.4	0.3	14.4	9.5	58	55	90	6	65	0.8
2019-03-26	14.6	70	1020.5	0.3	21.1	9.7	61	60	116	9	66	0.9
2019-03-27	15.5	72	1015.4	0.4	21.6	12.4	47	50	91	8	67	0.8
2019-03-28	15.1	91	1012.5	0.3	18.5	13.4	65	54	72	7	76	1
2019-03-29	15.4	79	1013.5	0.4	19.2	12.8	45	58	103	6	50	0.7
2019-03-30	14.7	71	1016.8	0.5	19.8	11.9	57	70	99	8	50	0.8
2019-03-31	11.6	37	1025.8	0.9	15.3	9.4	15	50	104	6	26	0.5
2019-04-01	12.8	38	1026.1	0.3	18.8	8.4	25	58	132	7	43	0.6
2019-04-02	13.6	56	1022.2	0.6	16.9	10.1	30	63	124	7	49	0.7
2019-04-03	15.2	65	1023.3	0.4	19.4	12.7	48	65	93	8	62	0.8
2019-04-04	13.3	83	1021	0.4	15.7	11.5	39	39	98	5	37	0.6
2019-04-05	17.1	68	1014	0.3	23.7	12.5	67	64	172	9	50	0.9
2019-04-06	19.3	60	1011.2	0.3	26	13.8	61	64	151	9	48	0.8
2019-04-07	21.8	61	1008.9	0.4	30.5	15.4	85	94	183	11	57	1
2019-04-08	21	69	1011.1	0.6	28.7	16.8	74	66	135	9	54	0.9
2019-04-09	21.4	88	1005.3	0.5	29.6	15.7	35	36	105	5	29	0.8
2019-04-10	11.7	75	1015.6	0.6	15.7	10.7	19	22	86	5	30	0.7
2019-04-11	11.8	64	1016.7	0.3	13.8	9.7	25	39	107	6	44	0.6
2019-04-12	13.7	58	1019.5	0.3	19.3	9.3	53	58	138	8	62	0.8
2019-04-13	15.2	62	1017.8	0.3	19.8	11.1	26	38	131	6	34	0.5
2019-04-14	16.5	73	1017.8	0.4	19.5	14.4	48	50	117	7	45	0.8
2019-04-15	15.4	51	1020.9	0.4	22	10.6	33	56	115	6	43	0.6
2019-04-16	15.4	61	1015.2	0.4	19	13.5	19	49	108	6	36	0.5
2019-04-17	17	77	1012.3	0.4	23.5	13	44	48	130	5	43	0.6
2019-04-18	20.7	67	1009.8	0.5	28.5	15.4	46	64	176	7	43	0.7
2019-04-19	20.4	84	1010.6	0.4	23.7	18.1	42	45	90	6	47	0.6
2019-04-20	21.1	82	1010.7	0.2	25.1	19.3	19	30	89	5	29	0.5
2019-04-21	20.6	90	1008.7	0.2	23.7	19.2	26	32	52	5	39	0.6
2019-04-22	18.9	99	1010	0.1	19.6	18.3	19	15	43	4	43	0.6
2019-04-23	21.5	91	1007.8	0	25.1	19.3	49	44	87	6	59	1
2019-04-24	22.1	90	1007.7	0.1	24.7	19.6	93	67	58	8	77	1.2
2019-04-25	20.3	79	1008.8	0.3	24.2	17.9	36	36	74	6	48	0.7
2019-04-26	14.8	77	1016	0.4	19.4	12.5	25	38	81	4	36	0.6
2019-04-27	14.7	55	1020.2	0.4	19	11.7	16	34	118	6	27	0.5
2019-04-28	16.5	84	1014.9	0.3	18.5	14.9	31	33	80	5	46	0.6
2019-04-29	17.2	92	1011.1	0.1	18.8	16	37	25	57	9	66	0.9
2019-04-30	15.2	89	1010.9	0.2	16	14.4	24	28	74	5	44	0.6
2019-05-01	18	70	1012.1	0.2	23.3	14.7	59	84	141	9	55	1
2019-05-02	19.1	47	1016.6	0.3	25.2	14	32	97	122	8	58	0.7
2019-05-03	20.4	38	1018.7	0.3	27.8	14.2	30	73	132	7	64	0.6
2019-05-04	21.5	31	1017.8	0.3	28.2	16.6	36	67	150	8	53	0.6
2019-05-05	20.3	63	1014.9	0.5	25.9	16	40	51	146	7	27	0.6
2019-05-06	17.8	58	1018.6	0.9	19.8	15.1	22	42	110	6	22	0.4
2019-05-07	16.4	39	1019.2	0.6	20.6	12.9	13	48	119	6	26	0.4
2019-05-08	17.7	49	1014	0.4	21.4	15.6	17	45	124	6	29	0.4
2019-05-09	19.9	61	1010.7	0.3	26.4	15.2	36	57	190	9	42	0.6
2019-05-10	20.8	65	1011.8	0.4	26.3	17.5	37	51	163	8	35	0.5
2019-05-11	22.3	59	1012.9	0.3	28.6	17.2	41	61	215	9	41	0.6
2019-05-12	22.8	58	1012.9	0.3	29.5	18.1	35	51	173	7	33	0.6
2019-05-13	20.6	67	1011.7	0.3	22.5	18.1	25	36	109	8	32	0.6
2019-05-14	19.1	77	1011.6	0.3	22.7	16.9	22	27	106	6	25	0.6
2019-05-15	20	89	1010.4	0.1	21.7	18.7	20	21	71	6	28	0.6
2019-05-16	20.8	92	1007.2	0.1	23.7	19.1	43	35	53	6	41	0.7
2019-05-17	22.6	90	1004.8	0.1	25	20.6	24	27	67	6	39	0.6
2019-05-18	22.4	82	1004.5	0.3	23.9	20.7	45	41	88	12	45	0.9
2019-05-19	22	78	1006.8	0.2	26.3	19.4	59	58	84	7	48	0.7
2019-05-20	22.5	52	1011.2	0.6	25.5	19.9	30	67	113	7	36	0.5
2019-05-21	22.3	30	1011.9	0.3	28.5	17.6	32	84	187	9	52	0.5
2019-05-22	25	39	1009.2	0.4	31.6	19.1	43	84	220	10	48	0.7
2019-05-23	26.4	42	1010.6	0.3	34.3	20.3	62	101	269	11	54	0.7
2019-05-24	26.5	42	1011.9	0.6	32.8	21.2	34	67	185	7	40	0.5
2019-05-25	24.8	65	1010.3	0.7	28	22.5	23	50	124	5	17	0.5
2019-05-26	21.9	97	1007.5	0.5	24.3	21	22	27	89	5	17	0.5
2019-05-27	23.8	86	1007.4	0.5	30	19.6	28	31	107	5	21	0.7
2019-05-28	21.8	42	1015.6	0.9	26.2	18.2	12	31	114	5	29	0.5
2019-05-29	23.1	34	1014.4	0.3	28.8	19.8	25	47	114	6	73	0.6
2019-05-30	22.1	47	1011.5	0.2	25.1	19.9	25	44	142	6	45	0.5
2019-05-31	21.3	74	1010.3	0.4	25.2	18.1	59	48	143	5	42	0.9
2019-06-01	20.8	75	1009.8	0.3	23.4	19.2	33	30	118	5	30	0.6
2019-06-02	22.4	68	1006.7	0.4	27.9	19.2	20	25	127	5	24	0.5
2019-06-03	23.5	71	1006.4	0.5	29.6	19.3	30	30	142	5	23	0.6
2019-06-04	25.4	70	1007.3	0.4	33.6	21.1	31	37	157	5	28	0.6
2019-06-05	25.4	78	1009.2	0.5	31.6	21.1	42	44	150	4	22	0.6
2019-06-06	27.1	79	1003.7	0.7	32.4	24.7	21	33	88	5	22	0.5
2019-06-07	23.9	65	1008.3	0.6	27.7	21.7	18	25	110	5	23	0.5
2019-06-08	24	72	1007.8	0.5	28.4	20.8	26	29	146	5	20	0.5
2019-06-09	24.7	76	1003.8	0.5	29.5	22.4	26	30	145	5	18	0.4
2019-06-10	24.4	82	1003.5	0.5	28.4	22.2	40	42	111	5	30	0.6
2019-06-11	23.8	70	1007.4	0.6	27.8	21.1	25	29	115	5	23	0.4
2019-06-12	23	69	1009.7	0.4	25.6	20.9	18	27	115	5	21	0.4
2019-06-13	21.7	80	1007.7	0.3	23.9	20.5	21	25	105	5	24	0.4
2019-06-14	21.6	73	1005.1	0.5	27.8	17	17	22	121	5	23	0.4
2019-06-15	25	63	1005.8	0.4	31.6	19.5	57	66	238	10	42	0.7
2019-06-16	27.2	62	1008	0.4	31.4	23.9	76	73	242	11	41	0.7
2019-06-17	27.4	52	1010.1	0.5	31.7	25.2	29	37	136	8	29	0.5
2019-06-18	22.7	93	1007.3	0.3	26	20.9	19	18	78	5	36	0.6
2019-06-19	23.5	91	1006	0.3	25.2	22.7	27	19	92	5	31	0.6
2019-06-20	23.1	90	1006.5	0.2	24.6	22.1	22	22	71	5	27	0.5
2019-06-21	23.1	92	1004.4	0.5	26.1	21.2	18	19	78	5	22	0.5
2019-06-22	23.6	77	1006.3	0.5	26.5	21.6	28	29	87	5	24	0.5
2019-06-23	23.7	70	1007.5	0.5	27.3	20.8	27	32	112	5	19	0.5
2019-06-24	24.1	71	1011	0.4	28.7	21.2	22	27	127	5	19	0.4
2019-06-25	23.2	79	1010.6	0.4	25.6	21.7	14	23	89	5	21	0.4
2019-06-26	22.4	93	1005.7	0.1	23.7	20.6	19	20	57	5	36	0.5
2019-06-27	25	88	1001.8	0.2	29.4	22.9	33	28	129	5	31	0.5
2019-06-28	28	77	1000.2	0.5	33.6	23.6	43	42	183	6	33	0.6
2019-06-29	28.4	87	997.3	0.2	31.5	25.8	40	38	79	6	44	0.9
2019-06-30	24.9	96	1001.7	0.2	26.3	23.2	21	14	95	4	37	0.7
2019-07-01	24.3	90	1005.2	0.2	25.7	22.6	17	15	95	4	31	0.5
2019-07-02	24.4	85	1008.1	0.3	26.7	22.4	18	23	117	5	31	0.5
2019-07-03	25.3	82	1006.9	0.5	28.2	24.1	23	29	125	5	23	0.4
2019-07-04	25	77	1006.9	0.3	27.7	22.6	36	37	124	5	28	0.5
2019-07-05	25.5	76	1002.4	0.4	29.6	23.4	37	36	113	6	29	0.5
2019-07-06	26.4	78	1000.1	0.4	31.6	22.8	36	31	128	5	23	0.4
2019-07-07	26.9	79	1000.7	0.3	30.8	23.5	34	38	200	5	31	0.6
2019-07-08	27	69	1004.3	0.4	30.6	24.3	54	49	173	7	32	0.7
2019-07-09	23.6	91	1002.9	0.4	25.8	22.4	15	16	73	5	23	0.4
2019-07-10	22.4	96	1002.8	0.3	24	21.2	16	19	73	5	34	0.5
2019-07-11	24.6	86	1007.8	0.2	28.9	22.1	32	34	97	5	46	0.6
2019-07-12	25.1	91	1006.5	0.2	26.5	23.9	28	25	64	5	35	0.5
2019-07-13	22.4	98	1001.1	0.2	24.4	21.4	8	11	97	4	28	0.4
2019-07-14	24.8	82	1003.3	0.3	29.9	21.6	31	29	151	6	34	0.5
2019-07-15	26.2	76	1005.4	0.3	30.7	22.3	22	27	116	5	25	0.4
2019-07-16	26	88	1007.2	0.3	28.2	25	17	23	75	5	24	0.4
2019-07-17	28.4	84	1005.8	0.5	33.1	25.5	20	28	76	5	21	0.4
2019-07-18	29.3	81	1002.9	0.5	32.9	27.4	10	21	35	4	20	0.3
2019-07-19	28.1	84	998.2	0.6	30.1	26.5	9	18	44	4	21	0.3
2019-07-20	28.3	80	1001.6	0.2	32.1	25.6	24	32	89	5	32	0.6
2019-07-21	30.3	75	1004	0.3	34.9	27	38	40	150	5	32	0.5
2019-07-22	30.6	78	1003.2	0.5	34.5	28.1	31	40	147	5	23	0.5
2019-07-23	31.7	71	1001.9	0.6	36.3	28.5	23	39	177	5	27	0.5
2019-07-24	31.4	76	1002.7	0.3	34.4	29.6	31	46	133	5	40	0.7
2019-07-25	31.8	74	1003.8	0.3	35.8	29.5	37	51	125	5	45	0.7
2019-07-26	32.5	73	1002.6	0.3	37	30	47	59	156	5	45	0.8
2019-07-27	31.7	74	1002.8	0.4	34.9	29.6	34	47	126	6	42	0.7
2019-07-28	31.5	72	1004.9	0.5	35	29.3	20	33	124	5	20	0.5
2019-07-29	32.2	68	1006.1	0.6	37.2	28.8	16	29	148	5	21	0.4
2019-07-30	32.7	65	1005.9	0.6	37.9	29.5	15	30	158	6	23	0.4
2019-07-31	31.7	66	1006.9	0.6	35	29.2	12	24	116	6	21	0.5
2019-08-01	31.4	69	1008	0.8	35.6	28.4	9	24	75	5	18	0.4
2019-08-02	30.8	70	1008.1	0.7	34.6	28.1	8	22	50	5	17	0.4
2019-08-03	29.3	79	1007.3	0.5	33.1	27.1	13	25	44	6	19	0.4
2019-08-04	26.9	91	1006.2	0.3	29.6	24.9	6	13	36	4	24	0.5
2019-08-05	28.9	82	1006.7	0.3	33	25.6	9	23	41	5	19	0.4
2019-08-06	30	74	1005.5	0.5	34.7	27.3	17	24	71	6	19	0.4
2019-08-07	30	73	1004	0.5	34.3	27.1	26	35	76	5	19	0.4
2019-08-08	30.5	79	1003.5	0.5	34.1	28.3	11	26	30	5	16	0.4
2019-08-09	29.3	83	1000.6	1	31.5	25.7	11	25	25	5	11	0.4
2019-08-10	27	97	989.5	1.2	28.6	25.9	12	20	78	4	6	0.5
2019-08-11	28.4	83	989.6	0.7	32.9	25.7	8	16	79	4	16	0.5
2019-08-12	30.1	63	998.1	0.3	34.8	26.4	20	35	147	5	27	0.6
2019-08-13	29.2	80	1000.5	0.2	32.7	26.8	32	40	141	6	44	0.7
2019-08-14	29.7	72	1000.5	0.2	34.5	26.3	46	53	207	6	45	0.9
2019-08-15	29	74	998.5	0.3	33.3	26.5	42	46	179	7	32	1.1
2019-08-16	29.4	72	999.6	0.3	34.3	24.6	46	55	235	7	31	1
2019-08-17	31.1	67	1002.3	0.2	36.7	27.1	53	67	246	7	33	0.9
2019-08-18	29.1	78	1005.2	0.3	33.2	23.2	41	47	151	5	33	0.7
2019-08-19	27.6	78	1007.6	0.3	31.3	23.8	17	27	138	5	26	0.6
2019-08-20	28	70	1007.9	0.4	31.1	25.6	15	25	120	6	24	0.6
2019-08-21	29	65	1006.3	0.4	33.3	25.7	25	41	171	7	34	0.7
2019-08-22	29.2	71	1008	0.4	32.7	26.4	36	49	151	6	30	0.7
2019-08-23	29.2	77	1009.6	0.3	31.4	27.7	32	41	116	6	28	0.6
2019-08-24	29.2	80	1009.9	0.4	31.7	27.8	21	28	71	6	26	0.5
2019-08-25	29.6	83	1009.2	0.4	34.1	27.9	11	23	46	5	18	0.4
2019-08-26	30.8	78	1006.8	0.4	35.1	28.2	17	32	137	5	23	0.5
2019-08-27	31.7	74	1006.5	0.3	37.1	29.5	28	44	142	6	40	0.6
2019-08-28	28.9	84	1007.6	0.3	32	27.3	17	20	91	5	31	0.6
2019-08-29	22.4	92	1009.2	0.3	27.7	20.2	23	24	84	5	44	0.7
2019-08-30	24	82	1011.1	0.2	30	20.3	54	51	172	7	49	0.9
2019-08-31	25.7	77	1013.2	0.2	29.4	23.2	42	38	142	6	32	0.7
2019-09-01	21.5	95	1015	0.2	26.4	19.1	13	14	105	5	29	0.5
2019-09-02	22.5	98	1014.3	0.2	23.7	21.6	8	10	74	5	33	0.5
2019-09-03	23.7	96	1012.4	0	25.7	22.3	16	21	36	5	54	0.6
2019-09-04	24.9	94	1010.6	0.1	26.1	24	32	28	42	6	50	0.8
2019-09-05	26.9	89	1008	0.2	31.8	24.9	12	17	27	6	33	0.5
2019-09-06	25.7	95	1002.5	0.3	26.7	24.2	8	14	24	5	23	0.5
2019-09-07	26.6	76	1002.3	0.2	31.3	24	21	36	134	7	35	0.7
2019-09-08	27.2	70	1006.1	0.3	30.8	24.3	33	41	151	6	33	0.7
2019-09-09	26.8	78	1005.9	0.2	30.7	24.6	24	33	88	6	37	0.6
2019-09-10	27.5	82	1009.7	0.3	33.6	24.8	36	54	183	7	47	0.8
2019-09-11	28	80	1013.8	0.3	31.4	25.7	32	34	117	6	27	0.6
2019-09-12	27.6	77	1013.3	0.4	31.2	25.4	18	27	115	6	30	0.6
2019-09-13	27.3	72	1010.7	0.4	31.9	24.2	15	25	104	6	24	0.5
2019-09-14	27.8	73	1011.4	0.4	31.2	25.2	15	29	91	6	25	0.5
2019-09-15	27	74	1011.1	0.4	28.8	25.3	12	22	104	6	21	0.7
2019-09-16	25.8	61	1011.7	0.5	29.5	23.3	15	33	131	7	24	0.6
2019-09-17	26.1	66	1013.3	0.5	30	23.6	22	40	120	6	23	0.7
2019-09-18	26	61	1017.2	0.6	29.6	23.5	14	37	126	6	21	0.6
2019-09-19	23.8	59	1017.9	0.7	27.1	21.2	11	33	95	6	20	0.6
2019-09-20	23.6	60	1014.1	0.4	27.6	21.1	13	32	129	6	23	0.6
2019-09-21	21.3	85	1011	0.6	23.6	19.9	10	18	100	5	17	0.5
2019-09-22	20.7	86	1010.2	1	22.6	19.5	11	22	89	6	21	0.6
2019-09-23	22.5	70	1017.4	0.3	27.3	18.7	21	44	102	7	39	0.7
2019-09-24	23.3	64	1019.8	0.2	28	19.2	38	63	170	10	63	0.9
2019-09-25	24	64	1019.6	0.3	28.9	20.2	46	54	155	8	53	0.8
2019-09-26	23.7	64	1020.5	0.2	27.9	20.6	23	32	128	7	36	0.6
2019-09-27	23.7	67	1020.6	0.3	27.1	21	25	36	115	7	41	0.6
2019-09-28	24.1	74	1018.3	0.2	28.1	21.1	36	44	102	7	37	0.6
2019-09-29	24.3	73	1016.9	0.3	27.8	21.4	30	37	107	6	33	0.5
2019-09-30	24.6	76	1015.3	0.3	27.9	22	30	40	92	6	29	0.5
2019-10-01	23.8	93	1010.8	0.7	25.5	22.1	12	14	31	6	17	0.4
2019-10-02	23.8	91	1006.4	0.6	27.1	21.8	11	18	46	6	21	0.5
2019-10-03	24.9	81	1012.2	0.2	29.4	21.5	19	29	72	8	37	0.7
2019-10-04	25.5	83	1012.6	0.2	30.1	23.1	36	32	113	8	28	0.6
2019-10-05	23.7	79	1017.4	0.5	26.3	21.3	27	35	107	6	21	0.6
2019-10-06	21.7	64	1021.1	0.5	24.2	20.2	10	30	98	6	23	0.4
2019-10-07	21.6	75	1019.1	0.1	23.6	20.4	35	52	60	8	42	0.7
2019-10-08	19	74	1021.5	0.4	21	17.8	60	56	59	9	51	1.1
2019-10-09	20.3	72	1019.7	0.2	23.4	17.4	41	47	87	8	47	0.7
2019-10-10	22.7	67	1014.4	0.3	27.3	19.3	15	36	122	9	36	0.5
2019-10-11	23.3	79	1013.2	0.1	25.6	22	38	48	72	10	45	0.7
2019-10-12	22.7	74	1014.7	0.2	25.1	20.8	29	44	124	8	28	0.6
2019-10-13	22.2	75	1018.6	0.2	25.5	20.1	20	36	111	7	30	0.5
2019-10-14	21.2	80	1024.5	0.3	25	19.2	17	34	90	7	27	0.5
2019-10-15	17.8	56	1029.1	0.6	19.8	16.4	9	28	77	6	23	0.4
2019-10-16	17.8	63	1025.7	0.2	21.3	14.2	17	36	87	7	39	0.5
2019-10-17	19.6	69	1022.8	0.3	21.7	18.2	21	38	95	8	41	0.6
2019-10-18	19.4	65	1021.3	0.3	22.1	17.4	18	32	106	7	37	0.5
2019-10-19	19.2	66	1022.4	0.3	23.2	15.9	35	45	129	8	48	0.6
2019-10-20	19.5	65	1021.3	0.3	23.1	16.4	44	48	144	8	54	0.7
2019-10-21	19.4	66	1018	0.3	22.6	16.6	35	38	121	7	46	0.6
2019-10-22	19.4	67	1016.1	0.2	22.5	16.5	31	42	115	8	59	0.6
2019-10-23	20.5	69	1015.9	0.3	23.4	18.5	36	45	123	7	44	0.6
2019-10-24	20.3	71	1018.4	0.2	23.6	17.8	27	38	113	7	44	0.6
2019-10-25	20.1	70	1020.4	0.3	23.3	17.2	48	64	140	9	50	0.7
2019-10-26	18.4	68	1022.4	0.5	20.5	17	20	34	75	7	30	0.5
2019-10-27	16.5	60	1020.7	0.2	18	15.2	22	42	65	8	54	0.6
2019-10-28	16.7	73	1017.5	0.1	20.1	14	61	64	88	9	76	0.9
2019-10-29	17.8	68	1019	0.2	21.6	14.6	71	205	112	12	71	1
2019-10-30	17.9	58	1022.4	0.1	22.2	14.4	46	212	104	10	79	0.8
2019-10-31	18.4	56	1022.1	0.1	23.3	14.7	52	207	158	10	70	0.7
2019-11-01	18.9	60	1022.1	0.2	24.1	15.1	42	111	136	9	69	0.7
2019-11-02	19.4	71	1019.6	0.2	23.2	16.2	72	147	171	9	60	0.9
2019-11-03	19.9	67	1019.1	0.3	22	18.6	28	47	106	8	36	0.6
2019-11-04	18.5	69	1022.3	0.3	21.4	16.6	32	50	112	8	33	0.8
2019-11-05	16.8	63	1021.4	0.3	19.6	14	16	30	100	7	36	0.5
2019-11-06	17	64	1017.9	0.2	20.7	14	15	27	90	7	46	0.5
2019-11-07	18.1	65	1018.8	0.2	19.7	17	33	42	114	7	41	0.7
2019-11-08	16.1	59	1023.5	0.4	18.3	14.2	13	29	89	7	29	0.5
2019-11-09	15.1	56	1023.7	0.2	18.7	12.2	12	26	92	7	43	0.5
2019-11-10	16.1	60	1016.6	0.2	21.1	12.4	41	65	131	9	57	0.7
2019-11-11	16.9	45	1016.5	0.1	21.5	13.1	44	103	78	12	78	0.9
2019-11-12	17.1	69	1019.3	0.2	19.7	14.4	26	76	72	7	59	0.6
2019-11-13	18.4	72	1020.3	0.2	20.2	16.8	55	76	93	10	56	0.9
2019-11-14	15	44	1025.6	0.4	17.9	12.2	20	86	77	7	39	0.6
2019-11-15	15.4	61	1019.6	0.3	19.8	12.3	21	61	108	8	49	0.6
2019-11-16	17.7	70	1016.2	0.3	22.5	14.4	23	51	109	9	48	0.5
2019-11-17	20	72	1014.5	0.2	24.2	16.6	35	63	81	9	51	0.7
2019-11-18	13.5	71	1024.5	0.6	21.1	10.2	47	122	63	7	37	0.7
2019-11-19	9.6	46	1029	0.5	12.9	6.1	33	136	68	9	36	0.6
2019-11-20	11.7	58	1029.6	0.3	15.3	8.5	23	80	76	8	50	0.6
2019-11-21	14.4	67	1026.5	0.2	17.5	11.3	14	35	64	7	55	0.5
2019-11-22	17.5	85	1022	0.1	21.4	14.3	25	50	52	9	63	0.6
2019-11-23	19	94	1019.3	0.1	20.9	17.3	22	38	40	7	58	0.5
2019-11-24	19.6	85	1019.9	0.3	22.7	14.3	36	38	61	6	43	0.7
2019-11-25	10.6	70	1031.4	0.8	14.3	7.8	13	31	59	6	28	0.4
2019-11-26	9.9	70	1030.1	0.3	12.6	8.1	16	28	47	6	42	0.5
2019-11-27	10.2	84	1028.6	0.4	11	9	18	20	51	6	39	0.5
2019-11-28	9.5	69	1031.9	0.7	11.1	8.4	16	32	57	6	30	0.5
2019-11-29	10	67	1031.6	0.3	12.1	8.1	17	32	47	6	43	0.5
2019-11-30	11.7	83	1026.8	0.1	13.5	9.8	15	24	38	6	58	0.5
2019-12-01	10.4	93	1022.3	0.3	12.3	7.5	28	23	41	5	43	0.9
2019-12-02	7.5	63	1028.5	0.4	10	5	68	62	55	12	62	1.1
2019-12-03	7	49	1029.8	0.1	10.3	4.3	88	87	61	15	95	1.1
2019-12-04	8	54	1031	0.2	12	4.8	106	101	44	15	115	1.3
2019-12-05	10	53	1033.2	0.2	12.8	7.5	55	55	74	11	63	0.7
2019-12-06	9	59	1035.2	0.6	10.8	7.2	14	23	76	6	32	0.4
2019-12-07	7.2	52	1032.7	0.3	9.9	4.9	38	47	84	9	64	0.6
2019-12-08	7.7	53	1030.2	0.1	11.6	4.6	74	77	75	13	97	1
2019-12-09	9.4	59	1024.5	0.1	15.1	6	87	81	69	11	101	0.9
2019-12-10	11.5	68	1020.2	0.1	16.7	8.1	73	76	75	12	113	0.9
2019-12-11	11.5	62	1021.3	0.3	14.4	8.9	114	115	88	14	95	1.3
2019-12-12	10	60	1028.2	0.3	13	8	33	44	73	8	59	0.7
2019-12-13	11.3	65	1025.9	0.2	15.8	8.2	33	57	73	9	74	0.8
2019-12-14	12	75	1026.7	0.3	15.1	9.5	57	69	76	9	66	0.9
2019-12-15	12.9	77	1024.9	0.3	16	10.6	17	31	61	7	43	0.5
2019-12-16	16	86	1018.6	0.2	19.9	13.8	34	49	61	7	58	0.7
2019-12-17	14.2	89	1018.5	0.3	16.4	10.3	77	62	16	8	60	1.2
2019-12-18	8.9	82	1026.6	0.6	10.4	7.4	29	31	54	5	34	0.6
2019-12-19	6.5	78	1028.6	0.5	8.2	4.7	28	31	40	6	45	0.6
2019-12-20	7.8	70	1029.4	0.4	9.9	5.7	41	41	52	8	52	0.7
2019-12-21	9.6	88	1024.5	0.4	10.2	9	28	24	62	6	52	0.6
2019-12-22	10.9	89	1019.3	0.2	12.7	9.9	18	21	62	6	46	0.6
2019-12-23	10.5	82	1022.1	0.5	13.3	8.4	33	30	69	6	52	0.7
2019-12-24	10.8	87	1024	0.8	11.9	10	34	36	64	6	43	0.7
2019-12-25	12.9	86	1019.6	0.4	15.2	11.2	27	30	34	6	66	0.7
2019-12-26	10.4	90	1020	0.6	14.3	6.9	33	26	41	6	45	1
2019-12-27	5.8	57	1028.3	0.4	8.3	3.6	72	70	49	10	68	1
2019-12-28	7.7	64	1026	0.3	12.2	4.2	73	66	78	10	66	0.9
2019-12-29	12.4	81	1020.9	0.3	15.1	10.6	42	46	33	8	66	0.7
2019-12-30	11.1	72	1025.5	0.5	13.5	8.5	77	61	86	10	49	0.8
2019-12-31	4.6	59	1036.9	1.1	9.4	1.1	17	31	56	6	28	0.4
2020-01-01	5.4	59	1033.1	0.4	9.5	2.6	14	24	60	6	43	0.4
2020-01-02	9.7	81	1028.4	0.1	12.5	6.8	24	40	34	7	65	0.6
2020-01-03	10.7	93	1026.8	0.2	11.2	10.3	39	41	30	8	58	0.7
2020-01-04	9.9	89	1026.3	0.5	10.8	9.1	65	50	61	7	52	0.8
2020-01-05	11.6	77	1026.3	0.4	13.6	10	40	38	63	7	49	0.6
2020-01-06	16.1	84	1020	0.3	21.6	12.7	22	32	69	7	46	0.6
2020-01-07	13.9	91	1014.2	0.4	18.5	7.9	33	31	27	6	52	1.2
2020-01-08	6.5	66	1026	0.6	7.9	5.5	42	40	42	6	44	1.1
2020-01-09	6.2	75	1026.2	0.5	7.4	5.5	33	31	47	6	46	0.8
2020-01-10	8.3	89	1022.1	0.8	9.1	6.8	16	19	53	4	35	0.6
2020-01-11	7.3	94	1021.1	0.6	8.2	6.2	31	22	55	6	39	0.7
2020-01-12	5.9	69	1023.7	0.6	7.4	4	112	81	59	11	56	1.4
2020-01-13	5.9	71	1024.3	0.2	9	3.5	118	85	64	10	67	1.3
2020-01-14	6.4	66	1026.3	0.4	7.7	4.9	119	87	64	9	63	1.3
2020-01-15	5.8	74	1027.5	0.5	8.8	3.5	37	27	66	5	48	0.6
2020-01-16	6.6	93	1024.7	0.8	7.2	6	10	10	64	5	35	0.5
2020-01-17	6	82	1026.4	0.6	6.7	5.2	42	36	56	6	41	0.7
2020-01-18	4.9	64	1026.1	0.5	5.7	4.3	68	53	55	7	43	0.9
2020-01-19	6	60	1024.5	0.2	8.8	4.7	85	65	67	7	59	1
2020-01-20	6.6	67	1025.6	0.2	10.7	3.8	131	106	103	10	76	1.4
2020-01-21	8.2	79	1026.6	0.3	12.6	4.9	97	66	113	6	57	1
2020-01-22	9.8	97	1020.4	0.1	10.3	9.3	78	44	68	5	55	1.2
2020-01-23	9.4	97	1022.8	0.4	10.7	8.3	33	21	66	4	35	0.7
2020-01-24	8.8	88	1027.7	0.6	10.2	7.7	44	52	97	5	25	0.7
2020-01-25	7.8	95	1027	0.4	8.4	7.3	14	14	69	4	21	0.5
2020-01-26	8.5	96	1021.9	0.8	9.3	7.5	16	20	77	5	18	0.5
2020-01-27	6.6	93	1019.2	0.7	8	5.8	24	22	79	4	19	0.6
2020-01-28	5.5	76	1022.1	0.5	7.4	3.4	83	66	62	6	25	1.1
2020-01-29	6.5	62	1023	0.4	9.8	4.8	68	56	102	8	22	0.9
2020-01-30	5.1	56	1022.6	0.6	7.3	2.8	71	59	98	9	22	1.1
2020-01-31	4.9	50	1025.4	0.3	9.2	2	49	41	89	9	34	0.9
2020-02-01	6.1	54	1027.1	0.3	11.9	1.9	30	26	81	7	45	0.7
2020-02-02	8	65	1026.2	0.3	12.9	4.3	36	24	101	6	31	0.6
2020-02-03	8.9	71	1027.2	0.4	11.4	6.8	61	44	103	6	39	0.8
2020-02-04	8.3	61	1026.5	0.5	12.6	5.5	19	21	91	5	29	0.5
2020-02-05	7.4	73	1029.3	0.7	11.3	5	27	31	89	5	29	0.6
2020-02-06	5.8	72	1030.8	0.7	7.5	4.7	17	21	79	4	15	0.5
2020-02-07	6.5	85	1029	0.6	8.3	4.9	24	24	81	5	17	0.6
2020-02-08	7.4	69	1031.1	0.3	9.1	6.3	41	37	79	5	21	0.6
2020-02-09	7	72	1030.6	0.3	10.8	3.5	78	65	97	6	31	0.9
2020-02-10	9.1	63	1025.8	0.2	16.1	4.6	48	42	104	8	33	0.7
2020-02-11	10.3	86	1022.6	0.4	12	8.5	26	21	89	5	24	0.5
2020-02-12	12.5	87	1018.2	0.1	16.1	10.7	49	36	64	6	43	0.9
2020-02-13	12.4	92	1017.7	0.4	15.6	9.9	53	32	69	5	29	0.8
2020-02-14	13.8	96	1015.8	0.4	17.5	12	18	10	66	4	31	0.6
2020-02-15	11.2	96	1018.9	0.4	14.8	3.8	13	7	48	4	24	0.6
2020-02-16	2.8	62	1026.8	1	5.9	0.3	25	36	79	6	15	0.6
2020-02-17	4.6	40	1029.8	0.7	9.3	0.7	17	27	84	7	18	0.5
2020-02-18	5.7	41	1031.7	0.4	9.8	2.2	18	23	84	8	27	0.6
2020-02-19	7.1	61	1028.3	0.4	12.2	3.3	14	20	106	5	23	0.3
2020-02-20	10.1	70	1030.1	0.4	15.7	5.9	16	22	90	5	38	0.4
2020-02-21	11.3	76	1029.2	0.4	16.9	7.6	29	31	91	6	33	0.5
2020-02-22	11.8	61	1031.2	0.4	16.9	7.9	69	96	115	9	33	0.7
2020-02-23	10.2	53	1030.2	0.5	14.9	6.6	27	53	108	5	24	0.4
2020-02-24	14.4	65	1020.4	0.7	20.8	10.2	38	69	129	8	26	0.6
2020-02-25	17.8	77	1015.4	0.4	24.5	13.9	47	52	86	7	35	0.8
2020-02-26	10.8	79	1024	0.7	13.9	9.6	28	35	87	4	19	0.6
2020-02-27	10.1	67	1028.1	0.8	13.4	7.8	29	44	94	5	21	0.6
2020-02-28	10.8	80	1019.1	0.5	13.2	9	36	42	76	5	37	0.8
2020-02-29	10.1	89	1017.2	0.2	11.3	9.1	26	16	63	5	37	0.8
2020-03-01	10.2	90	1019.1	0.4	11.2	9.7	16	13	79	4	23	0.6
2020-03-02	9.1	68	1025.9	0.7	10.7	7.2	24	28	96	5	18	0.8
2020-03-03	9.5	62	1024.4	0.5	12.4	8	22	33	82	5	29	0.6
2020-03-04	9.6	59	1026.5	0.5	12.2	7.8	29	35	94	5	22	0.6
2020-03-05	8.2	48	1028.3	0.7	12.2	5.6	22	30	99	5	20	0.5
2020-03-06	9.3	64	1020.5	0.6	14.3	5.4	21	31	113	5	22	0.5
2020-03-07	12.5	82	1015.4	0.3	15.9	10.5	60	44	106	6	37	0.7
2020-03-08	11.9	77	1016.3	0.6	16.8	8.7	18	19	106	4	23	0.4
2020-03-09	13.1	95	1008	0.4	14.1	11.9	12	8	82	4	34	0.6
2020-03-10	10.8	77	1016.3	0.7	13.3	9	30	30	96	5	29	0.7
2020-03-11	11.3	61	1021.7	0.3	16.1	7.1	63	63	112	6	50	0.8
2020-03-12	12.5	73	1019.6	0.5	16.4	9.9	50	48	110	6	30	0.7
2020-03-13	12	93	1020.3	0.3	13	10.9	23	25	84	4	32	0.6
2020-03-14	10.6	60	1022.9	0.6	14.8	7.4	25	46	88	6	32	0.6
2020-03-15	13.4	51	1019.5	0.3	20	8.1	44	73	109	8	58	0.7
2020-03-16	13.2	44	1023.6	0.8	17.6	9.5	15	37	88	6	25	0.5
2020-03-17	16	48	1019.2	0.4	23.5	11.2	31	58	131	10	49	0.6
2020-03-18	18	58	1014.8	0.3	24.6	12.6	51	75	164	13	57	0.7
2020-03-19	16	54	1014.2	0.7	20.3	13	34	76	90	9	38	0.5
2020-03-20	14	42	1017.2	0.7	19.3	9.8	15	61	116	11	34	0.4
2020-03-21	18.3	60	1011.9	0.5	25.7	12.4	35	64	134	13	44	0.7
2020-03-22	17.1	81	1013.5	0.6	19.2	13.9	38	36	103	6	28	0.6
2020-03-23	14.2	47	1020.5	0.7	18.6	10.6	14	29	94	6	33	0.4
2020-03-24	15	54	1019.9	0.5	20.6	10.7	24	37	104	6	39	0.4
2020-03-25	17.3	58	1014.9	0.8	22.4	14.3	16	39	119	8	27	0.5
2020-03-26	19.6	94	1010.7	0.3	23.2	17.4	35	42	50	9	55	0.8
2020-03-27	13.6	78	1018.1	0.9	20.6	10	13	32	86	5	19	0.5
2020-03-28	7.5	81	1023.9	0.6	10	5.4	8	25	77	5	18	0.4
2020-03-29	8.3	72	1021.9	0.4	10.2	7.3	8	28	73	6	24	0.4
2020-03-30	10.3	93	1018.9	0.4	12.4	7.9	13	23	79	5	32	0.5
2020-03-31	12	85	1017.7	0.5	16.5	10.1	16	27	91	5	34	0.5
2020-04-01	12.8	71	1020.2	0.5	17.1	9.9	36	41	125	7	29	0.6
2020-04-02	12.7	58	1023.4	0.7	17.4	9.6	17	45	109	6	29	0.4
2020-04-03	13.9	53	1023	0.6	17.5	11.7	27	47	113	7	37	0.5
2020-04-04	14.8	51	1023.5	0.4	20.2	11.3	47	72	153	9	52	0.6
2020-04-05	11.9	55	1026.2	0.6	16.8	8	13	40	114	6	18	0.4
2020-04-06	12	61	1022.8	0.5	16	9.1	15	38	92	6	32	0.4
2020-04-07	14.2	54	1019.6	0.4	21.8	8.7	25	46	93	7	60	0.5
2020-04-08	16.4	39	1019	0.3	22.9	10.4	29	52	127	8	64	0.6
2020-04-09	16.7	62	1020.5	0.6	21.6	12.8	34	54	117	7	41	0.5
2020-04-10	15.9	77	1021.9	0.6	20.7	13.6	23	46	114	6	26	0.5
2020-04-11	12.8	87	1019.4	0.7	15.8	9.5	22	29	96	5	25	0.5
2020-04-12	12.6	64	1017.4	0.4	19.3	8.3	52	54	127	8	34	0.8
2020-04-13	13.6	56	1018.4	0.4	19.7	8.9	56	82	141	10	55	0.9
2020-04-14	15.1	53	1018	0.3	19.5	11.1	61	76	173	9	54	0.7
2020-04-15	18.5	49	1013.2	0.3	24.6	14.7	54	72	140	9	60	0.7
2020-04-16	19.9	55	1012.1	0.5	26.2	15.3	36	58	164	9	41	0.6
2020-04-17	19.8	63	1012	0.2	21.6	18.7	53	104	88	10	81	1
2020-04-18	16.7	60	1017.6	0.4	18.9	15.1	43	72	129	7	44	0.8
2020-04-19	14.7	89	1011.4	0.4	16.1	13.5	32	28	111	5	30	0.8
2020-04-20	17	70	1015.6	0.3	22.7	12.8	54	46	159	7	45	0.9
2020-04-21	13.6	72	1019.7	0.3	18.3	11.4	21	29	90	6	32	0.5
2020-04-22	15.5	51	1021.5	0.3	19.9	12.5	24	48	115	7	38	0.5
2020-04-23	16.1	49	1022.5	0.4	19.8	13.4	22	50	118	7	29	0.5
2020-04-24	17.4	38	1020.2	0.3	23.1	12.9	38	71	158	10	49	0.6
2020-04-25	20.2	41	1015.8	0.3	26.7	14.7	41	71	154	9	47	0.6
2020-04-26	18.3	58	1016.9	0.6	23	15.3	32	70	118	7	27	0.5
2020-04-27	16.4	56	1021.1	0.6	20.1	14.2	18	37	105	6	31	0.4
2020-04-28	16.3	49	1023	0.4	23.2	11.7	20	36	110	6	40	0.4
2020-04-29	19.3	61	1017.1	0.7	26.2	14.6	20	45	151	8	29	0.5
2020-04-30	23.5	68	1013.4	0.6	32.3	17.8	35	66	192	10	40	0.7
2020-05-01	22.4	81	1011.6	0.2	24.7	20.8	39	61	63	9	47	0.7
2020-05-02	23.8	80	1006.4	0.4	29.4	20.2	30	38	145	7	26	0.6
2020-05-03	26.5	68	1003.4	0.2	34	21.5	54	74	195	8	49	0.8
2020-05-04	24.6	74	1008	0.4	27.7	19.7	58	43	130	7	47	0.7
2020-05-05	19.4	91	1007.8	0.4	20.7	18.5	27	23	107	5	26	0.7
2020-05-06	18.6	87	1011.1	0.4	21.1	16.6	23	27	73	6	30	0.7
2020-05-07	20.8	78	1011.6	0.5	25.2	18.2	25	36	111	6	22	0.6
2020-05-08	22.3	87	1006.3	0.7	25	20.3	17	28	75	6	19	0.6
2020-05-09	22.2	84	1006.5	0.2	23.6	20.5	44	41	80	6	41	1
2020-05-10	19.7	80	1011.4	0.2	22.6	17.1	77	65	89	7	48	1
2020-05-11	21.8	74	1011.9	0.1	27.1	17.9	82	67	192	7	42	0.9
2020-05-12	23.7	40	1011.3	0.4	30.3	17.7	24	65	160	9	38	0.6
2020-05-13	22.7	40	1015.9	0.5	29.4	18.6	18	80	122	7	32	0.5
2020-05-14	21.9	68	1011.2	0.8	25.4	19.5	19	80	137	7	22	0.6
2020-05-15	24	85	1005.5	0.2	28.2	21.1	33	42	108	7	43	0.8
2020-05-16	23.5	94	1006.5	0.2	25.7	22.5	67	43	83	7	62	0.9
2020-05-17	25.2	85	1003.7	0.3	29.6	22.2	69	48	153	9	38	0.9
2020-05-18	25.6	66	1000.6	0.4	30.1	22.9	36	67	158	9	36	0.8
2020-05-19	23.4	37	1007	0.4	29.6	18	28	73	150	9	39	0.7
2020-05-20	24.3	51	1009.6	0.4	30.5	19.9	40	70	197	9	35	0.6
2020-05-21	23.1	65	1010.5	0.6	26.8	21.4	21	50	145	7	22	0.6
2020-05-22	22.2	64	1009.1	0.5	26	19.5	20	37	133	7	23	0.6
2020-05-23	23	75	1008.9	0.5	27.1	19.8	22	36	108	8	22	0.6
2020-05-24	25.2	74	1009.3	0.5	32.3	21.6	39	54	166	8	24	0.7
2020-05-25	23.9	72	1011.9	0.3	27.2	21.9	53	52	126	7	30	0.8
2020-05-26	19.4	89	1010.2	0.3	22.6	16.7	17	20	92	6	32	0.6
2020-05-27	22.1	71	1010.9	0.3	26.8	19	39	47	128	7	53	0.8
2020-05-28	25.4	68	1010.5	0.2	31.5	21.4	63	73	220	9	47	0.9
2020-05-29	23.9	71	1012.6	0.2	25.9	22	64	58	102	8	49	0.8
2020-05-30	18	95	1011.8	0.3	22	15.4	11	15	110	6	24	0.5
2020-05-31	22.7	84	1010.5	0.1	28	19.2	57	55	172	7	44	1
2020-06-01	25.9	71	1010.7	0.4	30.9	22.6	61	58	191	7	36	0.8
2020-06-02	26.7	67	1006.5	0.4	33.1	21.8	28	44	189	8	32	0.7
2020-06-03	26.3	84	1003.3	0.2	28.8	23.2	26	30	74	6	46	0.8
2020-06-04	25.7	82	1004.1	0.2	30.5	22.5	42	48	141	6	51	0.9
2020-06-05	23.4	94	1005.1	0.2	27.1	21	22	17	82	5	32	0.6
2020-06-06	23.5	86	1006.5	0.5	28.1	20.2	11	16	92	5	21	0.6
2020-06-07	24.1	74	1009.9	0.4	29.1	20.5	21	35	120	6	22	0.5
2020-06-08	24.5	80	1010.2	0.5	28.8	21.9	31	54	95	6	20	0.6
2020-06-09	25.4	89	1008.5	0.3	28.9	23.3	12	15	60	5	21	0.5
2020-06-10	25.9	91	1005.3	0.1	27.8	24.1	36	33	56	5	44	0.7
2020-06-11	26.6	91	1004.3	0.3	29.5	25.2	52	33	77	5	36	0.7
2020-06-12	28.7	83	1002.8	0.4	34.6	25.1	47	42	180	5	34	0.7
2020-06-13	29	84	1003.4	0.2	33.8	25.3	39	52	189	6	44	0.7
2020-06-14	29.4	79	1007.2	0.2	31.7	27.3	32	40	109	6	40	0.8
2020-06-15	25.9	98	1008	0.2	28.3	23.8	42	100	68	5	41	0.8
2020-06-16	24.5	92	1006.4	0.3	25.5	23.5	23	22	126	5	32	0.6
2020-06-17	26.4	86	1002.5	0.3	31.7	21.8	40	46	119	5	33	0.7
2020-06-18	28	79	1000.4	0.3	32.8	22.4	26	33	82	5	37	0.8
2020-06-19	24.3	78	1007.3	0.3	28.2	21.9	24	29	141	5	23	0.7
2020-06-20	23.4	80	1008.7	0.4	25.1	21.7	39	32	124	5	24	0.7
2020-06-21	21.6	96	1005.6	0.2	23.9	20.5	12	11	87	4	22	0.5
2020-06-22	23.1	92	1005.2	0.3	25.6	20.4	14	19	87	5	23	0.6
2020-06-23	25.5	92	1003.6	0.4	27.9	23.9	18	21	102	5	26	0.6
2020-06-24	25.6	93	1002.5	0.1	27.3	24.2	30	31	88	5	44	0.9
2020-06-25	24.2	97	1003.9	0.1	26.4	22.9	38	29	85	5	39	0.9
2020-06-26	26.6	88	1005.5	0.3	31.1	23.3	32	28	132	5	26	0.7
2020-06-27	26.5	94	1003.5	0.1	27.9	25.3	25	23	65	6	36	0.7
2020-06-28	25.9	96	1004.6	0.2	26.8	24.9	18	15	72	5	38	0.6
2020-06-29	26.2	95	999	0.3	28.2	25	26	28	74	6	29	0.7
2020-06-30	26.2	68	1001.8	0.4	32	22.3	22	30	174	8	31	0.6
2020-07-01	26.1	70	1005.6	0.4	30.6	23.5	17	23	130	6	23	0.5
2020-07-02	25.3	80	1007.1	0.4	27.5	24.1	13	20	94	5	19	0.5
2020-07-03	26.4	89	1004.4	0.3	29.8	22.9	14	20	92	5	24	0.6
2020-07-04	25.2	79	1007.5	0.4	27.8	23.8	11	16	86	5	22	0.5
2020-07-05	24.2	96	1003.1	0.2	25.8	22.9	24	21	72	4	35	0.7
2020-07-06	25.3	100	1000.5	0.1	26.1	22.8	25	21	47	5	42	0.7
2020-07-07	27.5	90	1003.3	0.1	31.9	25.1	27	30	149	5	31	0.7
2020-07-08	27.3	88	1003.6	0.3	29	25.9	25	25	69	5	41	0.6
2020-07-09	25.9	96	999.4	0.1	26.9	25	18	15	51	4	35	0.5
2020-07-10	25.2	92	1001.8	0.2	27.1	24.1	20	20	70	4	26	0.5
2020-07-11	25.2	99	1005.1	0.1	27.1	23.5	27	22	56	4	34	0.5
2020-07-12	30	82	1003.2	0.4	36.7	25.3	39	51	169	6	31	0.6
2020-07-13	28.6	82	1004	0.1	32	25.5	27	34	62	5	39	0.8
2020-07-14	25	84	1007.2	0.2	26.4	23.5	37	31	82	4	38	0.8
2020-07-15	21.8	96	1006.5	0.2	24.6	20.3	15	12	83	4	30	0.5
2020-07-16	21.8	93	1006	0.2	24.4	20.2	16	19	87	3	27	0.5
2020-07-17	22.3	94	1006.5	0.2	23.8	20.9	18	22	55	4	34	0.5
2020-07-18	27	92	1003.2	0.2	32	23.7	44	55	139	5	43	0.7
2020-07-19	29.9	80	1001.1	0.4	34.9	26.9	31	44	133	6	33	0.7
2020-07-20	26	87	1007.4	0.2	28.9	25	28	26	53	6	40	0.9
2020-07-21	28.2	84	1009.7	0.2	33.6	24.9	61	58	171	6	42	0.8
2020-07-22	30.7	77	1007.8	0.4	35.8	27	57	53	182	7	46	0.7
2020-07-23	31.3	70	1004.1	0.4	36.8	28.7	23	44	148	6	33	0.6
2020-07-24	27.6	69	1006.7	0.3	30.3	25.9	31	43	113	6	34	0.7
2020-07-25	27.7	72	1006.4	0.3	33.4	23.7	59	61	219	7	34	0.8
2020-07-26	27.8	74	1005.5	0.4	31.3	25.2	38	44	181	6	32	0.5
2020-07-27	29.1	79	1004.1	0.4	32.7	26.9	34	45	107	6	36	0.6
2020-07-28	29	84	1006.8	0.2	33.1	26.5	37	48	119	6	41	0.6
2020-07-29	29.8	81	1008.5	0.4	33.3	27.4	14	27	112	6	25	0.4
2020-07-30	30.6	76	1010.8	0.7	34.7	28	10	24	75	5	18	0.4
2020-07-31	30	80	1010.6	0.5	32.5	28.5	11	29	54	5	18	0.4
2020-08-01	31.3	74	1008.8	0.5	35.8	28.2	11	29	111	6	17	0.4
2020-08-02	31.7	68	1007.3	0.5	36.1	28.5	13	32	111	6	18	0.4
2020-08-03	31.2	70	1006.8	0.6	35.1	28.5	9	27	56	5	16	0.4
2020-08-04	29.3	80	1003.9	0.6	31.3	26.8	9	28	52	5	13	0.4
2020-08-05	26.8	95	1005.1	0.5	29.8	25	10	21	61	5	20	0.5
2020-08-06	30.6	77	1007.7	0.2	35.4	27.4	20	37	128	6	29	0.5
2020-08-07	32	74	1005	0.2	36.8	29	30	51	151	6	34	0.6
2020-08-08	31.4	68	1002.3	0.2	33.8	28.8	21	40	131	7	28	0.5
2020-08-09	31.7	75	1000.4	0.4	36.9	28.9	26	41	153	7	22	0.5
2020-08-10	30.5	80	1001.2	0.3	36.4	25.9	22	40	120	6	31	0.6
2020-08-11	29.4	81	1005.8	0.4	35.2	24.8	17	35	121	6	26	0.5
2020-08-12	32	67	1009	0.4	36.7	28.8	16	35	129	7	25	0.5
2020-08-13	33	65	1008.5	0.4	38.6	29.3	21	41	162	7	27	0.6
2020-08-14	33.6	63	1007	0.4	38.3	30.2	26	49	174	8	30	0.6
2020-08-15	32.2	66	1007	0.8	36.8	28.8	13	29	125	7	22	0.5
2020-08-16	32	66	1007.9	0.6	37.6	28.3	18	37	153	7	20	0.5
2020-08-17	31.4	69	1010.1	0.7	35.9	28.4	25	46	104	7	19	0.4
2020-08-18	30.8	73	1010.6	0.8	35.4	28	28	46	98	8	18	0.4
2020-08-19	31.2	72	1009.4	0.8	36	27.8	25	42	108	7	20	0.4
2020-08-20	31.5	69	1009.9	0.6	37.1	28	23	38	109	6	22	0.5
2020-08-21	30.4	73	1011.2	0.3	35.2	27.5	22	36	78	5	19	0.5
2020-08-22	29.8	76	1010.1	0.2	34.5	27.4	21	34	57	4	21	0.5
2020-08-23	30.3	71	1006.6	0.2	35	27.1	22	34	64	5	24	0.4
2020-08-24	31	68	1003	0.2	36.2	27.6	15	25	64	4	22	0.4
2020-08-25	31.8	67	1000	0.3	36.9	28.6	12	30	80	5	20	0.5
2020-08-26	28.9	87	996.3	0.2	33.4	26.2	19	34	64	5	28	0.7
2020-08-27	29.4	76	999.8	0.1	33.9	26.4	34	48	156	5	30	0.8
2020-08-28	27.4	92	1002.8	0.2	31.9	25.1	15	19	79	4	30	0.6
2020-08-29	26.2	100	1005.1	0	27	25.5	23	25	64	4	34	0.6
2020-08-30	28.8	83	1008	0.2	34.1	25.6	30	29	72	4	25	0.6
2020-08-31	30	78	1008.7	0.3	34.5	27.5	14	22	54	6	17	0.4
2020-09-01	29.7	76	1005.3	0.6	33.5	27.8	14	26	66	4	16	0.4
2020-09-02	28.4	80	1002.5	0.4	31.9	26.9	18	32	67	5	23	0.6
2020-09-03	27.4	61	1008	0.2	31.9	23.8	41	65	194	8	39	0.9
2020-09-04	28.1	58	1011.4	0.2	32.2	24.8	41	60	194	8	38	0.7
2020-09-05	27.6	55	1010.4	0.3	32.7	24.1	20	38	146	6	29	0.6
2020-09-06	26.9	60	1007.1	0.4	31.6	23.6	21	43	135	6	27	0.6
2020-09-07	28.9	56	1004.6	0.1	33.6	25	54	98	244	12	48	1.1
2020-09-08	29.7	56	1010.1	0.3	35.5	26.2	44	76	210	8	50	0.8
2020-09-09	27.6	71	1010.1	0.2	33.6	24.5	26	46	176	7	38	0.7
2020-09-10	27.4	78	1007.5	0.1	31.5	25.2	26	36	128	5	29	0.6
2020-09-11	23.5	94	1008.5	0.1	26.1	21.6	21	27	90	5	39	0.7
2020-09-12	24.3	82	1012.9	0.1	27.7	22.2	23	34	98	6	36	0.8
2020-09-13	25.4	75	1015.2	0.1	29.1	22.7	19	29	115	5	37	0.7
2020-09-14	23.5	92	1014.2	0	27.1	21.9	18	20	88	5	41	0.7
2020-09-15	22.5	98	1011.4	0	23.1	22	23	18	53	6	51	0.8
2020-09-16	24.4	91	1009.5	0	28.1	22.3	46	41	93	6	54	1.2
2020-09-17	22.2	98	1010.4	0.2	25.6	18.2	26	19	100	5	33	0.8
2020-09-18	18.5	94	1017.1	0.1	19.8	17	28	29	72	5	53	0.9
2020-09-19	20.3	93	1017.7	0	23.1	18.4	71	60	65	7	72	1.2
2020-09-20	22.5	74	1017.1	0.1	27.7	19.3	28	38	118	6	53	0.8
2020-09-21	23.8	66	1016.1	0.1	26.9	21.4	19	33	93	6	49	0.7
2020-09-22	23.4	63	1014.7	0.1	25.5	21.7	15	30	113	6	44	0.7
2020-09-23	21.3	84	1014	0.1	23.3	19.2	16	28	62	6	54	0.7
2020-09-24	22.4	76	1013.5	0.1	26.5	19.4	21	35	91	6	48	0.8
2020-09-25	22.9	71	1013.3	0.1	26.8	19.8	16	32	93	6	42	0.7
2020-09-26	23.3	69	1014.4	0.2	26.5	21.2	13	29	89	5	36	0.6
2020-09-27	23.7	71	1015.6	0.2	27	20.9	10	26	92	5	29	0.5
2020-09-28	23.8	69	1014.8	0.1	27.2	21.5	10	28	92	6	31	0.5
2020-09-29	23.6	63	1011.7	0.2	26.8	21.4	10	27	88	6	34	0.5
2020-09-30	23.6	61	1011.7	0.2	26.6	21.3	17	35	103	6	35	0.5
2020-10-01	23.3	68	1013.1	0.2	27.2	20.3	26	42	139	6	30	0.7
2020-10-02	24.3	72	1013.2	0.2	28.1	21.6	21	34	143	6	21	0.6
2020-10-03	23.7	80	1013.6	0.1	25.1	22.9	12	24	73	6	29	0.5
2020-10-04	21.7	90	1012.4	0.3	23.8	20.3	10	19	92	6	19	0.6
2020-10-05	19.1	65	1019.6	0.3	22.4	15.9	12	33	79	6	24	0.6
2020-10-06	20	59	1021.7	0.3	23.2	17.1	11	27	85	7	24	0.7
2020-10-07	20.8	59	1022.2	0.2	22.7	19.7	10	27	91	6	22	0.5
2020-10-08	20.9	61	1022.1	0.2	24.4	17.8	12	31	103	6	27	0.5
2020-10-09	21.3	62	1020.8	0.2	24.6	18.5	12	32	101	6	36	0.5
2020-10-10	20.9	66	1018.5	0.2	24.5	18	15	35	107	6	36	0.5
2020-10-11	21.3	66	1015.7	0.1	25.1	18.3	18	36	110	7	39	0.6
2020-10-12	21.4	65	1016.8	0.2	25.4	18.5	19	35	110	6	33	0.6
2020-10-13	21.3	64	1020.4	0.3	23.9	19.6	23	38	102	6	31	0.6
2020-10-14	20.7	59	1022.7	0.3	23.2	18.5	11	36	111	6	28	0.5
2020-10-15	20.3	62	1023.9	0.3	21.4	19	12	33	91	6	24	0.5
2020-10-16	16.6	87	1022.9	0.1	19.4	15.1	14	21	63	6	42	0.6
2020-10-17	17.8	71	1023.6	0.2	21.9	14.7	26	34	103	7	39	0.7
2020-10-18	19.1	57	1023.4	0.1	21.8	16.6	21	31	107	7	35	0.6
2020-10-19	18.9	58	1023.8	0.1	21	17	14	26	99	6	34	0.5
2020-10-20	18.8	64	1023.8	0.2	22.7	15.4	20	40	128	6	52	0.6
2020-10-21	18.4	79	1018.9	0	19.1	17.2	45	54	55	7	83	0.9
2020-10-22	17.9	74	1017	0.1	21.1	16.1	70	80	106	11	59	1.1
2020-10-23	16.6	54	1020.2	0.2	19.8	13.5	25	111	97	9	41	0.6
2020-10-24	15.6	52	1023	0.2	18.9	12.2	19	42	88	8	41	0.6
2020-10-25	16.3	63	1021.7	0.2	20.5	13	16	37	95	6	46	0.5
2020-10-26	18.1	76	1019	0.1	22.4	15.3	16	32	87	6	45	0.5
2020-10-27	18.8	76	1019.7	0.1	21.7	16.8	20	26	95	6	40	0.6
2020-10-28	19.1	73	1022.7	0.1	20.7	17.9	24	41	87	6	41	0.6
2020-10-29	19	65	1024.3	0.2	20.9	17.5	15	36	81	6	30	0.5
2020-10-30	17.4	61	1025.5	0.2	20.5	14.7	15	35	89	6	38	0.5
2020-10-31	17.7	62	1023.5	0.1	21.5	14.4	18	42	90	7	53	0.6
2020-11-01	19	77	1019.9	0	22	16.4	36	54	85	7	58	0.7
2020-11-02	18.4	76	1021.1	0.1	21.4	16.2	55	85	119	7	41	0.8
2020-11-03	16.1	59	1024.6	0.3	18.2	13.9	26	67	84	7	31	0.6
2020-11-04	14.9	50	1025.8	0.1	17.8	12.8	12	35	75	6	34	0.5
2020-11-05	16.5	66	1023.6	0.2	20.2	13.4	10	31	75	5	37	0.4
2020-11-06	19.1	75	1020.7	0	23.9	15.7	31	54	93	8	66	0.7
2020-11-07	19.5	62	1020.8	0	23.2	16.9	87	106	129	13	97	1.3
2020-11-08	18	50	1025	0.2	20.6	15.4	61	120	105	9	41	0.7
2020-11-09	15.8	52	1026.9	0.2	18.3	13.4	17	68	87	7	33	0.5
2020-11-10	15.5	54	1028	0.1	18.7	12.8	18	46	95	7	55	0.6
2020-11-11	15.3	59	1030	0.1	18.9	12.4	17	36	92	6	55	0.6
2020-11-12	16.1	64	1028.3	0.1	20.5	12.7	15	31	96	6	51	0.5
2020-11-13	16.6	67	1027.3	0.3	19.9	14.3	17	27	98	6	48	0.5
2020-11-14	16.7	73	1027	0.1	20	13.5	27	47	115	6	52	0.6
2020-11-15	17.7	81	1024.9	0.1	21.5	15.2	31	46	93	6	58	0.6
2020-11-16	18.6	88	1023	0.1	21.3	16.4	21	37	74	6	44	0.5
2020-11-17	20.8	87	1018.9	0.2	23.6	18.7	13	29	67	6	28	0.5
2020-11-18	22.8	83	1012	0.2	27.2	20.2	13	37	77	8	24	0.5
2020-11-19	20.7	77	1010.9	0.1	23.1	17.8	40	51	60	9	48	1.2
2020-11-20	15.5	78	1019.3	0.3	18.7	14.2	34	34	67	6	30	0.8
2020-11-21	15.8	71	1020.2	0.2	17.5	14.1	12	33	61	5	30	0.5
2020-11-22	14.5	93	1022.8	0.2	17.5	11.7	12	15	48	5	29	0.6
2020-11-23	11.8	70	1029.2	0.3	12.7	10.6	22	32	56	5	27	0.5
2020-11-24	10.7	93	1027.8	0	11.7	9.8	15	16	47	5	35	0.5
2020-11-25	12.9	99	1024.8	0	15.2	11.1	12	12	41	5	42	0.6
2020-11-26	13.3	100	1024	0	15.3	12.5	14	14	36	5	48	0.9
2020-11-27	12	95	1028.6	0.2	13.5	11	26	25	51	5	30	0.7
2020-11-28	10.4	63	1031.7	0.3	12	8.5	23	34	63	6	27	0.5
2020-11-29	9.3	64	1031.2	0.2	11.4	7.1	28	35	67	7	32	0.6
2020-11-30	10.1	63	1033.8	0.2	13.1	8.2	56	59	81	8	35	0.7
2020-12-01	11.5	64	1032.7	0.3	14.6	9.1	23	32	70	6	32	0.5
2020-12-02	12	65	1029.4	0.1	13	11.2	15	29	52	5	37	0.4
2020-12-03	9.8	72	1031.2	0.3	11.2	8.4	51	51	62	7	34	0.8
2020-12-04	7.1	65	1032.1	0.2	9.8	4.3	30	38	57	8	42	0.6
2020-12-05	8.3	62	1030.9	0.1	10.6	5.8	27	36	59	6	52	0.6
2020-12-06	11.1	66	1027.7	0	14.3	8.2	25	38	59	6	63	0.6
2020-12-07	12.1	72	1028.3	0.1	14	10.3	40	41	66	6	48	0.7
2020-12-08	10.2	67	1029.3	0.3	11	9.5	49	50	73	8	36	0.7
2020-12-09	10.5	66	1025.2	0.1	14.2	7.5	19	30	61	6	53	0.5
2020-12-10	12.1	76	1022.4	0.1	13.7	11.2	66	69	14	8	73	1
2020-12-11	10.6	82	1021.3	0.1	11.2	10	90	75	14	6	62	1.1
2020-12-12	9	70	1021.1	0.2	11.5	6.6	156	124	76	11	77	1.5
2020-12-13	9	64	1020.6	0.3	12.8	6.7	135	107	92	9	71	1.3
2020-12-14	4.3	67	1030.6	0.6	8.2	2.5	16	100	52	5	27	0.6
2020-12-15	3.4	52	1033.2	0.3	6	0.7	21	30	55	6	33	0.7
2020-12-16	4	46	1034	0.3	6.6	1.4	43	52	55	10	43	0.8
2020-12-17	5.3	54	1031.9	0.2	8.5	2.4	34	42	65	7	48	0.6
2020-12-18	6.5	68	1030.2	0.2	7.9	5.2	49	46	56	7	49	0.8
2020-12-19	6.5	56	1033.8	0.3	8.5	5.1	40	44	70	6	40	0.7
2020-12-20	5.8	55	1034.4	0.2	8.2	3.8	16	28	62	5	40	0.5
2020-12-21	5.9	47	1031.9	0.1	9.4	3.2	41	50	59	9	80	0.9
2020-12-22	6.8	59	1027.6	0.1	11.4	3.3	61	60	50	9	96	0.9
2020-12-23	9.1	81	1022.6	0.1	12.4	6.4	48	50	33	7	84	0.7
2020-12-24	9.5	66	1021.5	0.2	12.2	7	93	95	84	10	75	1.1
2020-12-25	7.9	56	1025.9	0.2	10.9	5.5	34	79	74	7	66	0.6
2020-12-26	9.5	70	1023.2	0.1	12.6	6	16	35	46	5	59	0.5
2020-12-27	11.4	86	1019.1	0.1	13.2	9.7	71	73	27	10	85	1.2
2020-12-28	11.1	81	1021.4	0.1	15.5	7.4	87	66	70	8	76	1.1
2020-12-29	11.6	87	1019.1	0.4	16.6	2.9	20	30	48	6	63	0.6
2020-12-30	-1.8	49	1034.3	0.6	2.9	-4.1	17	50	55	8	24	0.6
2020-12-31	-3.3	37	1035.5	0.5	0.5	-5.9	30	62	46	9	43	0.8
2021-01-01	-0.1	44	1031.2	0.1	4.1	-2.7	39	58	46	9	58	0.8
2021-01-02	2.4	49	1029.7	0.2	7.1	-1	54	65	51	9	66	0.9
2021-01-03	5.8	76	1030.6	0.4	10.3	2	42	51	60	5	54	0.6
2021-01-04	9.4	74	1028.1	0.4	13.3	7.1	21	42	54	5	52	0.5
2021-01-05	8.2	72	1028.7	0.6	9.9	6	31	44	65	6	30	0.5
2021-01-06	4.6	57	1029.1	0.4	6	3.7	33	49	52	8	37	0.6
2021-01-07	-2	38	1033.4	0.9	4.4	-5.9	23	84	49	8	25	0.5
2021-01-08	-4.8	28	1033.6	0.6	-1.4	-7.1	23	58	49	10	37	0.6
2021-01-09	-1.1	32	1030.9	0.2	3.1	-4.2	37	73	48	12	59	0.9
2021-01-10	1.1	38	1030.6	0.2	5.2	-2	54	84	39	14	72	1.1
2021-01-11	2.8	36	1029.9	0.2	6.1	-0.2	54	85	45	14	67	0.9
2021-01-12	3.5	35	1024.1	0.2	8.5	-0.6	40	142	56	10	63	0.6
2021-01-13	7.4	36	1018.4	0.1	14.8	2.9	45	104	52	11	78	0.7
2021-01-14	9	50	1018.5	0.2	16.8	4	53	91	89	12	85	0.7
2021-01-15	11.7	62	1016.9	0.2	19.1	7.7	60	97	66	10	59	0.7
2021-01-16	5.5	63	1028	0.9	9.1	3.1	26	84	65	5	22	0.4
2021-01-17	3.1	50	1033.6	0.5	5.8	0.7	38	83	60	8	41	0.6
2021-01-18	4.9	45	1026.8	0.1	10.5	1.1	61	115	56	10	78	0.8
2021-01-19	6.7	63	1028	0.4	11.7	3.1	41	74	78	7	56	0.6
2021-01-20	9.2	81	1024.8	0.2	13.7	5.4	13	33	64	5	38	0.4
2021-01-21	13.6	90	1019.9	0.1	17.8	10.5	31	47	38	6	58	0.6
2021-01-22	11.8	92	1018.3	0.2	15.6	9.5	40	29	54	4	42	0.7
2021-01-23	8.2	92	1018.5	0.4	9.5	7.6	49	44	68	4	36	0.8
2021-01-24	7.7	82	1023.8	0.3	10.3	5.6	64	68	64	5	47	0.8
2021-01-25	11.8	78	1022.2	0.3	15.6	9.8	18	28	61	5	49	0.5
2021-01-26	9.5	97	1021	0.1	11.6	7.8	29	25	30	4	50	1.2
2021-01-27	8.2	73	1024	0.4	10.6	6.1	50	54	90	5	33	0.9
2021-01-28	8	67	1024.7	0.4	10.8	4.3	67	88	67	5	39	0.9
2021-01-29	4.4	45	1029.9	0.5	8.5	1.6	15	73	62	7	31	0.5
2021-01-30	7.4	56	1026.5	0.2	13.5	3.5	24	66	90	11	38	0.5
2021-01-31	11.5	73	1023.2	0.1	14.9	9.5	22	41	51	7	51	0.6
2021-02-01	10.5	85	1020.4	0	12.4	9	54	57	21	6	71	1.2
2021-02-02	8.3	70	1027.1	0.4	10.8	6.3	40	76	72	5	31	0.7
2021-02-03	8.5	69	1025.9	0.3	13.4	5	25	75	93	6	36	0.5
2021-02-04	9.2	63	1027.3	0.5	12.6	6.9	50	74	94	6	35	0.7
2021-02-05	8.3	86	1022.1	0.1	10	6.9	31	40	67	5	46	0.6
2021-02-06	11	78	1019.4	0.1	16.2	8.7	62	52	89	6	43	0.9
2021-02-07	12.4	65	1020.6	0.1	19.3	7.2	73	67	106	8	60	1
2021-02-08	8.5	62	1029.3	0.7	14.4	5.6	18	33	77	5	18	0.4
2021-02-09	7.1	59	1029.6	0.6	11.3	4.4	11	22	72	5	22	0.4
2021-02-10	9.2	72	1024.4	0.2	12.3	7	15	24	64	5	27	0.4
2021-02-11	9.6	91	1022.8	0.2	10.6	8.4	15	17	58	5	28	0.4
2021-02-12	10.6	87	1022.3	0.2	13	8.3	20	27	97	5	22	0.4
2021-02-13	12.9	69	1022.6	0.4	17.1	10.2	27	35	98	6	27	0.5
2021-02-14	14.3	77	1015.6	0.1	19.6	10.6	36	35	85	6	27	0.6
2021-02-15	10.9	74	1018.5	0.5	15.1	6.4	38	38	69	5	17	0.7
2021-02-16	7.7	57	1020.4	0.3	12.4	4.8	28	41	81	6	21	0.5
2021-02-17	5.9	48	1027	0.7	10.6	3.8	18	38	82	5	15	0.5
2021-02-18	4.8	43	1030.1	0.3	8.6	1.5	21	35	82	6	30	0.6
2021-02-19	9.2	41	1023.8	0.2	17.5	3.6	36	44	109	8	45	0.7
2021-02-20	14.3	46	1016.8	0.1	23.2	8.2	30	44	105	7	38	0.6
2021-02-21	16.2	42	1013.9	0.1	24.1	10.2	28	42	115	8	41	0.5
2021-02-22	16.2	53	1015.2	0.3	26.2	10.7	42	71	113	8	44	0.7
2021-02-23	9.7	62	1024.8	1	13.1	7.4	11	38	89	4	17	0.4
2021-02-24	10.6	72	1021.5	0.7	15.3	7.6	11	36	82	4	23	0.4
2021-02-25	13.5	90	1014.5	0.2	16.8	11	23	43	81	5	33	0.6
2021-02-26	9.6	96	1016.8	0.5	13	8.9	15	20	79	4	24	0.5
2021-02-27	10.8	84	1020.9	0.7	12.4	9.8	14	27	71	4	22	0.5
2021-02-28	12	97	1019.9	0.2	14.2	10.8	16	19	59	4	35	0.5
2021-03-01	12.1	98	1016.7	0.2	13.8	6.6	27	17	52	4	38	0.7
2021-03-02	6.6	68	1027.8	0.7	10.6	3.5	24	42	75	4	24	0.6
2021-03-03	8.3	66	1027.4	0.4	11.9	5.5	13	46	79	4	29	0.5
2021-03-04	11	85	1020.9	0.1	14.2	9.5	36	37	61	5	49	0.7
2021-03-05	9.9	84	1020.8	0.3	12.5	7.6	30	28	66	4	43	0.6
2021-03-06	10.2	84	1023.7	0.7	11.1	8.8	24	35	75	4	26	0.5
2021-03-07	8.7	94	1027.1	0.4	9.5	7.7	19	30	69	4	30	0.6
2021-03-08	10.5	84	1026.8	0.3	12.4	9.1	25	35	82	4	31	0.5
2021-03-09	9.5	87	1025.6	0.3	10.7	8.4	24	32	59	4	43	0.5
2021-03-10	12.1	64	1027.7	0.3	17.3	8.2	36	43	104	5	39	0.6
2021-03-11	11.1	94	1022.5	0.1	12.4	10.1	45	34	76	5	45	0.7
2021-03-12	11.6	84	1023.1	0.1	12.9	10.6	48	40	69	4	46	0.8
2021-03-13	11.4	71	1023.8	0.4	16.2	7.8	64	63	106	5	52	0.7
2021-03-14	12.4	74	1020.6	0.4	18	8.4	55	43	110	4	37	0.6
2021-03-15	16.5	70	1013.7	0.4	23.4	11.6	41	53	113	7	49	0.7
2021-03-16	14.1	89	1016	0.4	19.6	11	39	68	90	4	35	0.7
2021-03-17	10.5	72	1019.1	0.5	12.1	9.6	20	84	74	5	34	0.5
2021-03-18	12.2	75	1017.8	0.5	15.7	10.3	20	74	68	5	38	0.5
2021-03-19	12.7	93	1015.5	0.3	13.3	12.1	23	44	58	4	50	0.5
2021-03-20	11.3	93	1014.8	0.3	12.8	9.8	33	35	63	4	37	0.7
2021-03-21	11.2	59	1022.7	0.5	14.2	9	59	92	81	6	31	0.8
2021-03-22	10.8	41	1027.8	0.3	15.6	6.6	32	64	86	7	51	0.6
2021-03-23	12.3	54	1024	0.4	17.2	7.9	48	65	132	8	48	0.6
2021-03-24	14.7	64	1018.2	0.3	19	12.1	21	38	78	6	49	0.5
2021-03-25	16.4	57	1020.9	0.3	22.9	11.1	42	70	141	7	58	0.6
2021-03-26	15.9	68	1018.1	0.4	21.5	11.5	26	43	95	5	34	0.4
2021-03-27	18.1	89	1009.4	0.2	21.3	16.5	29	33	59	5	37	0.7
2021-03-28	18.4	70	1008.8	0.1	23.9	14.3	63	95	129	6	47	0.8
2021-03-29	19.2	69	1007.9	0.3	25.4	14.7	56	66	134	6	38	0.7
2021-03-30	16.4	69	1009.2	0.5	19.5	14.7	67	311	99	4	29	0.5
2021-03-31	14.5	84	1009.2	0.2	15.6	12.5	40	155	74	4	35	0.5
2021-04-01	15.6	98	1008.1	0.2	17.6	14.6	29	36	63	4	36	0.6
2021-04-02	16.9	91	1011.2	0.1	20.8	14.8	59	62	45	4	53	1.2
2021-04-03	16.5	84	1014.1	0.2	18.3	13	51	46	51	4	40	0.8
2021-04-04	13.4	58	1021	0.5	17.5	11.2	20	43	101	5	21	0.5
2021-04-05	13.5	42	1023.1	0.3	19.1	9.6	16	37	103	5	27	0.4
2021-04-06	15.7	49	1021.7	0.3	20.9	13	17	32	92	5	31	0.4
2021-04-07	14.4	52	1021.8	0.2	17.8	12.3	24	33	93	5	43	0.5
2021-04-08	14.1	58	1021.5	0.3	19.1	10.6	34	38	128	5	36	0.5
2021-04-09	14.6	44	1023.6	0.4	19.8	9.8	22	39	101	5	33	0.5
2021-04-10	15.1	57	1026.1	0.3	20.1	11.2	21	44	111	5	30	0.5
2021-04-11	15.4	91	1023.4	0.2	17.1	14.5	13	24	83	4	32	0.5
2021-04-12	16.9	100	1015.8	0.1	17.4	16.1	29	27	63	4	42	0.8
2021-04-13	16.4	82	1018.4	0.4	20.2	13.4	54	49	104	5	36	0.8
2021-04-14	13.1	57	1021.5	0.5	15.6	11.6	14	30	87	5	27	0.4
2021-04-15	13.4	61	1017.9	0.4	16.5	10.7	12	36	87	5	32	0.4
2021-04-16	17.6	75	1015.8	0.2	24.8	12.5	54	61	147	7	44	0.7
2021-04-17	17.5	67	1019.4	0.3	20.2	15.1	64	132	97	6	44	0.7
2021-04-18	15.3	41	1022.1	0.3	20.1	11.4	16	55	108	6	36	0.4
2021-04-19	16.4	50	1018.5	0.3	22.4	12.1	17	46	137	6	32	0.5
2021-04-20	17.1	62	1017.4	0.3	22	13	15	39	125	5	24	0.5
2021-04-21	19.2	73	1016.3	0.4	24.1	16.2	18	48	119	5	20	0.5
2021-04-22	20	83	1012.2	0.4	23.4	17.7	20	47	93	5	28	0.5
2021-04-23	20.1	87	1011.6	0.2	22	19.2	58	50	76	5	43	0.9
2021-04-24	18.3	90	1015.1	0.1	20.2	16.8	31	34	53	5	37	0.6
2021-04-25	20.1	80	1017.7	0.3	24.4	18	25	43	75	6	37	0.4
2021-04-26	19.5	63	1018.3	0.3	24.3	16.4	20	36	115	6	29	0.4
2021-04-27	17.7	92	1016.4	0.1	18.5	16.7	32	41	69	5	47	0.6
2021-04-28	19.7	80	1017	0.2	23.9	16.8	53	46	133	6	43	0.7
2021-04-29	22.1	57	1010.2	0.2	28.7	17	54	87	148	7	48	0.7
2021-04-30	24.6	46	1005.4	0.4	30.3	18.3	31	92	155	7	40	0.6
2021-05-01	21.7	45	1010	0.6	28.3	18	23	48	117	6	28	0.6
2021-05-02	18.2	55	1018.4	0.6	22.3	16	18	38	107	5	21	0.5
2021-05-03	19	62	1015.4	0.8	24.6	14.2	18	50	137	5	17	0.5
2021-05-04	20.9	94	1007.9	0.5	23	18.1	19	25	80	5	20	0.7
2021-05-05	20.2	61	1017	0.4	27	15.5	48	70	171	7	31	0.9
2021-05-06	20.3	44	1015.8	0.5	24.6	16.8	20	68	147	6	30	0.5
2021-05-07	22.9	65	1010.8	0.4	29.7	19	51	195	147	6	36	0.7
2021-05-08	23.4	61	1007.6	0.3	29.9	19.1	59	157	167	6	41	0.8
2021-05-09	26.7	65	1007.4	0.3	33.3	21.4	49	74	182	7	44	0.8
2021-05-10	26.9	60	1005.8	0.7	33.7	21.4	21	42	164	6	30	0.6
2021-05-11	24.1	89	1004.6	0.2	28.1	22.5	41	35	63	5	48	0.8
2021-05-12	21.7	91	1007.8	0.4	23.8	20.6	22	22	88	4	26	0.5
2021-05-13	20.5	93	1009.5	0.4	22	19.3	18	21	82	4	24	0.6
2021-05-14	23.1	94	1007.3	0.3	29	20.2	26	26	83	4	34	0.6
2021-05-15	27.3	83	1003.7	0.4	33.9	22.3	31	46	141	6	33	0.6
2021-05-16	25.2	87	1003.4	0.4	28.7	20	17	21	94	4	28	0.7
2021-05-17	19.6	70	1011.7	0.4	25.1	15.3	34	33	130	5	29	0.8
2021-05-18	20.4	66	1012.1	0.3	23.6	17.5	23	28	98	5	37	0.6
2021-05-19	19	77	1010.2	0.4	23	16.5	12	16	108	4	23	0.5
2021-05-20	19	91	1006.4	0.2	20	16.9	28	27	86	4	36	0.8
2021-05-21	20.7	72	1010.3	0.5	25.9	17.8	31	33	130	4	37	0.6
2021-05-22	21.7	71	1010.2	0.6	26	19.5	19	22	132	4	23	0.5
2021-05-23	19.5	90	1008.6	0.4	20.7	18.2	13	16	102	4	24	0.5
2021-05-24	21.5	75	1011.4	0.3	28.1	17.1	29	38	173	6	31	0.7
2021-05-25	25.1	65	1011	0.3	31.5	21.7	63	90	201	7	40	0.8
2021-05-26	21.6	85	1006.4	0.2	23.9	19.4	29	31	89	5	44	0.7
2021-05-27	23	86	1005.9	0.1	28.3	19.9	43	44	138	5	33	0.9
2021-05-28	25	74	1005.3	0.3	28.2	22	33	53	118	6	36	0.7
2021-05-29	24.1	54	1007.4	0.5	29	20.1	26	59	168	6	33	0.5
2021-05-30	26.1	69	1005.8	0.5	31.2	21.9	35	51	172	6	31	0.6
2021-05-31	25	59	1007.6	0.5	29	21.5	19	38	130	5	24	0.4
2021-06-01	24.2	80	1008.8	0.6	28.7	21.6	16	32	101	5	17	0.4
2021-06-02	21.6	95	1007.7	0.4	23.6	19.9	13	27	90	4	18	0.4
2021-06-03	23.8	90	1003.7	0.2	27.8	21.4	46	46	99	4	35	0.7
2021-06-04	21.7	79	1006.7	0.3	26.1	18	38	37	147	6	30	0.7
2021-06-05	25.1	62	1004.3	0.4	32.2	20	31	46	177	8	33	0.6
2021-06-06	26.7	58	1005.7	0.4	33.7	21.3	28	48	205	7	34	0.6
2021-06-07	26.1	54	1010.4	0.5	32.6	21.2	13	32	120	6	30	0.5
2021-06-08	25.3	82	1010.5	0.4	28.8	22.8	13	20	100	4	26	0.5
2021-06-09	26	88	1009	0.4	28.4	24	16	19	58	5	22	0.5
2021-06-10	25.8	95	1007.2	0.4	27.4	23.9	13	18	61	4	24	0.5
2021-06-11	26.1	86	1008.2	0.3	30.3	22.9	24	25	112	5	34	0.6
2021-06-12	26.5	78	1011	0.5	30.7	23.9	18	22	86	5	27	0.4
2021-06-13	25.8	94	1008.5	0.3	26.6	25.1	30	24	66	4	33	0.6
2021-06-14	26	94	1003.6	0.2	28.1	24.9	36	27	62	5	33	0.6
2021-06-15	28	90	997.9	0.2	32.9	25.8	31	37	90	5	31	0.7
2021-06-16	26.2	86	1001	0.4	27.7	24.3	16	20	67	4	22	0.6
2021-06-17	24.4	96	1003.7	0.3	26	23.2	18	22	59	4	29	0.5
2021-06-18	25.5	94	1002.6	0.2	27.9	23.7	39	31	66	5	37	0.8
2021-06-19	20.6	96	1003.6	0.2	23.7	19.6	14	15	78	4	37	0.6
2021-06-20	22.9	82	1002.8	0.2	26.4	20.3	24	27	107	5	35	0.6
2021-06-21	25.7	65	1004.1	0.3	31.4	22	33	35	147	5	28	0.5
[truncated: 1,654 more rows]
